# Supplementary material for: Transcriptome Reveals Granulosa Cells Coping through Redox, Inflammatory and Metabolic Mechanisms under Acute Heat Stress
Source: MDPI journal article supplement (doi:10.3390/cells11091443), 2022-04-25
Supplement: s1 [file s1]

Table S1: List of primers used for RT-qPCR validation of genes found in RNA sequencing.

| Gene            | Accession no.  | Forward 5'→3'          | Reverse 5'→3'          |
|-----------------|----------------|------------------------|------------------------|
| <i>BAX</i>      | NM_173894.1    | AGACACCTGAGCTGACCTTG   | GTCCCGAAGTAGGAGAGGAG   |
| <i>CASP3</i>    | NM_001077840.1 | CTGGACTGTGGCATTGAGAC   | GCAAAGGGACTGGAGAACC    |
| <i>RBM3</i>     | NM_001303463.1 | GTCCAGAGACTATGGTGGCAG  | TCATTTGGAGAGGTGGTCCTG  |
| <i>CAMKK2</i>   | XM_587244      | TGGAGACGAGTATTGCGACA   | CGCCCAACGTAGTCAAACCTT  |
| <i>VEGFA</i>    | NM_174216.2    | ATGACGAAAGTCTGGAGTGTG  | TCTCCTATGTGCTGGCTTTG   |
| <i>HSPA5</i>    | NM_001038505.2 | CAACCAACTGTTACCATCAAGG | AAAGGTGACTTCAATCTGTGG  |
| <i>BAK1</i>     | NM_001077918.1 | AGAACCTAGCAGCACCAT     | CGATCTTGGTGAAGTACTC    |
| <i>β-actin</i>  | NM_173979.3    | AACTTGCGCAGAAAACGAGA   | CTGTCACCTTCACCGTTCCA   |
| <i>TLR2</i>     | NM_174197.2    | CATGGGTCTGGGCTGTCATC   | TCACACACCTCTGCAGGTCTC  |
| <i>B2M</i>      | NM_173893.3    | GGGCTGCTGTCGCTGTCT     | CTTCTCCCCATTCTTCAGCAAA |
| <i>PPARGC1A</i> | 861 bp length  | TCCCCAGGCAGTAGATCTTC   | TCCTCGTAGCTGTCATACCTG  |
