# Supplementary material for: Transcriptome Reveals Granulosa Cells Coping through Redox, Inflammatory and Metabolic Mechanisms under Acute Heat Stress
Source: MDPI journal article supplement (doi:10.3390/cells11091443), 2022-04-25
Supplement: s1 [file s1]

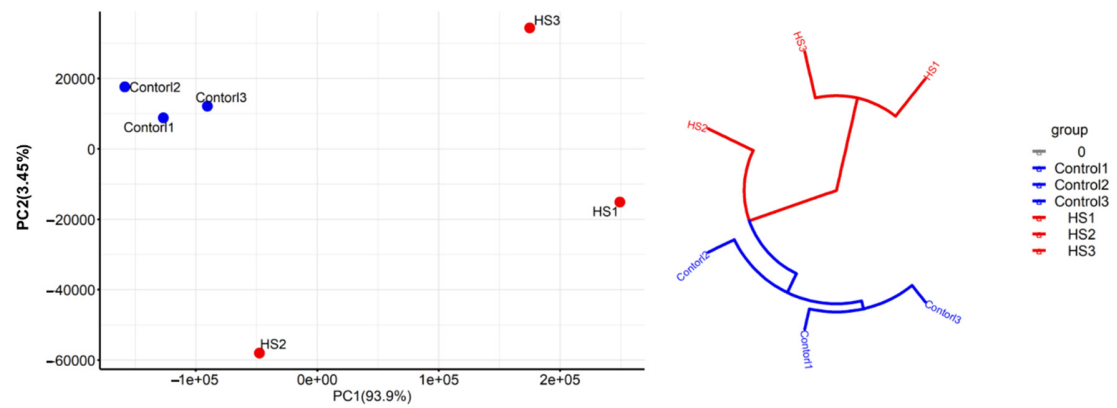

Supplementary Figure S1: RNA-seq read counts of heat stress and control groups (3 replicate each) are distinctly different from each other as shown in principal components analysis and dendrogram clustering structure.
