# Supplementary material for: Transcriptome Reveals Granulosa Cells Coping through Redox, Inflammatory and Metabolic Mechanisms under Acute Heat Stress
Source: Cells. 2022 Apr 25;11(9):1443. doi: 10.3390/cells11091443 (PMC9105522; doi:10.3390/cells11091443)
Supplement: Supplementary file 1 [file cells-11-01443-s001.zip]

Archive with 7 entries (7 files):
- Supplementary Figure S1 for proof.pdf
- Supplementary Table S1 for proof.pdf
- Supplementary Table S2.csv
- Supplementary Table S3.csv
- Supplementary Table S4.csv
- Supplementary Table S5.csv
- Supplementary Table S6.xlsx
