# Supplementary material for: Transcriptome Reveals Granulosa Cells Coping through Redox, Inflammatory and Metabolic Mechanisms under Acute Heat Stress
Source: Cells. 2022 Apr 25;11(9):1443. doi: 10.3390/cells11091443 (PMC9105522; doi:10.3390/cells11091443)
Supplement: Supplementary file 1 [file cells-11-01443-s001.zip › Supplementary Table S2.csv]

Supplementary Table S2: List of all differentially expressed gene reads along with their statistics parameters, found in control versus heat stressed granulosa cells.
Name	logFC	logCPM	PValue	FDR	Description
ENSBTAG00000025848	1.664540088	8.161048389	1.73E-260	2.15E-256	RBM3
ENSBTAG00000011689	-0.905251713	7.452750508	9.18E-45	5.69E-41	LENG8
ENSBTAG00000050495	0.716663875	6.912422414	1.28E-41	5.29E-38	GREM1
ENSBTAG00000014614	0.801902499	7.0982792	1.70E-40	5.26E-37	ACTA2
ENSBTAG00000015405	-0.968415946	5.882808257	2.12E-39	5.24E-36	DCHS1
ENSBTAG00000051191	-1.411486828	6.698962192	7.35E-38	1.52E-34	ENSBTAG00000051191
ENSBTAG00000011002	-1.213934732	4.187717252	3.60E-35	6.36E-32	CCDC136
ENSBTAG00000001173	-0.631710457	6.685462406	1.33E-34	2.06E-31	PLXNA2
ENSBTAG00000007431	-0.553614488	10.22734989	1.77E-34	2.43E-31	CEMIP
ENSBTAG00000006367	0.574761328	9.163458673	9.22E-34	1.14E-30	CCN2
ENSBTAG00000002128	-0.947690481	4.997729539	1.08E-33	1.22E-30	MPPE1
ENSBTAG00000048958	-0.764595396	6.498302025	2.69E-33	2.77E-30	ENSBTAG00000048958
ENSBTAG00000019807	-0.525380894	8.588422429	2.48E-32	2.37E-29	COL27A1
ENSBTAG00000012683	-0.544407098	9.635925044	3.71E-31	3.28E-28	SRRM2
ENSBTAG00000005260	0.488492802	8.733363798	6.08E-30	5.02E-27	SPP1
ENSBTAG00000018161	-0.652300717	6.369464326	6.59E-30	5.10E-27	TBX18
ENSBTAG00000000625	-0.776459643	5.606222901	1.30E-29	9.51E-27	SMAD6
ENSBTAG00000020764	0.583470153	6.626275434	1.86E-28	1.28E-25	CNN2
ENSBTAG00000017666	-0.736575831	5.414250068	6.78E-28	4.42E-25	ABCC5
ENSBTAG00000002082	-0.477535465	8.012143836	3.54E-27	2.19E-24	MARCKS
ENSBTAG00000002425	-1.003460888	4.030520868	3.53E-25	2.08E-22	SCN9A
ENSBTAG00000004547	0.527631885	7.146187694	9.59E-25	5.40E-22	OLR1
ENSBTAG00000011869	0.45199745	9.202462478	2.72E-24	1.46E-21	CSRP3
ENSBTAG00000012409	0.414655481	12.15373301	5.70E-24	2.94E-21	POSTN
ENSBTAG00000049375	-0.78690861	5.348435284	5.95E-24	2.95E-21	ENSBTAG00000049375
ENSBTAG00000001511	-0.500375634	7.186014629	1.26E-23	6.02E-21	BCL6
ENSBTAG00000051245	-0.506875655	6.708156433	1.48E-23	6.79E-21	SOX4
ENSBTAG00000014512	-0.478803161	7.360751669	1.62E-23	7.15E-21	WDR19
ENSBTAG00000011473	0.468348985	7.892166898	1.08E-22	4.63E-20	MYL9
ENSBTAG00000004104	-0.541159366	6.240522365	1.18E-22	4.89E-20	RUNX2
ENSBTAG00000015402	-0.463715132	8.541790685	1.97E-22	7.89E-20	GREB1
ENSBTAG00000001599	-0.504133613	6.592665729	9.69E-22	3.75E-19	SV2A
ENSBTAG00000015177	0.438292641	7.717329953	1.00E-21	3.75E-19	PRSS23
ENSBTAG00000011734	-0.451102955	8.048751369	1.23E-21	4.49E-19	ANKRD1
ENSBTAG00000006884	-0.47928424	7.243792093	2.87E-21	1.02E-18	PABPN1
ENSBTAG00000015441	0.541780273	6.661292019	3.55E-21	1.22E-18	ACTG2
ENSBTAG00000015222	-1.069810679	4.167745601	5.89E-21	1.97E-18	RSRP1
ENSBTAG00000003822	-0.698932541	5.301509143	1.05E-20	3.42E-18	CROCC
ENSBTAG00000002215	-0.485865807	7.130587445	1.30E-20	4.11E-18	GFPT2
ENSBTAG00000003152	0.736913454	5.160980056	1.84E-20	5.70E-18	IFI27
ENSBTAG00000024199	-0.536627875	7.512764375	3.72E-20	1.12E-17	KMT2C
ENSBTAG00000014178	-0.538042257	6.10207657	7.26E-20	2.14E-17	RALGAPA2
ENSBTAG00000016991	-0.805377972	4.554796541	1.65E-19	4.75E-17	EFNB2
ENSBTAG00000046176	-0.539019726	6.367306095	6.90E-19	1.94E-16	SPEG
ENSBTAG00000051248	-0.476697797	6.778447806	7.12E-19	1.96E-16	ENSBTAG00000051248
ENSBTAG00000005339	-0.710218254	8.519812875	1.05E-18	2.82E-16	VEGFA
ENSBTAG00000011584	0.447826111	7.759420445	1.46E-18	3.83E-16	CHST2
ENSBTAG00000047229	0.578181921	5.828147525	2.13E-18	5.51E-16	CRIP1
ENSBTAG00000000902	-0.449632307	6.810614302	2.47E-18	6.24E-16	OGT
ENSBTAG00000021048	-0.426187656	8.375750153	2.62E-18	6.48E-16	ADM
ENSBTAG00000005261	0.484228455	6.75461082	4.86E-18	1.18E-15	ENSBTAG00000005261
ENSBTAG00000021452	-0.383631102	7.962190768	5.97E-18	1.42E-15	TRANK1
ENSBTAG00000004046	-1.678774412	1.963829778	1.29E-17	3.02E-15	DTX4
ENSBTAG00000007079	0.597040486	5.669620355	1.84E-17	4.23E-15	LCP1
ENSBTAG00000011424	0.404981669	8.399690724	2.23E-17	5.02E-15	TPM2
ENSBTAG00000022635	-0.381659399	8.12511539	2.57E-17	5.68E-15	LAMB2
ENSBTAG00000051211	-0.53081174	5.785120913	1.08E-16	2.35E-14	DUSP8
ENSBTAG00000007773	0.445087263	6.901584406	1.62E-16	3.45E-14	VCAM1
ENSBTAG00000013288	-0.426710071	6.496876344	3.56E-16	7.46E-14	SUGP2
ENSBTAG00000044097	-0.744979234	4.374699734	8.78E-16	1.81E-13	KLF7
ENSBTAG00000002299	-0.728315304	4.703211061	1.01E-15	2.04E-13	SEL1L3
ENSBTAG00000007196	0.378993393	9.049741185	1.47E-15	2.93E-13	TAGLN
ENSBTAG00000004873	-0.55095426	5.484628875	1.68E-15	3.30E-13	CCNL2
ENSBTAG00000004150	-0.503594148	5.817706337	1.78E-15	3.44E-13	NRG1
ENSBTAG00000019313	-0.372224567	8.873068475	2.02E-15	3.85E-13	ZMIZ1
ENSBTAG00000008552	-0.466765945	6.104687164	2.40E-15	4.51E-13	PLXNA3
ENSBTAG00000011772	-0.841897388	3.814175951	3.66E-15	6.76E-13	PPP1R12B
ENSBTAG00000017751	-1.092553284	3.030531113	4.76E-15	8.68E-13	RGS9
ENSBTAG00000008331	0.515543577	6.476298091	7.32E-15	1.31E-12	TMEM54
ENSBTAG00000051239	-1.076368497	3.099659549	7.52E-15	1.33E-12	ENSBTAG00000051239
ENSBTAG00000014207	-0.538101847	5.416400043	9.62E-15	1.68E-12	ADAMTS10
ENSBTAG00000004078	-0.431093234	6.650981003	1.34E-14	2.31E-12	KCNH2
ENSBTAG00000015571	-0.388916339	6.931263879	1.82E-14	3.08E-12	GCLC
ENSBTAG00000007753	-0.692966775	4.629626403	2.05E-14	3.44E-12	KIFC2
ENSBTAG00000009856	-0.41780348	6.332558563	2.22E-14	3.66E-12	ACAP3
ENSBTAG00000009887	-0.327154606	8.869387105	3.19E-14	5.20E-12	DDX17
ENSBTAG00000014429	-0.44654581	7.905616597	4.14E-14	6.66E-12	KMT2D
ENSBTAG00000027764	0.405019548	6.618412524	4.40E-14	6.99E-12	EID1
ENSBTAG00000049306	0.519394154	6.064415308	4.58E-14	7.17E-12	MSRB1
ENSBTAG00000026995	-0.433880777	6.32604578	6.87E-14	1.06E-11	PNN
ENSBTAG00000005408	-0.49295347	5.795071941	7.15E-14	1.09E-11	CLK1
ENSBTAG00000014713	0.344424312	7.588622802	1.62E-13	2.45E-11	RARRES1
ENSBTAG00000016739	-0.452811923	5.805596719	2.03E-13	3.03E-11	RASAL1
ENSBTAG00000006039	0.860883226	3.495737848	3.37E-13	4.97E-11	ARHGDIB
ENSBTAG00000015124	-0.409879184	6.661496927	3.78E-13	5.51E-11	ARGLU1
ENSBTAG00000012237	0.475072586	6.006676518	5.36E-13	7.72E-11	AEBP1
ENSBTAG00000040551	-0.387390995	6.673532703	6.15E-13	8.75E-11	ZBTB1
ENSBTAG00000000182	0.360049994	7.142445325	6.29E-13	8.85E-11	SPINT2
ENSBTAG00000012919	-0.340511206	7.892931274	6.56E-13	9.13E-11	MMP15
ENSBTAG00000008735	-0.356033727	7.292404958	7.45E-13	1.02E-10	VASH1
ENSBTAG00000020661	-0.46125352	6.244795277	8.57E-13	1.17E-10	ABCA1
ENSBTAG00000003064	-0.508272853	5.469049704	9.12E-13	1.23E-10	PAXBP1
ENSBTAG00000009389	-0.342689649	7.924852759	9.94E-13	1.32E-10	HNRNPH1
ENSBTAG00000051385	-1.051880501	2.991380717	1.06E-12	1.39E-10	ENSBTAG00000051385
ENSBTAG00000015650	-0.561519053	7.8238602	1.33E-12	1.74E-10	TNN
ENSBTAG00000017239	-0.626265899	4.31159869	1.44E-12	1.86E-10	GABBR1
ENSBTAG00000002795	-0.468124762	5.744792153	1.51E-12	1.92E-10	NKTR
ENSBTAG00000011571	-0.343022484	7.457486012	1.70E-12	2.15E-10	ACIN1
ENSBTAG00000006607	0.303263211	8.356694905	2.72E-12	3.40E-10	CCNG1
ENSBTAG00000009972	0.373567225	6.57143497	2.88E-12	3.57E-10	INHA
ENSBTAG00000020975	-0.643126309	4.525883226	3.68E-12	4.52E-10	SYNGAP1
ENSBTAG00000051406	-2.73043307	0.376213554	5.16E-12	6.26E-10	ENSBTAG00000051406
ENSBTAG00000002440	-0.458825848	5.572847313	5.94E-12	7.14E-10	KIF7
ENSBTAG00000047330	0.368532714	7.273459904	6.79E-12	8.08E-10	FABP5
ENSBTAG00000003692	0.578204094	5.339886205	6.86E-12	8.09E-10	UCP2
ENSBTAG00000018093	-0.487511671	7.069001932	7.19E-12	8.40E-10	KMT2A
ENSBTAG00000001644	-0.416028598	6.858672068	8.14E-12	9.42E-10	MDN1
ENSBTAG00000009661	0.460319961	5.847859201	8.50E-12	9.74E-10	RNASEH2A
ENSBTAG00000003921	-0.884448063	3.340403945	1.02E-11	1.16E-09	ENSBTAG00000003921
ENSBTAG00000010987	-0.750521604	4.092869192	1.04E-11	1.17E-09	NFKBIZ
ENSBTAG00000003120	-0.440463282	5.887840062	1.07E-11	1.19E-09	ZNF385B
ENSBTAG00000004797	-0.629165054	4.372052955	1.14E-11	1.26E-09	TRMT44
ENSBTAG00000053319	-1.543033533	1.619923216	1.17E-11	1.29E-09	ENSBTAG00000053319
ENSBTAG00000006769	-0.304381608	10.39697682	1.25E-11	1.36E-09	HSD3B1
ENSBTAG00000010899	0.27839798	10.66289942	1.27E-11	1.36E-09	TIMP2
ENSBTAG00000013697	-0.629371995	4.24871998	1.36E-11	1.45E-09	CLASRP
ENSBTAG00000009226	-0.352600186	8.3725756	1.59E-11	1.69E-09	SCUBE3
ENSBTAG00000012519	-0.411093953	6.230050074	1.71E-11	1.80E-09	XDH
ENSBTAG00000016568	-0.395129357	5.947826367	2.03E-11	2.11E-09	LUC7L
ENSBTAG00000016896	-0.306872411	8.215004847	2.50E-11	2.58E-09	HERPUD1
ENSBTAG00000019730	-0.439407237	6.131573369	2.69E-11	2.75E-09	PNISR
ENSBTAG00000005154	0.391111446	6.511479709	2.71E-11	2.75E-09	APCDD1
ENSBTAG00000002527	-0.390087505	6.298003764	2.86E-11	2.88E-09	ZSWIM4
ENSBTAG00000052055	0.410424198	6.422591947	2.95E-11	2.95E-09	PRSS35
ENSBTAG00000011434	-0.409938506	5.85452885	2.99E-11	2.96E-09	NPR2
ENSBTAG00000051139	-1.644314347	1.011133848	3.08E-11	3.02E-09	ENSBTAG00000051139
ENSBTAG00000005589	-0.556913755	5.468321177	3.30E-11	3.22E-09	STK19
ENSBTAG00000005557	-0.309549398	7.436168767	3.35E-11	3.24E-09	AFDN
ENSBTAG00000051102	0.348675809	6.748375398	3.67E-11	3.53E-09	KCNK3
ENSBTAG00000054572	-0.580892234	4.43792159	4.05E-11	3.86E-09	PEG3
ENSBTAG00000013309	-0.324578554	6.902985656	5.10E-11	4.80E-09	SRSF4
ENSBTAG00000017461	-0.60128334	6.855352727	5.12E-11	4.80E-09	SLC16A3
ENSBTAG00000009462	0.30503695	8.148316101	6.09E-11	5.67E-09	MDH2
ENSBTAG00000054057	-0.462421098	5.535838025	6.76E-11	6.25E-09	NRG1
ENSBTAG00000002279	-0.359053771	6.325473733	6.93E-11	6.36E-09	LUC7L3
ENSBTAG00000018052	-0.322769916	7.372496676	7.22E-11	6.57E-09	PTPRS
ENSBTAG00000001796	-0.834401715	3.170636284	8.23E-11	7.44E-09	CATSPERD
ENSBTAG00000009691	-0.649532224	4.021865404	8.37E-11	7.45E-09	SH2B2
ENSBTAG00000001548	-0.404100058	5.679633912	8.40E-11	7.45E-09	UBQLN4
ENSBTAG00000006990	-0.570608783	4.795745465	8.46E-11	7.45E-09	MYRF
ENSBTAG00000008762	-0.393848282	7.380287905	8.49E-11	7.45E-09	HECTD4
ENSBTAG00000014724	-0.301503011	8.086980822	8.91E-11	7.77E-09	EIF4A2
ENSBTAG00000007662	-0.306277425	9.494747681	9.74E-11	8.44E-09	HSPA5
ENSBTAG00000005498	0.334821154	7.65092981	1.03E-10	8.88E-09	SQLE
ENSBTAG00000009845	-0.32497044	8.650659638	1.29E-10	1.10E-08	ITPK1
ENSBTAG00000009358	-0.531794946	4.623214915	1.34E-10	1.14E-08	MTSS2
ENSBTAG00000035081	-0.556496096	4.527757453	1.45E-10	1.22E-08	SERINC2
ENSBTAG00000003329	-0.351717479	6.535182053	1.60E-10	1.34E-08	FST
ENSBTAG00000007321	-0.350831513	6.546019957	1.99E-10	1.65E-08	SREK1
ENSBTAG00000008591	-0.339843523	6.86580506	2.09E-10	1.73E-08	CAMTA2
ENSBTAG00000023179	-0.923864599	2.749675423	2.68E-10	2.19E-08	TRIB1
ENSBTAG00000004215	0.291655016	9.693516832	2.87E-10	2.34E-08	RARRES2
ENSBTAG00000048204	-1.63030858	0.883883855	3.32E-10	2.69E-08	SPACA6
ENSBTAG00000021351	-0.346544469	6.432287431	3.71E-10	2.98E-08	MED12
ENSBTAG00000016724	0.418734375	5.459352706	3.94E-10	3.15E-08	NPEPL1
ENSBTAG00000044092	0.97618311	2.536761363	4.55E-10	3.60E-08	IQCK
ENSBTAG00000019096	0.298858655	7.688806008	4.57E-10	3.60E-08	UQCRC1
ENSBTAG00000021661	-0.402860238	5.622670381	4.71E-10	3.69E-08	APAF1
ENSBTAG00000001867	-0.33930513	7.646599031	4.82E-10	3.76E-08	SACS
ENSBTAG00000006805	-1.010858688	2.701757456	5.18E-10	4.01E-08	ZNF180
ENSBTAG00000021617	-0.350898232	6.215689205	5.26E-10	4.05E-08	ZC3HAV1
ENSBTAG00000000699	0.317148096	7.598716602	5.45E-10	4.17E-08	AOPEP
ENSBTAG00000002878	-1.225382268	2.055998355	5.77E-10	4.38E-08	CHRD
ENSBTAG00000050861	-2.095963372	0.007587125	6.36E-10	4.80E-08	ENSBTAG00000050861
ENSBTAG00000017456	-0.33401623	6.308646392	6.80E-10	5.11E-08	NYAP1
ENSBTAG00000010322	-0.327331199	7.393025807	6.85E-10	5.11E-08	HYOU1
ENSBTAG00000014371	0.342065723	6.317904343	9.30E-10	6.89E-08	CHPF2
ENSBTAG00000008778	-1.756572794	0.590713883	9.94E-10	7.32E-08	CHST13
ENSBTAG00000037640	-0.361578181	6.411601927	1.01E-09	7.41E-08	PID1
ENSBTAG00000022185	-0.431666674	5.265033853	1.02E-09	7.42E-08	IGHMBP2
ENSBTAG00000021215	-0.257103239	9.608095683	1.02E-09	7.42E-08	VWA5A
ENSBTAG00000002804	-0.273608865	8.708738592	1.16E-09	8.36E-08	PDGFRB
ENSBTAG00000004269	0.303927704	8.019274068	1.17E-09	8.36E-08	SGK1
ENSBTAG00000000737	-0.382916584	5.943968779	1.18E-09	8.36E-08	DMXL2
ENSBTAG00000006934	-0.263904984	8.481277925	1.30E-09	9.17E-08	CYP11A1
ENSBTAG00000000054	-0.524889694	4.818857411	1.58E-09	1.11E-07	SNAPC4
ENSBTAG00000016819	0.473935427	5.259106923	1.59E-09	1.11E-07	FABP3
ENSBTAG00000004835	-1.027934648	2.271953358	1.66E-09	1.16E-07	HOXD3
ENSBTAG00000038477	-0.290914459	7.634395805	1.88E-09	1.30E-07	GGCX
ENSBTAG00000015738	-0.376021425	5.91116119	1.90E-09	1.30E-07	GIGYF1
ENSBTAG00000021237	-0.264366469	9.405494091	1.98E-09	1.35E-07	DST
ENSBTAG00000001745	-0.262761933	12.37176215	2.01E-09	1.37E-07	LUM
ENSBTAG00000013187	-0.290325082	8.121139668	2.08E-09	1.40E-07	DLG5
ENSBTAG00000019014	0.5836627	4.571886821	2.09E-09	1.40E-07	MAGEF1
ENSBTAG00000003436	-0.492893587	4.841062101	2.10E-09	1.40E-07	RHBDF2
ENSBTAG00000012657	-0.321628837	7.034827155	2.11E-09	1.40E-07	ZSWIM8
ENSBTAG00000020735	-0.365888728	7.132746228	2.23E-09	1.48E-07	SMG1
ENSBTAG00000007156	-0.912768854	2.742128397	2.31E-09	1.52E-07	AGAP2
ENSBTAG00000006330	-0.314975163	6.492238412	2.60E-09	1.70E-07	RBM5
ENSBTAG00000012232	0.296221468	7.650563407	2.91E-09	1.90E-07	CYC1
ENSBTAG00000020843	0.616208372	3.984262076	2.99E-09	1.94E-07	PCSK1
ENSBTAG00000019901	-0.739203127	3.362941143	3.09E-09	2.00E-07	RAD54L
ENSBTAG00000003607	-0.400873491	5.579169025	3.16E-09	2.03E-07	FAM20C
ENSBTAG00000007053	-0.57036302	4.221247607	3.42E-09	2.18E-07	ZFHX2
ENSBTAG00000001151	-0.461315768	5.056853232	3.59E-09	2.27E-07	APLP1
ENSBTAG00000019623	0.396530835	5.587208589	3.59E-09	2.27E-07	GRID1
ENSBTAG00000021744	0.333658387	6.934789202	3.61E-09	2.27E-07	PSMC3
ENSBTAG00000053553	-2.02988822	0.041120424	3.79E-09	2.37E-07	ENSBTAG00000053553
ENSBTAG00000014270	-0.625009328	4.181450566	4.13E-09	2.57E-07	UNC5B
ENSBTAG00000013658	-0.282862444	7.436983734	4.15E-09	2.57E-07	ERC1
ENSBTAG00000016026	0.309705677	6.510039298	4.19E-09	2.58E-07	PCOLCE2
ENSBTAG00000015188	-0.28155128	7.208076866	4.36E-09	2.67E-07	KLF6
ENSBTAG00000006541	-1.504974562	0.799466697	4.57E-09	2.79E-07	ATP2A1
ENSBTAG00000004075	0.358203264	6.020700292	4.75E-09	2.89E-07	IDI1
ENSBTAG00000007187	-0.306869071	6.69014953	4.85E-09	2.93E-07	ENSBTAG00000007187
ENSBTAG00000021024	-0.290576605	10.04165331	5.13E-09	3.08E-07	MACF1
ENSBTAG00000010128	0.472354582	4.916986258	5.38E-09	3.20E-07	NAP1L5
ENSBTAG00000001396	-0.316026213	7.31577924	5.38E-09	3.20E-07	ADAMTS7
ENSBTAG00000007113	-0.30293839	8.029134749	6.20E-09	3.66E-07	TRRAP
ENSBTAG00000017074	-0.550349334	4.299157807	6.21E-09	3.66E-07	ANO8
ENSBTAG00000000473	-0.371401104	6.020680391	6.45E-09	3.79E-07	ATP10D
ENSBTAG00000006189	0.251022035	11.39194049	6.53E-09	3.82E-07	ACTG1
ENSBTAG00000003636	0.267057711	8.548633612	7.11E-09	4.13E-07	LIPA
ENSBTAG00000006255	-0.682578867	3.600953542	7.87E-09	4.55E-07	MDM4
ENSBTAG00000010947	-1.278829833	2.248219065	7.90E-09	4.55E-07	PHYHIPL
ENSBTAG00000048486	-0.718521332	3.580392472	7.96E-09	4.56E-07	IQANK1
ENSBTAG00000054218	-0.30778296	13.04220219	8.03E-09	4.59E-07	IGFBP5
ENSBTAG00000014804	-0.29834041	7.102847887	8.82E-09	5.01E-07	HNRNPDL
ENSBTAG00000054287	0.437727017	5.096312953	9.63E-09	5.44E-07	C1QTNF2
ENSBTAG00000016728	-0.457542786	5.251004149	9.91E-09	5.58E-07	PLEKHG5
ENSBTAG00000002485	-0.250647544	9.140320262	1.03E-08	5.75E-07	TNS1
ENSBTAG00000019059	-0.560372889	4.121727523	1.04E-08	5.78E-07	ATG16L2
ENSBTAG00000017482	0.450739542	5.145627819	1.09E-08	6.00E-07	ISYNA1
ENSBTAG00000001961	-0.287430866	8.422989177	1.09E-08	6.00E-07	MAP1B
ENSBTAG00000002515	0.417641695	6.681917903	1.14E-08	6.29E-07	TNNI3
ENSBTAG00000021724	0.32906968	6.036913391	1.23E-08	6.77E-07	PDHB
ENSBTAG00000012890	0.244859233	9.023690847	1.38E-08	7.52E-07	SLC25A3
ENSBTAG00000011844	-0.913340012	2.781820534	1.38E-08	7.52E-07	ENSBTAG00000011844
ENSBTAG00000007589	-0.351809715	5.820526576	1.44E-08	7.78E-07	SMAD9
ENSBTAG00000040361	-0.616171793	4.300953441	1.45E-08	7.78E-07	LFNG
ENSBTAG00000007417	-0.449807775	4.817436753	1.45E-08	7.78E-07	GDF11
ENSBTAG00000018142	0.612463185	3.740395899	1.46E-08	7.82E-07	DTL
ENSBTAG00000007875	-0.267056973	7.414084957	1.59E-08	8.43E-07	SAFB
ENSBTAG00000002036	-0.810153834	3.067367409	1.60E-08	8.49E-07	CACNB1
ENSBTAG00000053735	0.264642048	8.845973699	1.62E-08	8.54E-07	PEG10
ENSBTAG00000013960	0.360784494	6.072989005	1.64E-08	8.62E-07	PSAT1
ENSBTAG00000000621	-0.59497623	4.044693488	1.65E-08	8.65E-07	CATSPERG
ENSBTAG00000009737	-0.44440006	4.992970163	1.74E-08	9.08E-07	LTC4S
ENSBTAG00000020489	-0.724011351	3.072357885	1.98E-08	1.03E-06	SEMA6A
ENSBTAG00000006991	0.767238927	3.044017775	2.05E-08	1.06E-06	ADH6
ENSBTAG00000043564	0.420962388	6.013400556	2.08E-08	1.07E-06	ATP8
ENSBTAG00000003709	-0.395718956	6.778115472	2.15E-08	1.10E-06	ITGB8
ENSBTAG00000000222	-0.352357715	6.150422919	2.29E-08	1.17E-06	ARID4B
ENSBTAG00000021115	-0.553523342	4.018509186	2.35E-08	1.19E-06	ZNF692
ENSBTAG00000009055	-0.425430574	4.947162598	2.40E-08	1.21E-06	RNF144B
ENSBTAG00000051412	-1.962408816	1.194334058	2.41E-08	1.21E-06	HBA
ENSBTAG00000003919	-0.679554153	3.445326181	2.41E-08	1.21E-06	KIAA0408
ENSBTAG00000009711	0.2782631	7.275083648	2.57E-08	1.28E-06	RPA1
ENSBTAG00000023929	-0.251034483	9.019368261	2.78E-08	1.38E-06	FOSL2
ENSBTAG00000020997	-1.464369764	0.816687598	3.12E-08	1.55E-06	GPR15
ENSBTAG00000007705	0.505746005	4.524556231	3.23E-08	1.59E-06	COLEC12
ENSBTAG00000007480	0.35272846	6.411605029	3.58E-08	1.75E-06	CIRBP
ENSBTAG00000021705	0.34240765	5.750647893	3.58E-08	1.75E-06	UFC1
ENSBTAG00000008371	-0.465999132	4.5926423	3.62E-08	1.76E-06	FBXL20
ENSBTAG00000014878	0.541888326	4.077310405	3.80E-08	1.85E-06	COX7A1
ENSBTAG00000011139	0.28757867	7.082828627	3.90E-08	1.89E-06	BCHE
ENSBTAG00000007348	-0.271573255	7.80662649	3.98E-08	1.92E-06	STRA6
ENSBTAG00000017122	-0.269064307	11.43475038	4.29E-08	2.06E-06	HSPG2
ENSBTAG00000008527	-0.246203195	7.891167853	4.38E-08	2.09E-06	SRSF6
ENSBTAG00000032087	-0.274634759	7.264906137	4.63E-08	2.20E-06	ATXN2L
ENSBTAG00000012267	-0.314061068	6.794485727	4.74E-08	2.25E-06	ZFC3H1
ENSBTAG00000005190	-0.300203889	6.579245232	5.04E-08	2.38E-06	TSC1
ENSBTAG00000004509	-0.40777617	5.215996566	5.05E-08	2.38E-06	SLX4
ENSBTAG00000002471	-0.422371969	6.105737072	5.13E-08	2.41E-06	CHL1
ENSBTAG00000013580	-0.297520038	6.529291387	5.37E-08	2.51E-06	KDM3A
ENSBTAG00000023730	-0.286854039	6.578890824	5.41E-08	2.52E-06	TUBB3
ENSBTAG00000003069	0.461004324	4.568141118	5.47E-08	2.54E-06	MAN1C1
ENSBTAG00000000434	-0.296209221	7.47065383	5.54E-08	2.56E-06	CRYAB
ENSBTAG00000047274	-0.332839254	5.908750694	5.57E-08	2.56E-06	KIF21B
ENSBTAG00000010989	-0.252629391	8.336199367	5.76E-08	2.64E-06	PIK3R1
ENSBTAG00000046359	-0.279723733	6.721861358	5.98E-08	2.73E-06	PHRF1
ENSBTAG00000015739	-0.21914752	10.65798706	6.15E-08	2.80E-06	MRC2
ENSBTAG00000001032	1.908202458	0.084013314	6.16E-08	2.80E-06	PYGM
ENSBTAG00000013472	0.226453168	12.91875811	6.36E-08	2.87E-06	COL1A2
ENSBTAG00000005718	-0.24239618	8.718377662	6.83E-08	3.08E-06	PLIN2
ENSBTAG00000015253	-0.384262244	5.203786179	6.88E-08	3.09E-06	COX19
ENSBTAG00000021164	0.286250312	6.527492638	7.28E-08	3.25E-06	SLMAP
ENSBTAG00000021862	-1.560635246	0.461745506	7.44E-08	3.31E-06	SLC27A3
ENSBTAG00000021669	-0.400436709	5.899743899	7.62E-08	3.38E-06	SOGA1
ENSBTAG00000054250	-0.444494401	4.87547806	7.68E-08	3.40E-06	ENSBTAG00000054250
ENSBTAG00000019741	0.748157181	2.903010426	8.16E-08	3.60E-06	C3AR1
ENSBTAG00000002603	-0.446304734	4.870522514	8.19E-08	3.60E-06	PRPF39
ENSBTAG00000008619	-0.442812139	4.695821139	8.37E-08	3.66E-06	SAMD8
ENSBTAG00000006916	-0.298539093	6.341766608	8.46E-08	3.69E-06	TAF15
ENSBTAG00000009287	0.493012128	4.347396835	8.63E-08	3.75E-06	EBP
ENSBTAG00000020536	0.378937154	5.475018111	8.96E-08	3.88E-06	HERC6
ENSBTAG00000008068	0.281838342	6.643656936	9.15E-08	3.95E-06	ERLEC1
ENSBTAG00000004742	-0.28593411	6.923448966	9.30E-08	4.00E-06	RUNX1
ENSBTAG00000021381	-0.282586912	6.973670172	9.38E-08	4.02E-06	DAAM2
ENSBTAG00000015226	-0.426670481	5.110102961	9.88E-08	4.22E-06	BRSK1
ENSBTAG00000003228	0.242631218	9.133630233	1.00E-07	4.26E-06	RPL3
ENSBTAG00000021685	-0.842354102	2.893001415	1.02E-07	4.32E-06	EEF1A2
ENSBTAG00000012577	-0.394201151	5.785429032	1.05E-07	4.43E-06	UVSSA
ENSBTAG00000006021	-0.375244237	5.331071145	1.06E-07	4.45E-06	CEP250
ENSBTAG00000003319	-0.315828405	6.205347642	1.06E-07	4.45E-06	FLRT3
ENSBTAG00000047648	-1.64203742	0.38422933	1.11E-07	4.64E-06	SYT2
ENSBTAG00000001139	-0.602260861	3.538928995	1.12E-07	4.67E-06	ACHE
ENSBTAG00000004079	-0.276685921	7.331823484	1.15E-07	4.76E-06	ZNF106
ENSBTAG00000015238	0.526306153	4.513165953	1.18E-07	4.89E-06	DSC3
ENSBTAG00000002507	0.228952488	9.948926539	1.18E-07	4.89E-06	ATP5F1A
ENSBTAG00000019158	-0.556203784	3.75943139	1.19E-07	4.91E-06	MEX3A
ENSBTAG00000003851	-0.441127914	4.78455845	1.21E-07	4.97E-06	CCNL1
ENSBTAG00000026199	0.225222397	11.72057549	1.24E-07	5.09E-06	ACTB
ENSBTAG00000022169	0.839854914	3.250974482	1.26E-07	5.12E-06	PREX2
ENSBTAG00000000014	0.268673048	7.381329592	1.29E-07	5.24E-06	TXN2
ENSBTAG00000005753	-0.521211267	4.22948507	1.36E-07	5.49E-06	PARP6
ENSBTAG00000018598	0.361217827	5.425525723	1.36E-07	5.49E-06	HSPB6
ENSBTAG00000020538	0.728943375	3.173337289	1.39E-07	5.59E-06	HERC5
ENSBTAG00000007066	-0.371726997	5.278801441	1.42E-07	5.71E-06	TMTC4
ENSBTAG00000019187	-0.291963354	7.508939713	1.47E-07	5.87E-06	ZNF462
ENSBTAG00000004316	-0.285975733	6.820045809	1.52E-07	6.05E-06	BOD1L1
ENSBTAG00000004037	-0.281138832	7.431932528	1.58E-07	6.27E-06	JUN
ENSBTAG00000019908	-0.314536955	6.266832479	1.59E-07	6.29E-06	CUL9
ENSBTAG00000007331	-0.235070799	11.18533119	1.65E-07	6.52E-06	PLOD2
ENSBTAG00000017999	-0.273610544	6.846591207	1.70E-07	6.68E-06	TNRC6A
ENSBTAG00000004094	0.657333746	3.377067143	1.71E-07	6.68E-06	SPARCL1
ENSBTAG00000012634	0.299291532	6.112070084	1.71E-07	6.69E-06	NDUFB7
ENSBTAG00000051082	-0.443575831	6.401993573	1.73E-07	6.73E-06	ENSBTAG00000051082
ENSBTAG00000004249	-0.316231801	6.21927953	1.75E-07	6.80E-06	TANC2
ENSBTAG00000021288	0.266929697	7.009976293	1.79E-07	6.90E-06	PSMB4
ENSBTAG00000002827	0.283914865	6.778861329	1.79E-07	6.90E-06	ACAT2
ENSBTAG00000013107	-0.394127159	5.161461053	1.84E-07	7.05E-06	SHANK1
ENSBTAG00000014903	-0.335457388	5.660544097	1.84E-07	7.05E-06	ABCA3
ENSBTAG00000047061	-0.410934068	5.308713424	1.86E-07	7.10E-06	NDOR1
ENSBTAG00000047254	-0.587638664	3.990761631	1.89E-07	7.20E-06	ABCA2
ENSBTAG00000001790	-0.301350391	6.122139965	1.89E-07	7.20E-06	SAFB2
ENSBTAG00000021076	-0.395562954	5.427212057	2.02E-07	7.66E-06	TNRC6B
ENSBTAG00000018053	-0.296443688	6.007229141	2.09E-07	7.88E-06	RAB22A
ENSBTAG00000020619	-0.281117726	7.71971504	2.14E-07	8.02E-06	PKD1
ENSBTAG00000009405	0.388525127	5.008615027	2.14E-07	8.02E-06	TRPC4
ENSBTAG00000018164	0.315819088	6.021133532	2.14E-07	8.02E-06	FNDC4
ENSBTAG00000053453	-1.639358042	0.324573926	2.15E-07	8.03E-06	ENSBTAG00000053453
ENSBTAG00000018813	0.270727511	6.691765002	2.20E-07	8.20E-06	IDH3B
ENSBTAG00000013289	-0.24423229	8.661642885	2.35E-07	8.70E-06	PHF8
ENSBTAG00000014543	-1.122404364	1.804239345	2.35E-07	8.70E-06	PLXNA4
ENSBTAG00000013798	-0.455649378	4.695951978	2.44E-07	8.99E-06	PTPRN
ENSBTAG00000026369	0.227227265	8.234466562	2.45E-07	9.01E-06	ENC1
ENSBTAG00000001059	0.312173916	5.898507348	2.46E-07	9.02E-06	IDH3G
ENSBTAG00000016890	-0.297387171	6.15370023	2.50E-07	9.13E-06	ANKS1A
ENSBTAG00000006328	-0.33741589	5.547869624	2.68E-07	9.75E-06	RBM6
ENSBTAG00000009725	0.636511077	3.640356287	2.70E-07	9.81E-06	AOX1
ENSBTAG00000012247	-0.233028362	9.135502218	2.80E-07	1.01E-05	MXRA8
ENSBTAG00000003622	-0.927097301	2.027092096	2.86E-07	1.03E-05	ZKSCAN7
ENSBTAG00000032680	-0.237104794	8.44541241	2.93E-07	1.05E-05	TMEM63B
ENSBTAG00000032657	-0.451943435	4.875472107	3.05E-07	1.09E-05	TEAD1
ENSBTAG00000002321	-0.663876151	3.838974819	3.25E-07	1.16E-05	AMT
ENSBTAG00000004081	-0.46093275	4.347704404	3.27E-07	1.17E-05	FAT3
ENSBTAG00000001024	-0.283954731	7.538967926	3.36E-07	1.19E-05	ARID1A
ENSBTAG00000011998	0.39742116	4.906770788	3.36E-07	1.19E-05	DUT
ENSBTAG00000016514	0.2399523	7.490560976	3.43E-07	1.21E-05	CPE
ENSBTAG00000017517	-0.570818604	4.428528061	3.49E-07	1.23E-05	ZNF236
ENSBTAG00000000705	0.280718077	6.435291944	3.53E-07	1.24E-05	COX7A2L
ENSBTAG00000003067	0.286299719	6.552070718	3.61E-07	1.27E-05	PSMB7
ENSBTAG00000017075	-0.504578432	4.488700918	3.87E-07	1.35E-05	STX1A
ENSBTAG00000024708	-0.28434567	6.750915479	3.89E-07	1.36E-05	CABIN1
ENSBTAG00000016771	0.472843238	4.502677308	3.92E-07	1.37E-05	PLK2
ENSBTAG00000000905	-0.496651322	4.105948439	4.15E-07	1.44E-05	RAB6B
ENSBTAG00000006835	-0.607890028	3.362710686	4.21E-07	1.45E-05	MCAM
ENSBTAG00000010519	-0.338854257	5.756363448	4.25E-07	1.46E-05	NEURL4
ENSBTAG00000045625	-2.044754363	0.63452167	4.31E-07	1.48E-05	NTN3
ENSBTAG00000019414	-0.52873304	3.995561462	4.44E-07	1.52E-05	CLK4
ENSBTAG00000015293	0.419063165	4.544885107	4.49E-07	1.54E-05	NXPH3
ENSBTAG00000016169	-0.383801517	5.319693277	4.52E-07	1.54E-05	ID1
ENSBTAG00000048800	-0.34270272	5.819993583	4.56E-07	1.55E-05	ENSBTAG00000048800
ENSBTAG00000001123	-0.674544801	2.927458273	4.57E-07	1.55E-05	SNRNP48
ENSBTAG00000005580	-0.301864903	5.98046424	4.82E-07	1.63E-05	SZT2
ENSBTAG00000000423	-0.494617049	4.090747126	4.82E-07	1.63E-05	RBM4B
ENSBTAG00000016448	-0.432544522	4.879649456	4.85E-07	1.63E-05	ZBTB40
ENSBTAG00000019767	-0.437825331	4.714239391	4.88E-07	1.64E-05	MIER2
ENSBTAG00000023745	-0.572822444	3.57690406	4.93E-07	1.65E-05	BANP
ENSBTAG00000019615	0.263347233	6.681820389	4.96E-07	1.66E-05	PHTF1
ENSBTAG00000000395	1.806806762	0.242552583	5.24E-07	1.74E-05	ADAMTS20
ENSBTAG00000015801	-0.345431973	5.495633021	5.30E-07	1.76E-05	EFNB1
ENSBTAG00000008465	0.558470567	3.584346438	5.41E-07	1.79E-05	ACCS
ENSBTAG00000008614	1.83540171	0.326576897	5.45E-07	1.80E-05	KASH5
ENSBTAG00000016484	0.479786906	4.262850578	5.71E-07	1.88E-05	ATP11C
ENSBTAG00000005754	0.274475988	6.648162764	5.75E-07	1.89E-05	PPM1K
ENSBTAG00000049058	-0.360816157	5.299349344	5.79E-07	1.90E-05	INHBB
ENSBTAG00000054512	-1.126056709	1.342381987	5.97E-07	1.95E-05	IGSF1
ENSBTAG00000040006	0.288550762	6.592455363	6.20E-07	2.02E-05	SRSF3
ENSBTAG00000015794	-0.201232265	11.37892462	6.21E-07	2.02E-05	NES
ENSBTAG00000020541	0.285230773	6.248053837	6.26E-07	2.03E-05	PIGY
ENSBTAG00000006676	-0.259004044	6.662889	6.27E-07	2.03E-05	FIBIN
ENSBTAG00000034138	-0.409461856	4.788035419	6.31E-07	2.03E-05	ENSBTAG00000034138
ENSBTAG00000044053	0.217868541	8.278283821	6.33E-07	2.03E-05	SLC17A5
ENSBTAG00000014229	-1.122853369	1.35638535	6.33E-07	2.03E-05	SYT17
ENSBTAG00000020895	0.802708832	2.886383845	6.37E-07	2.04E-05	LOXL4
ENSBTAG00000015165	-0.451592601	4.253679998	6.38E-07	2.04E-05	DPY19L3
ENSBTAG00000001506	-0.240620678	7.600516426	6.62E-07	2.11E-05	HTT
ENSBTAG00000011064	-0.452789356	4.542884845	6.73E-07	2.14E-05	ADCK5
ENSBTAG00000014137	-0.456931294	4.679588217	6.87E-07	2.18E-05	CEP164
ENSBTAG00000019210	-0.732863649	2.833872549	6.96E-07	2.20E-05	ADCY2
ENSBTAG00000017388	-0.359257433	5.330836279	6.98E-07	2.20E-05	SVBP
ENSBTAG00000006720	0.387981784	4.839628082	7.00E-07	2.20E-05	GJA5
ENSBTAG00000017605	0.248005071	6.791892578	7.18E-07	2.25E-05	AK2
ENSBTAG00000005353	-0.367600193	5.558574082	7.54E-07	2.36E-05	DES
ENSBTAG00000020911	-0.356629596	5.493674596	7.81E-07	2.44E-05	FNBP4
ENSBTAG00000016501	0.250141631	7.920569049	7.88E-07	2.45E-05	ARHGAP1
ENSBTAG00000025775	-1.403627854	0.403575528	8.06E-07	2.50E-05	INSL3
ENSBTAG00000018723	-1.093501262	1.371823081	8.24E-07	2.55E-05	SLC25A34
ENSBTAG00000016598	-0.21071141	10.70541492	8.45E-07	2.61E-05	DYNC1H1
ENSBTAG00000019611	-0.357137672	5.135080346	8.97E-07	2.76E-05	MAGI3
ENSBTAG00000018247	-0.253543857	6.681175719	8.99E-07	2.76E-05	OCRL
ENSBTAG00000015114	-0.212809507	9.787303325	9.02E-07	2.76E-05	CALR
ENSBTAG00000005077	-0.419845628	4.852055244	9.35E-07	2.86E-05	CXCL12
ENSBTAG00000012432	0.272991292	7.026225381	9.48E-07	2.89E-05	FDFT1
ENSBTAG00000002202	-0.440145665	4.582184	9.51E-07	2.90E-05	CRAMP1
ENSBTAG00000002774	-0.257700253	7.122939411	9.70E-07	2.94E-05	PTPN23
ENSBTAG00000011975	0.365259212	5.131047653	9.73E-07	2.95E-05	SERPINB1
ENSBTAG00000021920	-0.321534231	5.541360495	9.98E-07	3.01E-05	SEMA4C
ENSBTAG00000034220	0.669514963	3.417234947	1.01E-06	3.03E-05	ENSBTAG00000034220
ENSBTAG00000009757	0.220236933	9.500429531	1.01E-06	3.05E-05	RPSA
ENSBTAG00000009343	-0.331484092	6.99315083	1.02E-06	3.07E-05	AAK1
ENSBTAG00000001675	-0.319668958	5.720629433	1.03E-06	3.07E-05	ITPKA
ENSBTAG00000019150	0.20182731	10.43140238	1.11E-06	3.32E-05	PLD3
ENSBTAG00000033089	0.571984438	3.361260649	1.13E-06	3.36E-05	HACD1
ENSBTAG00000010534	-0.213150637	8.397796585	1.16E-06	3.44E-05	MPRIP
ENSBTAG00000006185	0.480108879	4.28810258	1.17E-06	3.47E-05	SPC24
ENSBTAG00000046337	0.272307779	7.740547463	1.18E-06	3.47E-05	TUBB6
ENSBTAG00000010509	-0.924949007	1.888690796	1.21E-06	3.56E-05	CDK3
ENSBTAG00000011483	-0.911208603	2.085995937	1.25E-06	3.68E-05	SCARF1
ENSBTAG00000004990	-0.253051642	6.925458149	1.27E-06	3.72E-05	NEO1
ENSBTAG00000033140	-0.497990219	3.827881725	1.28E-06	3.74E-05	LRRC3B
ENSBTAG00000003183	0.224505167	7.902854681	1.28E-06	3.74E-05	NTN4
ENSBTAG00000013227	0.249923409	6.71095564	1.29E-06	3.75E-05	SNAI2
ENSBTAG00000009617	-0.212279395	9.319724159	1.29E-06	3.75E-05	SLC2A1
ENSBTAG00000015467	-0.561114761	3.452329405	1.32E-06	3.82E-05	FAM184A
ENSBTAG00000000455	-0.348833693	5.847129705	1.36E-06	3.92E-05	CREBZF
ENSBTAG00000004155	0.313527452	5.811399345	1.38E-06	3.99E-05	SPATA20
ENSBTAG00000018255	0.235303364	8.354076335	1.39E-06	4.01E-05	ACTN1
ENSBTAG00000012186	0.445521226	4.593539295	1.42E-06	4.08E-05	DKKL1
ENSBTAG00000005814	0.345548476	5.304134762	1.47E-06	4.23E-05	PSME2
ENSBTAG00000020444	-0.240206823	6.815085353	1.51E-06	4.31E-05	MAST2
ENSBTAG00000010416	0.285349197	5.915297609	1.55E-06	4.43E-05	RIN3
ENSBTAG00000032996	-0.249492721	7.679584634	1.57E-06	4.46E-05	P4HA1
ENSBTAG00000004004	-0.239759499	7.01140536	1.57E-06	4.46E-05	CSDC2
ENSBTAG00000002917	-0.240074821	7.205916532	1.58E-06	4.48E-05	PRKAG2
ENSBTAG00000010775	-0.293587474	6.015046083	1.65E-06	4.67E-05	POGK
ENSBTAG00000008733	0.207491278	8.613982049	1.66E-06	4.67E-05	MAGED1
ENSBTAG00000033268	-0.543438021	3.87615302	1.67E-06	4.70E-05	ZFHX4
ENSBTAG00000011590	0.724448041	2.69966204	1.77E-06	4.96E-05	GLIPR1
ENSBTAG00000020681	-0.299527749	6.143589823	1.84E-06	5.15E-05	FNDC3A
ENSBTAG00000009086	0.29104822	6.120666668	1.84E-06	5.16E-05	LOXL1
ENSBTAG00000017701	-1.656394389	0.195797203	1.89E-06	5.28E-05	CYP2W1
ENSBTAG00000009835	-0.533648791	3.604490772	1.90E-06	5.29E-05	CACNA1G
ENSBTAG00000052394	-0.566310055	3.288894353	1.92E-06	5.34E-05	ENSBTAG00000052394
ENSBTAG00000010820	-1.057068572	1.823591265	1.94E-06	5.38E-05	WNT11
ENSBTAG00000050986	-0.776171795	2.557863733	1.96E-06	5.41E-05	PXDN
ENSBTAG00000047801	-0.400939186	4.590509011	1.99E-06	5.49E-05	CRELD2
ENSBTAG00000001405	0.29195289	6.71093001	1.99E-06	5.49E-05	GLCE
ENSBTAG00000006122	-0.239992028	8.652337963	2.00E-06	5.50E-05	HUWE1
ENSBTAG00000009719	-0.563315945	3.361947526	2.05E-06	5.61E-05	CALHM2
ENSBTAG00000039657	-0.454634874	4.350297261	2.06E-06	5.64E-05	H2AC6
ENSBTAG00000011327	0.772514842	2.861090259	2.13E-06	5.79E-05	OLFML3
ENSBTAG00000009924	0.600398804	3.222395928	2.13E-06	5.79E-05	MR1
ENSBTAG00000006391	0.293612749	5.825824531	2.17E-06	5.88E-05	NDUFAB1
ENSBTAG00000010659	-0.220819259	8.98132245	2.17E-06	5.88E-05	CUX1
ENSBTAG00000018125	-0.749465401	2.553211151	2.20E-06	5.96E-05	KIF5C
ENSBTAG00000001844	-0.294365617	5.926727806	2.23E-06	6.00E-05	MOGS
ENSBTAG00000012036	-1.158570067	1.289380626	2.23E-06	6.00E-05	HR
ENSBTAG00000010785	0.453014562	4.451496729	2.24E-06	6.01E-05	FAS
ENSBTAG00000021576	0.925654627	2.195085742	2.25E-06	6.02E-05	LMOD1
ENSBTAG00000017665	0.269202216	6.52915681	2.26E-06	6.06E-05	DHRS4
ENSBTAG00000011613	0.214804083	8.284850884	2.27E-06	6.07E-05	PLS3
ENSBTAG00000033642	-0.831418884	2.242544952	2.35E-06	6.26E-05	ENSBTAG00000033642
ENSBTAG00000003291	-0.405202717	4.645930902	2.42E-06	6.44E-05	RIMKLB
ENSBTAG00000010052	-0.507965758	3.887313982	2.46E-06	6.51E-05	EXD2
ENSBTAG00000012674	-0.233097629	7.13727114	2.46E-06	6.51E-05	CNKSR3
ENSBTAG00000010815	-0.270255805	6.277197842	2.56E-06	6.76E-05	CAMKK2
ENSBTAG00000010439	-0.438846061	4.246321391	2.57E-06	6.76E-05	AKAP8L
ENSBTAG00000015142	-0.330884332	5.481215104	2.58E-06	6.78E-05	MAPKBP1
ENSBTAG00000008353	0.21545558	9.030189841	2.61E-06	6.85E-05	CDKN1A
ENSBTAG00000015109	-0.228260882	7.204461321	2.65E-06	6.92E-05	TOB2
ENSBTAG00000037703	-0.199047888	9.092491459	2.65E-06	6.92E-05	MICALL1
ENSBTAG00000010153	0.465588002	4.754195577	2.65E-06	6.92E-05	ANXA3
ENSBTAG00000003340	0.40939926	4.808789022	2.69E-06	6.99E-05	HDDC2
ENSBTAG00000012854	-1.779914843	0.430053938	2.70E-06	7.00E-05	GSDMB
ENSBTAG00000023736	0.324994992	5.441317689	2.71E-06	7.01E-05	CDC42EP3
ENSBTAG00000012444	-0.441818526	5.16753096	2.76E-06	7.13E-05	ADAM12
ENSBTAG00000009918	-0.403505172	5.106979338	2.78E-06	7.18E-05	GSE1
ENSBTAG00000046612	-0.341639894	6.099039881	2.83E-06	7.29E-05	ZNF292
ENSBTAG00000017442	-0.28379696	6.094737866	2.85E-06	7.31E-05	CDO1
ENSBTAG00000014863	0.376310532	4.767992144	2.85E-06	7.31E-05	GYPC
ENSBTAG00000009938	-0.31491115	6.151965584	2.86E-06	7.31E-05	XCL1
ENSBTAG00000020417	0.232988393	7.949709881	2.88E-06	7.35E-05	DAPK3
ENSBTAG00000011182	0.245431227	7.385932074	2.90E-06	7.40E-05	PDLIM1
ENSBTAG00000000586	-0.343790803	5.705797074	2.97E-06	7.55E-05	CPLANE1
ENSBTAG00000046841	-0.239001469	7.092060633	3.02E-06	7.67E-05	IRF2BP2
ENSBTAG00000017733	0.370098822	5.159498705	3.14E-06	7.94E-05	CA2
ENSBTAG00000052989	0.265483869	6.569199815	3.16E-06	7.98E-05	FZD8
ENSBTAG00000052909	-0.683040818	2.761904083	3.19E-06	8.04E-05	C8G
ENSBTAG00000001193	0.365642416	5.014378261	3.22E-06	8.11E-05	UNC93B1
ENSBTAG00000046266	0.941062746	1.789329067	3.27E-06	8.21E-05	TNFSF9
ENSBTAG00000052720	0.274581867	7.387091282	3.37E-06	8.44E-05	ENSBTAG00000052720
ENSBTAG00000002944	0.243260256	7.80679692	3.38E-06	8.44E-05	ATP5MC3
ENSBTAG00000039888	0.215108546	8.389380947	3.38E-06	8.44E-05	MAGED2
ENSBTAG00000004165	0.280676681	5.933994796	3.49E-06	8.70E-05	CLYBL
ENSBTAG00000039138	0.309978656	5.661971993	3.56E-06	8.83E-05	MRPL41
ENSBTAG00000000291	-0.262332406	6.696400273	3.56E-06	8.83E-05	DHTKD1
ENSBTAG00000046110	-0.906007695	1.835152968	3.57E-06	8.84E-05	CLCF1
ENSBTAG00000014490	-0.238028352	6.989285892	3.58E-06	8.85E-05	DDX39B
ENSBTAG00000049435	-0.70863345	2.61188472	3.60E-06	8.87E-05	C21H14orf132
ENSBTAG00000009199	-0.358877068	5.60405616	3.60E-06	8.87E-05	GLIS2
ENSBTAG00000020758	-0.301820479	5.560059177	3.61E-06	8.87E-05	MAP3K12
ENSBTAG00000005501	-0.242889096	7.042271131	3.68E-06	9.02E-05	COBLL1
ENSBTAG00000008842	-0.554882495	3.443937548	3.70E-06	9.06E-05	JPH1
ENSBTAG00000007986	-0.269342548	6.149353958	3.88E-06	9.48E-05	NSD2
ENSBTAG00000015437	0.295511273	5.701983221	3.89E-06	9.48E-05	NTMT1
ENSBTAG00000043570	0.263051698	7.941736651	3.90E-06	9.48E-05	ENSBTAG00000043570
ENSBTAG00000012820	-0.383845865	4.721518137	3.97E-06	9.65E-05	STX3
ENSBTAG00000054495	-1.807983517	0.397084383	4.01E-06	9.73E-05	ENSBTAG00000054495
ENSBTAG00000001529	-0.283031419	6.276671406	4.18E-06	0.000101145	NSD3
ENSBTAG00000048781	0.233080736	7.492587062	4.20E-06	0.000101285	ENSBTAG00000048781
ENSBTAG00000016936	-0.449817168	4.453421592	4.21E-06	0.000101537	MISP3
ENSBTAG00000010644	-0.302803581	5.710107284	4.23E-06	0.00010182	CHST11
ENSBTAG00000017389	0.19130598	10.46943997	4.24E-06	0.000101826	RPLP0
ENSBTAG00000003948	0.275572463	6.773733585	4.36E-06	0.000104461	FDPS
ENSBTAG00000021976	0.213297405	7.607039107	4.37E-06	0.00010459	NDUFS1
ENSBTAG00000012644	0.340516894	5.246571615	4.41E-06	0.000105296	UROD
ENSBTAG00000016103	-0.245837528	6.748970685	4.62E-06	0.000109954	CBFB
ENSBTAG00000007540	0.233134069	7.092654674	4.63E-06	0.00010997	GLUD1
ENSBTAG00000001902	-0.378636058	5.19849575	4.79E-06	0.00011358	CEP295
ENSBTAG00000010508	0.363757492	4.932800208	4.82E-06	0.000114122	BLVRB
ENSBTAG00000014906	-0.204557729	10.13090651	4.94E-06	0.000116727	VCAN
ENSBTAG00000018449	-0.202946008	8.32628065	5.02E-06	0.000118111	NUMA1
ENSBTAG00000010819	-0.404434908	4.948144222	5.02E-06	0.000118111	HMBOX1
ENSBTAG00000018810	-0.191966752	11.31803741	5.03E-06	0.000118111	THBS2
ENSBTAG00000015798	-0.346573377	5.084166091	5.09E-06	0.000119496	UCKL1
ENSBTAG00000006075	0.227973021	7.301430695	5.12E-06	0.000119855	SUCLG1
ENSBTAG00000032902	-0.327829549	5.219401619	5.27E-06	0.000123064	ENSBTAG00000032902
ENSBTAG00000021743	-0.456071985	3.974677916	5.31E-06	0.000123872	ZNF704
ENSBTAG00000018278	0.223849301	7.010702813	5.33E-06	0.000124183	ATP5PO
ENSBTAG00000031279	0.377578498	5.020747751	5.64E-06	0.000131103	SELENOM
ENSBTAG00000037377	-0.329106546	5.688699665	5.71E-06	0.000132499	ABHD14B
ENSBTAG00000006688	-0.356557227	5.277126198	5.73E-06	0.000132577	RPS6KL1
ENSBTAG00000011447	-1.172773095	1.025154751	5.74E-06	0.000132709	FAM171A2
ENSBTAG00000005008	-0.234485886	7.166955109	5.78E-06	0.000133332	WSB1
ENSBTAG00000018103	0.226739015	7.578376125	5.81E-06	0.000133783	HMGB1
ENSBTAG00000000205	0.230521498	8.553632684	5.83E-06	0.000134002	MMD
ENSBTAG00000012243	-0.285705797	5.621242529	5.91E-06	0.000135577	POLR1E
ENSBTAG00000054728	-0.990929793	1.343940829	6.05E-06	0.000138562	ENSBTAG00000054728
ENSBTAG00000046957	-1.844753658	0.542160117	6.14E-06	0.000140396	DOK6
ENSBTAG00000021252	-1.014485473	1.741475164	6.20E-06	0.000141424	TMEM35A
ENSBTAG00000010709	0.248890608	6.723750624	6.37E-06	0.00014497	DLAT
ENSBTAG00000040398	-0.243714766	6.908668668	6.47E-06	0.000147055	CRACD
ENSBTAG00000015669	-0.525926137	3.756776858	6.54E-06	0.000148363	ADAT1
ENSBTAG00000017019	-0.261530351	6.622098503	6.57E-06	0.000148583	PRKDC
ENSBTAG00000019208	-0.549238259	3.257639669	6.57E-06	0.000148583	C29H11orf95
ENSBTAG00000000177	0.26705389	6.406998589	6.91E-06	0.000155951	MSLN
ENSBTAG00000005370	-0.348897115	5.890961342	7.12E-06	0.000160244	TMTC1
ENSBTAG00000001279	-0.411558668	4.530537843	7.24E-06	0.000162635	MPP2
ENSBTAG00000012348	-0.867188559	2.187035082	7.25E-06	0.000162635	LRRC71
ENSBTAG00000051311	-1.033691113	1.517352083	7.26E-06	0.000162657	ENSBTAG00000051311
ENSBTAG00000011649	0.288491799	5.849140299	7.32E-06	0.000163643	FARSB
ENSBTAG00000000362	-0.244776542	6.831405724	7.35E-06	0.000164034	SPG11
ENSBTAG00000020815	-0.27554923	5.810221588	7.57E-06	0.000168519	UHRF2
ENSBTAG00000017077	0.236759759	6.916614497	7.64E-06	0.000169822	CTSV
ENSBTAG00000053372	-0.354085384	4.986033683	7.71E-06	0.000171156	TOP3B
ENSBTAG00000013588	-0.292936244	5.61861361	7.80E-06	0.000172636	ZNF532
ENSBTAG00000016762	0.272058829	6.326982716	7.82E-06	0.000172636	SLC25A12
ENSBTAG00000007173	-0.239356971	7.30225575	7.82E-06	0.000172636	PDGFRA
ENSBTAG00000030599	-0.594768332	3.176570349	7.97E-06	0.000175631	SMOC1
ENSBTAG00000013615	-0.244286468	6.276315484	7.98E-06	0.000175631	CHORDC1
ENSBTAG00000010389	0.217601196	7.876969996	8.00E-06	0.000175631	STBD1
ENSBTAG00000008717	-0.266094184	6.400011815	8.05E-06	0.000176433	SERPINE2
ENSBTAG00000039861	0.683784239	2.952768529	8.08E-06	0.000176712	OAS1Y
ENSBTAG00000019312	-0.349515154	4.928212542	8.38E-06	0.000182938	TFCP2
ENSBTAG00000013250	-0.224211985	6.881386212	8.50E-06	0.000185329	PCSK1N
ENSBTAG00000001619	-0.286718477	5.6081194	8.60E-06	0.000187128	SERINC5
ENSBTAG00000013460	-0.372617477	4.550931046	8.80E-06	0.000191301	ZBTB11
ENSBTAG00000011403	-0.229715184	6.792458703	8.86E-06	0.000192251	RUSC2
ENSBTAG00000008026	-1.508322416	0.13466693	8.90E-06	0.000192701	OXT
ENSBTAG00000021808	-0.253651372	5.998663111	9.75E-06	0.000210669	CACNB3
ENSBTAG00000019182	-0.316994605	5.359316817	1.01E-05	0.000217323	TIA1
ENSBTAG00000030334	-0.907636317	1.680960312	1.01E-05	0.000217942	AOC2
ENSBTAG00000019197	-0.246328783	6.261300208	1.02E-05	0.000218851	TASOR2
ENSBTAG00000020097	0.315060916	5.748187005	1.02E-05	0.000218851	PERP
ENSBTAG00000002910	0.367172414	4.634003903	1.03E-05	0.000220922	ECHDC2
ENSBTAG00000021457	0.267984311	6.003803426	1.04E-05	0.000223305	EFEMP2
ENSBTAG00000012278	0.360521179	4.769270757	1.06E-05	0.000226797	MTMR12
ENSBTAG00000005514	-0.211830177	7.743832403	1.08E-05	0.000229972	TRIO
ENSBTAG00000039719	0.233097014	7.061411336	1.11E-05	0.00023544	PHGDH
ENSBTAG00000018082	0.236460923	7.363514216	1.11E-05	0.000236095	QPRT
ENSBTAG00000004570	0.583220741	3.542071942	1.12E-05	0.000236507	PRRX1
ENSBTAG00000000266	-0.223924424	7.6240267	1.12E-05	0.000237271	NAB1
ENSBTAG00000020159	-0.404075212	4.189311929	1.13E-05	0.000239469	NKAIN1
ENSBTAG00000013579	-0.215404188	7.366800535	1.14E-05	0.000239469	SARAF
ENSBTAG00000055082	0.221182282	6.772616599	1.14E-05	0.000239469	COX6B1
ENSBTAG00000039688	0.63082037	2.728647081	1.15E-05	0.00024098	RFLNA
ENSBTAG00000006933	-0.253210404	6.24487944	1.16E-05	0.000244089	PPP1R10
ENSBTAG00000015310	-0.262113733	6.728979764	1.18E-05	0.000246762	SLC25A36
ENSBTAG00000008373	-1.17142095	1.245324096	1.19E-05	0.000248436	ITGA10
ENSBTAG00000054239	-0.246048536	7.106577091	1.21E-05	0.000253473	ENSBTAG00000054239
ENSBTAG00000032360	0.343369866	5.327101028	1.23E-05	0.000257333	NAP1L1
ENSBTAG00000014923	0.314396302	5.489280534	1.28E-05	0.000266533	BBS2
ENSBTAG00000030247	-0.345525653	4.860648473	1.32E-05	0.000274117	NSMF
ENSBTAG00000018339	0.294696877	5.617396505	1.32E-05	0.000274613	ATP5MC1
ENSBTAG00000015339	-0.534794953	3.298001846	1.33E-05	0.00027559	ENDOV
ENSBTAG00000002586	-0.232551018	7.568795081	1.35E-05	0.000278605	TCF12
ENSBTAG00000019091	-0.478064967	3.77011473	1.35E-05	0.000278605	RNPC3
ENSBTAG00000013745	-0.184635655	9.465134174	1.36E-05	0.0002799	ITGA5
ENSBTAG00000008124	-0.564346428	3.405220573	1.36E-05	0.0002799	GK
ENSBTAG00000004804	-0.308117685	5.272360921	1.38E-05	0.000283367	RRN3
ENSBTAG00000013930	0.219352003	7.536273474	1.39E-05	0.000284578	ATP5F1C
ENSBTAG00000021520	-0.315160491	5.642727517	1.45E-05	0.000297037	DDX46
ENSBTAG00000012441	-0.292581216	5.60861563	1.46E-05	0.00029846	SMAD7
ENSBTAG00000009488	-0.399527888	4.523025436	1.46E-05	0.00029846	NXF1
ENSBTAG00000011956	1.112218767	1.078964462	1.49E-05	0.0003029	CNNM1
ENSBTAG00000014912	0.191232242	8.702327177	1.50E-05	0.000304242	FMOD
ENSBTAG00000003279	0.24356178	6.664752898	1.50E-05	0.000304812	NDUFA10
ENSBTAG00000037907	-0.225408824	7.433581987	1.55E-05	0.000313637	DSEL
ENSBTAG00000001225	-0.245248896	6.313076241	1.55E-05	0.000314199	RBM14
ENSBTAG00000009874	-0.432592887	3.958745991	1.56E-05	0.000314199	ZXDC
ENSBTAG00000018909	-0.229498501	6.727259616	1.57E-05	0.000317047	CREB5
ENSBTAG00000010529	0.228394718	6.444811892	1.58E-05	0.000317795	FZD6
ENSBTAG00000026819	-0.23756115	6.426200433	1.61E-05	0.000323043	HDAC7
ENSBTAG00000051775	-1.211892448	0.555774197	1.61E-05	0.000323882	ENSBTAG00000051775
ENSBTAG00000014469	-0.372934007	5.786955516	1.62E-05	0.000323882	NBEAL1
ENSBTAG00000005681	0.20143613	7.433773727	1.62E-05	0.000323882	ME1
ENSBTAG00000001160	-0.399270177	4.280906115	1.68E-05	0.000334707	GMEB1
ENSBTAG00000000053	-0.332891528	5.362283335	1.69E-05	0.000336262	FILIP1
ENSBTAG00000021025	0.208171207	7.537796184	1.69E-05	0.000336262	P3H2
ENSBTAG00000005658	0.52144442	3.363535658	1.70E-05	0.00033831	ECE2
ENSBTAG00000030646	-0.412819093	4.071561527	1.71E-05	0.0003389	KCTD17
ENSBTAG00000004292	-0.433229254	4.064527313	1.72E-05	0.000340937	CRMP1
ENSBTAG00000008789	0.209488178	7.509242863	1.73E-05	0.000340937	HMG20B
ENSBTAG00000017867	-0.539402143	3.294658999	1.73E-05	0.000340937	YPEL1
ENSBTAG00000021052	-0.366203602	4.525883182	1.73E-05	0.000340937	GNB1L
ENSBTAG00000005757	-0.242822704	7.660384215	1.74E-05	0.000342071	FUS
ENSBTAG00000011126	-0.257500372	5.927552119	1.75E-05	0.000343512	STK38
ENSBTAG00000054628	-0.222610861	6.732606822	1.77E-05	0.000347982	PMEPA1
ENSBTAG00000027444	-0.213007809	6.868604556	1.78E-05	0.000349683	SVIL
ENSBTAG00000011875	-0.223961366	6.987756165	1.84E-05	0.000360057	CLIP2
ENSBTAG00000003740	-0.250979615	6.152558891	1.85E-05	0.000362102	KDM6A
ENSBTAG00000054188	-0.213210739	7.274015788	1.87E-05	0.000363663	CMTM3
ENSBTAG00000013001	-0.520542985	3.544467468	1.87E-05	0.000363663	ZNF84
ENSBTAG00000005574	0.193641565	9.03632244	1.87E-05	0.000363663	CLU
ENSBTAG00000016152	0.2444406	6.731923198	1.88E-05	0.000364056	DAB2
ENSBTAG00000007678	0.197389557	8.203216389	1.92E-05	0.000371931	MKX
ENSBTAG00000021260	0.325152763	4.975201869	1.93E-05	0.000373549	GALNT11
ENSBTAG00000040555	-0.261797228	6.040276618	1.97E-05	0.000381421	FBXL19
ENSBTAG00000004010	-0.316520758	5.568711082	1.98E-05	0.000382218	PAPPA
ENSBTAG00000003068	0.209131195	7.865284477	1.99E-05	0.000382847	MSMO1
ENSBTAG00000008251	-0.248598907	6.177366875	2.01E-05	0.00038627	SNRPN
ENSBTAG00000015251	-0.719543057	2.301860408	2.01E-05	0.000386275	ENSBTAG00000015251
ENSBTAG00000034827	-0.258900874	6.005216013	2.02E-05	0.000387125	PDGFD
ENSBTAG00000014316	-0.238851278	6.390817888	2.04E-05	0.000391381	HNRNPH3
ENSBTAG00000002949	-0.29922189	5.434559419	2.05E-05	0.000391717	CBX1
ENSBTAG00000005404	0.420367792	4.534769624	2.08E-05	0.000397386	MSC
ENSBTAG00000011698	-0.227598271	6.559455219	2.09E-05	0.000397766	TYK2
ENSBTAG00000000505	0.328833469	4.852308674	2.11E-05	0.000400614	KYAT3
ENSBTAG00000002782	-0.216276034	6.805921807	2.11E-05	0.000401166	ZC3H7B
ENSBTAG00000040602	0.210873286	7.501059634	2.17E-05	0.000411635	ENSBTAG00000040602
ENSBTAG00000012898	0.258399706	6.208444137	2.21E-05	0.000418085	RPS27L
ENSBTAG00000006108	-0.562979639	3.221355985	2.25E-05	0.000426265	MMP11
ENSBTAG00000046862	-0.229655905	7.265304716	2.27E-05	0.000427503	MARCKSL1
ENSBTAG00000015148	-0.400089981	4.438006282	2.27E-05	0.000427503	METTL3
ENSBTAG00000030434	0.232500719	7.053871385	2.27E-05	0.000427719	FUCA1
ENSBTAG00000009951	0.214983894	6.893770337	2.28E-05	0.000427719	PGP
ENSBTAG00000013662	0.368855546	4.77600073	2.32E-05	0.000435701	COL8A1
ENSBTAG00000014354	0.181881124	8.956795756	2.35E-05	0.000439033	FXYD6
ENSBTAG00000016037	0.204424232	7.100283179	2.35E-05	0.000439033	BCKDHA
ENSBTAG00000014093	0.240066355	6.066697484	2.36E-05	0.000441513	IDH2
ENSBTAG00000039962	0.354816727	4.731606053	2.38E-05	0.000443641	DCTPP1
ENSBTAG00000011172	-0.373069871	5.460687774	2.41E-05	0.000449645	ALMS1
ENSBTAG00000016336	-0.227797561	6.470285097	2.48E-05	0.00046027	OGA
ENSBTAG00000011280	-0.383014089	4.241960363	2.52E-05	0.000467628	TBKBP1
ENSBTAG00000051210	0.2148916	7.152268179	2.53E-05	0.000468634	GSTP1
ENSBTAG00000000292	-0.431430778	4.096866008	2.53E-05	0.000468634	TCIRG1
ENSBTAG00000017067	0.188597854	9.180440879	2.55E-05	0.000471055	BUD23
ENSBTAG00000009428	-0.414686833	4.182567842	2.58E-05	0.000475485	GAN
ENSBTAG00000008401	-0.339180755	5.433353845	2.59E-05	0.000477632	PFKFB3
ENSBTAG00000038889	-0.667397455	2.837666464	2.60E-05	0.000478815	RILP
ENSBTAG00000000944	-0.203086957	7.342834631	2.62E-05	0.000481492	LPCAT1
ENSBTAG00000033186	0.200514703	7.336416701	2.63E-05	0.000482127	OXCT1
ENSBTAG00000006002	-0.225009534	6.628209259	2.64E-05	0.000483477	DIDO1
ENSBTAG00000016779	-0.192655887	8.46574556	2.67E-05	0.00048876	CLIP1
ENSBTAG00000037375	-0.606952202	2.871605946	2.69E-05	0.000490923	ENSBTAG00000037375
ENSBTAG00000005384	0.216649199	6.70293155	2.69E-05	0.000491371	COPZ1
ENSBTAG00000013855	-0.206599909	7.372308727	2.70E-05	0.000492452	ORMDL3
ENSBTAG00000021991	-0.78691887	2.243404819	2.72E-05	0.000495452	TMEFF1
ENSBTAG00000009800	-1.29757956	0.133477921	2.78E-05	0.000505669	MSI1
ENSBTAG00000005432	0.205028204	7.203908949	2.80E-05	0.000507209	CAPG
ENSBTAG00000017633	0.220330851	7.005719604	2.81E-05	0.0005083	EIF1AX
ENSBTAG00000007442	-0.271885765	6.842805003	2.85E-05	0.000514761	AKAP9
ENSBTAG00000018564	-0.28583648	5.796872769	2.87E-05	0.000517318	ZFYVE27
ENSBTAG00000013727	0.288364701	5.748577382	2.89E-05	0.000521194	UMPS
ENSBTAG00000000137	-0.24630938	6.591411785	2.94E-05	0.00052931	FRYL
ENSBTAG00000054671	-0.229872707	6.889102874	2.96E-05	0.00053159	ENSBTAG00000054671
ENSBTAG00000047793	0.367893393	4.668566063	2.97E-05	0.000533744	TSSC4
ENSBTAG00000039594	-0.681572477	2.527957009	2.99E-05	0.000535291	ZNF862
ENSBTAG00000011839	0.180164204	8.846347069	3.03E-05	0.00054251	HMGCS1
ENSBTAG00000027770	-1.394657118	0.243286278	3.04E-05	0.000543438	ENSBTAG00000027770
ENSBTAG00000018783	0.217438076	7.150104215	3.10E-05	0.000553581	NELFCD
ENSBTAG00000008931	0.229652305	6.350736304	3.14E-05	0.00055882	CREG1
ENSBTAG00000020707	-0.474455747	3.876610827	3.16E-05	0.000562695	ADGRG6
ENSBTAG00000001656	0.177293513	8.7133602	3.18E-05	0.000564762	TMEM254
ENSBTAG00000013973	-1.76452867	0.686799022	3.20E-05	0.000567389	SERPIND1
ENSBTAG00000004178	0.346844772	4.53950786	3.22E-05	0.000570088	ACOX2
ENSBTAG00000023026	-0.19090323	8.380915863	3.26E-05	0.000577114	ENSBTAG00000023026
ENSBTAG00000009019	-0.215355266	7.222931137	3.29E-05	0.000580053	SH3PXD2B
ENSBTAG00000008348	-0.415927938	4.020718737	3.29E-05	0.000580053	NOL4L
ENSBTAG00000024095	-0.189910796	7.748666144	3.30E-05	0.000581598	THRAP3
ENSBTAG00000001564	0.255853958	6.481403254	3.33E-05	0.000585676	PDE4DIP
ENSBTAG00000053107	0.206457664	7.604479591	3.35E-05	0.000588794	COX5B
ENSBTAG00000016664	0.455407811	3.788554101	3.37E-05	0.000590464	SLC2A4RG
ENSBTAG00000017810	0.445222987	4.159305267	3.48E-05	0.000610002	EFHC1
ENSBTAG00000013222	0.205892758	7.671633515	3.50E-05	0.000611701	CD109
ENSBTAG00000015277	-0.298894325	5.392661858	3.50E-05	0.000611701	PCF11
ENSBTAG00000014648	0.184121428	8.472900337	3.52E-05	0.000613607	RPN2
ENSBTAG00000017970	0.195108302	9.00049013	3.53E-05	0.000614546	ZYX
ENSBTAG00000021581	0.33014048	5.363030391	3.57E-05	0.000621814	FHOD3
ENSBTAG00000045824	-0.222060853	6.906952185	3.60E-05	0.000625917	SOX9
ENSBTAG00000013631	-0.226694854	6.302527036	3.68E-05	0.000637627	GLUL
ENSBTAG00000014567	0.208072884	7.078356436	3.68E-05	0.000638054	MYLK
ENSBTAG00000009643	-0.615616873	3.187256578	3.76E-05	0.00065099	ZBTB25
ENSBTAG00000010732	0.210026394	7.192815463	3.78E-05	0.000652817	MMP23
ENSBTAG00000003494	-0.508233597	3.776907335	3.79E-05	0.000654142	C13H20orf194
ENSBTAG00000017860	-0.426786397	4.248038201	3.82E-05	0.000657204	HIPK2
ENSBTAG00000006235	-0.208888974	6.914797871	3.90E-05	0.000670915	INTS3
ENSBTAG00000012555	-0.35567557	4.615127874	3.99E-05	0.000685791	RBM15
ENSBTAG00000012615	-0.210088141	7.553594451	4.01E-05	0.000687461	ZEB2
ENSBTAG00000020518	0.201605213	7.042056751	4.11E-05	0.000703811	PARK7
ENSBTAG00000004999	-0.243490847	8.063143446	4.13E-05	0.000705793	RESF1
ENSBTAG00000013159	-0.40942073	4.334532706	4.14E-05	0.000706652	PHF11
ENSBTAG00000006143	0.212609346	7.036001944	4.19E-05	0.000714246	CREB3L1
ENSBTAG00000007372	-1.35728947	0.168569024	4.26E-05	0.000725233	ANKRD61
ENSBTAG00000018236	-0.357067764	4.676412166	4.30E-05	0.000731396	EPB41L5
ENSBTAG00000011189	-0.297924383	5.105749641	4.33E-05	0.000734432	TJAP1
ENSBTAG00000000387	-0.270496796	5.460189114	4.33E-05	0.000734432	NICN1
ENSBTAG00000003830	0.286249834	5.563782343	4.33E-05	0.000734432	PSMB3
ENSBTAG00000007923	0.254865858	6.080202302	4.39E-05	0.000743109	LAMTOR3
ENSBTAG00000009051	-0.384128542	4.357384859	4.47E-05	0.000755946	MMP19
ENSBTAG00000002049	0.231161413	6.242878206	4.50E-05	0.000759111	HADH
ENSBTAG00000020800	-0.498486273	3.30742812	4.52E-05	0.00076176	BEND7
ENSBTAG00000039015	-0.37791198	4.419936106	4.55E-05	0.000764945	TMEM145
ENSBTAG00000016198	-0.214978355	7.213512901	4.61E-05	0.000775099	EP300
ENSBTAG00000049855	-1.258510694	0.067203732	4.64E-05	0.000778211	ENSBTAG00000049855
ENSBTAG00000012159	0.2045607	7.850952724	4.69E-05	0.000786317	CNBP
ENSBTAG00000012990	-0.367994107	4.351422757	4.71E-05	0.00078828	PUS1
ENSBTAG00000012755	-0.301995535	5.368815259	4.73E-05	0.000791338	KLC4
ENSBTAG00000022613	0.268744446	5.722687917	4.75E-05	0.000792615	CYCS
ENSBTAG00000017072	-0.282322406	5.498639268	4.81E-05	0.000801551	ZNF384
ENSBTAG00000016080	-0.234279645	7.649631467	4.86E-05	0.000808486	VPS13D
ENSBTAG00000021484	-0.322736428	4.897557689	4.91E-05	0.000816959	TSPAN18
ENSBTAG00000013735	0.222569386	6.357471677	4.95E-05	0.000821507	TBCE
ENSBTAG00000008739	-0.680209588	2.44890665	5.02E-05	0.000832273	SAMD11
ENSBTAG00000031797	-0.2054861	6.737368481	5.03E-05	0.000832569	MANF
ENSBTAG00000019550	0.521361966	3.308320915	5.29E-05	0.000874803	TBC1D2
ENSBTAG00000002107	0.207754718	6.651019654	5.31E-05	0.000876612	FZD1
ENSBTAG00000011833	-0.288500634	6.274571257	5.32E-05	0.000876612	GRIA3
ENSBTAG00000005523	-0.253810484	5.903182372	5.38E-05	0.000886418	XYLT1
ENSBTAG00000009797	-1.222482585	0.478073592	5.40E-05	0.000886738	RIMBP2
ENSBTAG00000000246	0.562348175	2.763293782	5.40E-05	0.000886738	ME3
ENSBTAG00000046786	0.196832562	7.523193397	5.44E-05	0.000892997	UQCRFS1
ENSBTAG00000019256	0.234739573	6.181964354	5.49E-05	0.000900113	GLA
ENSBTAG00000001618	-0.205400305	7.117001918	5.55E-05	0.000908193	ALPK3
ENSBTAG00000022155	0.170280153	9.517873061	5.58E-05	0.000911554	FSTL1
ENSBTAG00000016236	-0.353733313	4.89347636	5.61E-05	0.0009149	SLC12A6
ENSBTAG00000000920	-0.769993509	2.202224112	5.63E-05	0.000916838	DNAH17
ENSBTAG00000006158	-0.557413555	2.883223056	5.68E-05	0.000924375	DZIP3
ENSBTAG00000010120	0.226865206	6.402521698	5.77E-05	0.000937559	HERC3
ENSBTAG00000012182	0.863574644	1.732316057	5.80E-05	0.000939951	DIRAS3
ENSBTAG00000001473	-0.32614215	5.374700101	5.80E-05	0.000939951	ARVCF
ENSBTAG00000005305	0.353174472	5.210404122	5.86E-05	0.000948116	NTS
ENSBTAG00000008915	-0.202018417	8.363419163	5.91E-05	0.000956035	SF3B1
ENSBTAG00000006005	-0.385801657	4.032772993	5.95E-05	0.000961196	MPND
ENSBTAG00000007424	-0.329001004	4.880936322	5.96E-05	0.000961759	LIF
ENSBTAG00000021134	-0.241615297	6.153311645	6.05E-05	0.000974834	DPP9
ENSBTAG00000046514	0.221171018	7.007127675	6.12E-05	0.00098495	ASMTL
ENSBTAG00000007074	-0.466931398	3.544745852	6.17E-05	0.000990538	ZKSCAN8
ENSBTAG00000001911	-0.375246103	4.772248659	6.18E-05	0.000991535	ENSBTAG00000001911
ENSBTAG00000018729	-0.222335329	7.003504445	6.22E-05	0.000997323	SPEN
ENSBTAG00000008421	-0.234427653	6.3821718	6.25E-05	0.001000278	SCRIB
ENSBTAG00000051782	-0.308992426	5.144571074	6.30E-05	0.001006932	ATAD2
ENSBTAG00000038115	0.436105136	3.723154359	6.34E-05	0.001011312	FLYWCH2
ENSBTAG00000020281	-0.242204246	6.806080385	6.35E-05	0.001012554	NIN
ENSBTAG00000006276	0.168937246	8.898063139	6.40E-05	0.001018979	C1QTNF1
ENSBTAG00000049787	-1.184076761	0.196902088	6.41E-05	0.001019169	ENSBTAG00000049787
ENSBTAG00000007061	-0.285525345	5.280274665	6.43E-05	0.001020398	PPP2R5B
ENSBTAG00000002763	-0.24994715	5.879359201	6.45E-05	0.00102278	KMT2B
ENSBTAG00000001937	1.131018027	0.681069839	6.50E-05	0.001028888	ANAPC11
ENSBTAG00000049866	-0.359273379	4.446784802	6.53E-05	0.001032318	ENSBTAG00000049866
ENSBTAG00000000451	0.373473996	4.533456986	6.57E-05	0.001036576	TMEM126A
ENSBTAG00000012265	0.201279895	7.277838037	6.57E-05	0.001036576	VWF
ENSBTAG00000018742	0.214805865	6.637608087	6.60E-05	0.001039931	MTCH2
ENSBTAG00000020330	0.212425311	6.884699763	6.69E-05	0.001052332	BTG1
ENSBTAG00000020148	-0.967099148	1.217872863	6.70E-05	0.001052736	TEK
ENSBTAG00000021595	-0.200378646	6.766064585	6.76E-05	0.001060835	HIP1R
ENSBTAG00000013175	-0.232188436	6.036646264	6.85E-05	0.001074389	GARRE1
ENSBTAG00000007807	-0.222366619	6.162046362	6.92E-05	0.001082845	HSPA2
ENSBTAG00000051596	-1.315484638	0.017604197	6.93E-05	0.001082845	ENSBTAG00000051596
ENSBTAG00000043971	-0.19665886	7.416771948	6.93E-05	0.001082845	NOTCH3
ENSBTAG00000003054	-1.227056214	0.412224523	6.99E-05	0.001090253	INSRR
ENSBTAG00000012977	0.473097517	3.404867421	7.01E-05	0.001092213	COMTD1
ENSBTAG00000017125	0.168989123	8.828950175	7.13E-05	0.001108755	PABPC4
ENSBTAG00000004200	-0.475085216	3.579073764	7.26E-05	0.001127472	GTPBP3
ENSBTAG00000016828	0.169632209	8.544477055	7.26E-05	0.001127472	TAPBP
ENSBTAG00000019998	0.263437765	5.457767842	7.34E-05	0.001136008	HAGH
ENSBTAG00000009029	0.361360385	4.412660898	7.34E-05	0.001136008	ENSBTAG00000009029
ENSBTAG00000001120	-0.478485805	3.695159183	7.35E-05	0.001136008	CORO6
ENSBTAG00000016465	0.224497732	7.593391074	7.37E-05	0.001138811	DHCR7
ENSBTAG00000021514	0.238687877	6.08326703	7.43E-05	0.001144174	DNPEP
ENSBTAG00000016206	-0.263886511	5.794995308	7.43E-05	0.001144174	MAOA
ENSBTAG00000020613	0.272200041	5.551724058	7.47E-05	0.001148885	STK16
ENSBTAG00000001514	-0.856472132	1.373599552	7.50E-05	0.001152364	ASB11
ENSBTAG00000002377	0.256703529	5.808961827	7.51E-05	0.001152614	PSMB2
ENSBTAG00000008939	-0.328774955	4.890438527	7.52E-05	0.001152858	DNMBP
ENSBTAG00000038640	-0.576059376	2.631520809	7.62E-05	0.00116583	ENSBTAG00000038640
ENSBTAG00000006581	-0.385836116	4.269299686	7.62E-05	0.00116583	CCDC82
ENSBTAG00000004806	-0.259686415	5.513806016	7.72E-05	0.001179636	PHKB
ENSBTAG00000047743	0.362802522	4.612412232	7.81E-05	0.001190978	KCNIP4
ENSBTAG00000011011	-0.313940904	5.072566141	7.82E-05	0.001190978	SSH2
ENSBTAG00000055174	-1.256724295	0.074561495	7.86E-05	0.00119296	ENSBTAG00000055174
ENSBTAG00000019060	-0.635466124	2.566478577	7.86E-05	0.00119296	CLDN11
ENSBTAG00000006441	0.196787112	7.115633534	7.86E-05	0.00119296	ATP5PB
ENSBTAG00000012074	-0.895121275	1.408743243	7.89E-05	0.001195956	MYB
ENSBTAG00000003039	0.477794967	3.71253231	7.91E-05	0.001198214	PSMB8
ENSBTAG00000004871	0.205567734	6.884116615	7.96E-05	0.001203351	NDUFV2
ENSBTAG00000047299	0.26721973	5.659397793	8.13E-05	0.001228118	DGCR6L
ENSBTAG00000020257	-0.293090764	5.712648085	8.14E-05	0.001228547	PTPN5
ENSBTAG00000009097	0.38457554	4.094852733	8.18E-05	0.00123157	FANCI
ENSBTAG00000009772	1.109935637	0.601502205	8.18E-05	0.00123157	LIX1
ENSBTAG00000046979	0.186102585	7.614011633	8.20E-05	0.001232559	LGMN
ENSBTAG00000009541	0.185529762	7.488927899	8.22E-05	0.001233802	SUCLG2
ENSBTAG00000009569	-0.227638333	6.002527831	8.29E-05	0.001243382	DOCK6
ENSBTAG00000010472	-0.316047674	4.998046185	8.38E-05	0.001254514	TNFAIP8L3
ENSBTAG00000010626	-0.226721919	6.742930228	8.39E-05	0.001255215	SH3GLB2
ENSBTAG00000015656	-0.341864939	4.611448213	8.43E-05	0.001258857	WSCD1
ENSBTAG00000038141	0.191840339	8.655001357	8.44E-05	0.001258857	ADGRG1
ENSBTAG00000040334	-0.207768924	6.646442769	8.46E-05	0.001260985	MEX3D
ENSBTAG00000011413	0.389638221	4.257819643	8.61E-05	0.001281248	CCDC107
ENSBTAG00000018744	-0.23823346	6.406673586	8.65E-05	0.001285831	MGAT5
ENSBTAG00000035544	-0.592392786	3.486037907	8.67E-05	0.001287512	CYP46A1
ENSBTAG00000002871	0.196398002	7.120560238	8.70E-05	0.001290278	COPS6
ENSBTAG00000053620	-1.353023314	0.359328453	8.74E-05	0.001295246	ENSBTAG00000053620
ENSBTAG00000017242	-0.775837029	1.995062263	8.77E-05	0.001298278	FADS6
ENSBTAG00000021177	0.439671076	3.620483504	8.85E-05	0.001308221	ADAMTS14
ENSBTAG00000018912	-0.253755809	5.896654548	8.89E-05	0.001312938	ARHGEF1
ENSBTAG00000022003	-0.403914449	3.852206232	8.99E-05	0.001325152	NSUN6
ENSBTAG00000004189	-0.211307292	6.504297179	9.09E-05	0.00133877	MLXIP
ENSBTAG00000048114	0.370060375	4.37262915	9.11E-05	0.001339307	ENSBTAG00000048114
ENSBTAG00000007071	-0.201113524	6.838764478	9.13E-05	0.001341268	RAI14
ENSBTAG00000014685	0.196853754	6.782633942	9.15E-05	0.001343317	HPRT1
ENSBTAG00000012253	-0.20550806	6.969353457	9.17E-05	0.001343815	AGO1
ENSBTAG00000010375	-0.23346591	5.900580258	9.22E-05	0.001349457	MSL1
ENSBTAG00000019514	0.229948638	6.482887212	9.25E-05	0.001353015	OPA1
ENSBTAG00000048857	-0.983485757	0.994890136	9.27E-05	0.001354277	ENSBTAG00000048857
ENSBTAG00000005183	0.309233824	5.565791848	9.35E-05	0.001364224	MVK
ENSBTAG00000046760	-0.250697809	5.602278143	9.49E-05	0.001381088	BRD1
ENSBTAG00000003456	-0.405490675	4.129554033	9.49E-05	0.001381088	ZNF606
ENSBTAG00000014788	-0.20596304	8.225842971	9.55E-05	0.001387506	AKAP12
ENSBTAG00000019781	-0.185807321	7.547053846	9.58E-05	0.001390885	CLASP1
ENSBTAG00000054238	-0.965388089	1.039631252	9.63E-05	0.001395873	ENSBTAG00000054238
ENSBTAG00000015519	-0.309060236	5.081275489	9.69E-05	0.001402406	GFM2
ENSBTAG00000012219	-0.375897718	4.070175028	9.70E-05	0.001402406	CSPG4
ENSBTAG00000031564	-0.224062245	6.680048552	9.70E-05	0.001402406	GNL3L
ENSBTAG00000052094	-0.501917269	3.200080858	9.74E-05	0.00140608	ENSBTAG00000052094
ENSBTAG00000001179	-0.312112287	5.308790373	9.98E-05	0.001438265	TEP1
ENSBTAG00000013308	-0.210485265	6.552946438	0.000100502	0.001447351	RBMX
ENSBTAG00000016735	-0.471265669	3.824414319	0.000100839	0.001450508	ZBTB48
ENSBTAG00000039815	-0.618641987	2.423968877	0.00010108	0.00145229	ZBTB6
ENSBTAG00000005685	-1.009553187	1.034528616	0.000101829	0.001460351	HSD11B2
ENSBTAG00000050748	-0.397493489	4.2341444	0.000101877	0.001460351	ENSBTAG00000050748
ENSBTAG00000010304	-0.235379611	6.124123718	0.000102172	0.001462895	CHKA
ENSBTAG00000015221	0.237886022	6.097269941	0.000102818	0.001470438	PCCB
ENSBTAG00000021442	0.1814342	7.838156978	0.000103526	0.001478858	CRTAP
ENSBTAG00000021133	-0.520815777	2.901332239	0.00010511	0.001499752	TENM3
ENSBTAG00000037456	-0.2141816	6.313906187	0.0001056	0.00150496	AHDC1
ENSBTAG00000015369	-0.232217828	6.366331165	0.000105718	0.00150496	MLLT11
ENSBTAG00000019093	-0.662702759	2.297015009	0.000106022	0.001507563	AMY2B
ENSBTAG00000030425	-0.213892123	7.076531358	0.000107047	0.001520391	ID3
ENSBTAG00000000202	-0.41092549	3.88279956	0.00010756	0.001524964	SLC25A19
ENSBTAG00000020149	0.309233738	4.736883349	0.000107616	0.001524964	RNASEH2B
ENSBTAG00000000601	-0.928929088	1.31513485	0.000109621	0.0015516	COL11A2
ENSBTAG00000015309	0.748304613	1.890271126	0.000109801	0.001552384	CFAP300
ENSBTAG00000004746	-0.286163143	5.714161766	0.000110361	0.001558525	HELZ
ENSBTAG00000045877	0.239618952	5.833694377	0.000112306	0.001584184	TSC22D3
ENSBTAG00000000813	-0.304233936	4.957791056	0.000112792	0.001589219	HOMER3
ENSBTAG00000053235	-1.320443814	0.26172695	0.000113298	0.001594537	ENSBTAG00000053235
ENSBTAG00000016680	-0.289775236	5.298704137	0.000113448	0.001594839	PPID
ENSBTAG00000021527	-0.208559566	7.559340932	0.000113942	0.001599963	IGF1R
ENSBTAG00000015534	0.371633153	4.251805672	0.000114251	0.001602492	LYPLAL1
ENSBTAG00000002002	-0.1999739	7.330546115	0.000114724	0.00160731	ATAD2
ENSBTAG00000054302	-1.028418893	1.169308887	0.000116109	0.001624867	TCF23
ENSBTAG00000002668	-0.277982907	5.380437645	0.00011813	0.001651287	ZNF711
ENSBTAG00000009111	-0.22736654	6.016741887	0.000118511	0.001653942	LRRN2
ENSBTAG00000044153	-0.310353157	4.95159023	0.000118587	0.001653942	SH3PXD2A
ENSBTAG00000011444	0.384829335	4.187263042	0.000118858	0.001655525	HINT2
ENSBTAG00000000210	-0.207412753	8.754484472	0.000118968	0.001655525	ARHGAP31
ENSBTAG00000006085	0.208875331	7.592246261	0.000120421	0.001673861	DDOST
ENSBTAG00000018297	-0.729035917	2.256377794	0.000121249	0.00168349	PLEKHH1
ENSBTAG00000034776	0.216250962	6.462824735	0.00012201	0.001692155	DDAH1
ENSBTAG00000004293	0.98744733	1.029751045	0.000122554	0.001697793	CLEC12B
ENSBTAG00000016259	-0.520220984	3.38388276	0.000123283	0.001705987	KIAA1958
ENSBTAG00000048062	-0.205097126	6.698330761	0.000123829	0.001711636	KDM6B
ENSBTAG00000010637	0.260810768	5.387585418	0.000124256	0.00171562	ARSG
ENSBTAG00000005929	-0.498624	3.638047462	0.00012537	0.001729068	SPTBN2
ENSBTAG00000020858	0.505209847	3.18675328	0.00012557	0.001729907	UPF3A
ENSBTAG00000044032	-0.202628851	6.98020069	0.000126114	0.001735472	KDM2A
ENSBTAG00000005178	0.418283273	3.818093435	0.000126355	0.001736858	MMAB
ENSBTAG00000017267	0.218701457	6.68405873	0.000127528	0.001751041	COX5A
ENSBTAG00000014455	-0.22732059	7.201834231	0.000127883	0.001753969	PDZD2
ENSBTAG00000039190	-0.496760188	3.303655359	0.000129834	0.001778759	SLC9A5
ENSBTAG00000019961	1.123901306	1.420171448	0.000129992	0.00177895	ATP4B
ENSBTAG00000052912	0.500283796	3.113591974	0.000130176	0.001779505	ENSBTAG00000052912
ENSBTAG00000021474	0.338500906	4.424897974	0.000131397	0.001794212	GSDMD
ENSBTAG00000009535	0.177801897	10.45292126	0.000131557	0.001794425	RPS2
ENSBTAG00000000894	-0.191443127	10.89239809	0.000132055	0.001799234	PGK1
ENSBTAG00000008176	-1.231948021	0.097025554	0.000133592	0.001816032	KCNRG
ENSBTAG00000002177	-0.302832205	4.793412285	0.000133863	0.001816032	PIKFYVE
ENSBTAG00000037581	-0.241388541	6.142647712	0.000133982	0.001816032	MZF1
ENSBTAG00000008289	-0.180917261	7.462351775	0.000134009	0.001816032	ZBTB4
ENSBTAG00000018283	0.228240919	6.27471031	0.000134021	0.001816032	ACAA1
ENSBTAG00000004063	0.430524415	3.634320922	0.000134264	0.001817329	SERPINA5
ENSBTAG00000009006	-0.198777327	6.892987316	0.000134462	0.001818024	PRR14L
ENSBTAG00000014707	1.073907502	1.923609024	0.000138964	0.001876848	ISG15
ENSBTAG00000039929	-1.17046051	0.169052466	0.000139386	0.001880503	RXFP3
ENSBTAG00000019138	-0.218722576	6.386872877	0.000139755	0.001883418	KIF3C
ENSBTAG00000015240	-0.171115378	8.985679275	0.000140119	0.001884452	UBR4
ENSBTAG00000017804	-0.269705558	7.104873131	0.000140136	0.001884452	BNIP3
ENSBTAG00000018413	0.385101175	4.253811616	0.000141873	0.001905742	TENT5B
ENSBTAG00000031295	0.262146617	5.383011719	0.00014328	0.001922557	HSDL2
ENSBTAG00000031503	-0.388051952	6.984209003	0.000144827	0.001941216	NDUFA4L2
ENSBTAG00000013489	0.201341951	6.445576852	0.000145068	0.001942343	CYP27A1
ENSBTAG00000002258	-0.177185637	8.633824589	0.000146387	0.001956099	APOA1
ENSBTAG00000016128	-0.245435839	5.752597137	0.000146411	0.001956099	GGA3
ENSBTAG00000011125	-0.175417704	7.57267363	0.000146658	0.001957287	MYO9B
ENSBTAG00000002052	-0.177108118	8.488656515	0.00014713	0.001961474	PLOD1
ENSBTAG00000044001	-0.352213995	5.849656363	0.000148361	0.001975759	LPP
ENSBTAG00000014679	-0.232343618	5.770721604	0.000148598	0.00197678	DHX57
ENSBTAG00000007835	-0.811236525	2.08312995	0.000149193	0.001982566	GPT
ENSBTAG00000011419	0.169300036	7.977265329	0.000149489	0.001984375	HSPA9
ENSBTAG00000044073	1.318299295	0.423536738	0.00015005	0.001989687	CD248
ENSBTAG00000001781	0.217142509	6.14537751	0.000150283	0.001990641	TOMM40
ENSBTAG00000000704	0.166632933	8.250686603	0.000151041	0.001998554	GUSB
ENSBTAG00000010999	-0.569520511	2.935827042	0.000152908	0.002019318	IL17RD
ENSBTAG00000015050	-0.285446673	4.952636343	0.000153032	0.002019318	HCN2
ENSBTAG00000002834	-0.325689928	4.639864865	0.0001531	0.002019318	CCDC69
ENSBTAG00000019983	-0.234506325	6.497422563	0.000153824	0.002026708	ASXL2
ENSBTAG00000005532	-0.230553001	5.980893879	0.000154041	0.002027422	PEX6
ENSBTAG00000010787	0.483646446	3.467721711	0.000154565	0.002032147	RFC3
ENSBTAG00000000446	-0.220298398	6.121427062	0.000155215	0.002038533	ATP11A
ENSBTAG00000013523	-0.41776442	3.883301652	0.00015606	0.00204746	OSBPL7
ENSBTAG00000010627	-0.180562057	7.249882097	0.00015693	0.002056697	SF3B3
ENSBTAG00000006439	0.311219534	4.687552095	0.000159676	0.002090467	DOCK11
ENSBTAG00000011190	0.157344316	11.02521681	0.000161212	0.002108353	FLNA
ENSBTAG00000013315	0.158667385	9.813347586	0.000164106	0.002143595	ATP5F1B
ENSBTAG00000019745	-0.285312022	4.916239123	0.000164253	0.002143595	LMF1
ENSBTAG00000003092	0.220271579	6.140211038	0.000164559	0.002145332	ANAPC5
ENSBTAG00000040384	0.289081498	5.131114859	0.00016501	0.002148941	POLR2M
ENSBTAG00000007214	-0.222163372	6.043696804	0.000166307	0.002162248	ELL2
ENSBTAG00000009150	0.16125247	8.959996669	0.00016638	0.002162248	SPON1
ENSBTAG00000037383	-0.205666448	7.480711963	0.000167191	0.002170508	AKAP13
ENSBTAG00000011793	0.231968766	5.923762067	0.00016798	0.002178465	FDX1
ENSBTAG00000019419	0.227596424	6.063068681	0.000170297	0.002206196	NDUFS7
ENSBTAG00000005958	-0.455900357	3.424209895	0.00017122	0.002215836	PTK2B
ENSBTAG00000018065	0.230057014	5.973526397	0.000172726	0.002233003	YARS1
ENSBTAG00000024688	-0.277653898	6.254115828	0.000173461	0.002238319	PHIP
ENSBTAG00000021253	-0.414423581	3.647369537	0.000173499	0.002238319	PRDM15
ENSBTAG00000019136	0.185289557	7.368935857	0.000173853	0.002240556	STUB1
ENSBTAG00000015670	-0.345751882	4.250493657	0.000174719	0.002249374	PAK3
ENSBTAG00000001036	0.191936507	6.864154257	0.000175691	0.002259541	HIBADH
ENSBTAG00000021189	-0.858124795	1.184428156	0.000175899	0.002259861	ARHGAP36
ENSBTAG00000000483	-0.254353012	5.386564098	0.000177352	0.002276174	HYAL1
ENSBTAG00000003675	-0.221243168	6.063864083	0.000177803	0.002279601	ADGRL1
ENSBTAG00000018834	-0.190849676	7.060341829	0.000178269	0.002281775	PPP1R37
ENSBTAG00000016732	0.862265248	1.515541941	0.000178341	0.002281775	DNAI2
ENSBTAG00000001156	0.322891731	4.464285959	0.000178752	0.002284673	ST3GAL1
ENSBTAG00000010551	0.32903384	5.089847393	0.000179275	0.002288985	ATP1A2
ENSBTAG00000020726	-0.221674966	5.948806961	0.000180457	0.002301706	ARHGEF7
ENSBTAG00000018548	0.205091149	6.45859804	0.000181089	0.002307397	INTS7
ENSBTAG00000002078	-0.193419401	6.647962008	0.000182175	0.002318846	KDM4A
ENSBTAG00000008543	0.307997548	4.747041334	0.000183562	0.002334101	GTF2H5
ENSBTAG00000007681	0.33540756	4.294559494	0.000183882	0.002335638	DHFR
ENSBTAG00000011862	0.457867009	3.431048761	0.00018406	0.002335638	PCDH20
ENSBTAG00000054448	-0.2912187	5.151250713	0.000186511	0.002364316	RIMS2
ENSBTAG00000015885	-0.418484214	3.736587827	0.00018781	0.002376579	PPFIA4
ENSBTAG00000009786	-0.446919404	3.510795107	0.000187862	0.002376579	SCIN
ENSBTAG00000016411	-0.434747966	3.635503357	0.000191003	0.002413853	RNF122
ENSBTAG00000002697	-0.196922396	6.864297888	0.000191414	0.00241389	KCTD10
ENSBTAG00000012338	0.539639147	2.994567315	0.000191502	0.00241389	FAH
ENSBTAG00000019839	-0.172629847	8.569612072	0.000191591	0.00241389	LTBP1
ENSBTAG00000009475	-0.21781489	7.896958756	0.00019257	0.002422434	PLXDC2
ENSBTAG00000016963	-0.730311845	1.676859959	0.00019266	0.002422434	ADAMTS6
ENSBTAG00000009014	0.266183265	5.682650153	0.000197398	0.002479492	UPK1B
ENSBTAG00000009085	-0.204955622	6.555721789	0.000198861	0.002494772	SLC35A5
ENSBTAG00000019916	-0.237327342	5.904830425	0.000199018	0.002494772	CLMN
ENSBTAG00000013046	0.238627409	5.665518886	0.000200167	0.002506641	MPP1
ENSBTAG00000017710	0.19503627	6.812565949	0.000201244	0.002517581	ECHS1
ENSBTAG00000049557	-0.812928683	1.407351761	0.000205296	0.00256178	ENSBTAG00000049557
ENSBTAG00000017845	0.210383777	6.274977501	0.000205471	0.00256178	BAG1
ENSBTAG00000015074	-0.371904256	4.300172777	0.000205604	0.00256178	PTGDS
ENSBTAG00000016818	0.241339144	5.531391506	0.000205604	0.00256178	ZCCHC17
ENSBTAG00000031849	-0.353036248	4.223339175	0.000208596	0.00259635	TMEM119
ENSBTAG00000053909	-0.352438163	4.190967359	0.000208798	0.00259635	NAT9
ENSBTAG00000013392	-0.253386649	5.289292689	0.000210348	0.002612998	PLD2
ENSBTAG00000021948	-0.305387025	4.683693209	0.000211064	0.002619264	ZMYM6
ENSBTAG00000017200	1.005563013	1.137574758	0.000213924	0.002652104	RHOJ
ENSBTAG00000022632	0.267566619	5.284170524	0.00021484	0.002660794	TCTA
ENSBTAG00000011743	-0.576290237	2.512454441	0.000216416	0.002677636	TLL2
ENSBTAG00000015053	0.244034547	5.710024103	0.00021786	0.002691736	CFL2
ENSBTAG00000005769	-0.471775564	3.295559105	0.00021799	0.002691736	NPHP3
ENSBTAG00000004542	-0.193403491	6.963305529	0.000218221	0.0026919	FAM78A
ENSBTAG00000001038	0.22198291	6.688106345	0.000218607	0.002693978	SNRPB
ENSBTAG00000009495	0.156231679	10.14033099	0.000219536	0.002702735	BCAM
ENSBTAG00000012808	-0.728719399	1.783984315	0.000220355	0.002710131	MASP2
ENSBTAG00000000077	0.222472222	6.081134628	0.000220831	0.002711506	ADSL
ENSBTAG00000018031	-0.587357934	2.439749819	0.000220905	0.002711506	PODXL2
ENSBTAG00000005497	-0.314778759	4.886777727	0.000222465	0.002727947	RPRD1A
ENSBTAG00000002890	-0.185755222	6.946614943	0.000222908	0.002730677	RBM10
ENSBTAG00000010082	0.179564124	7.5140927	0.000225218	0.002756251	COL15A1
ENSBTAG00000016057	0.171456518	8.333472954	0.000226767	0.002772469	CSRP1
ENSBTAG00000005668	0.158902046	9.323622551	0.000229229	0.002797373	SLC39A8
ENSBTAG00000000836	0.247958406	7.952089402	0.000229256	0.002797373	KRT8
ENSBTAG00000015235	-0.983886822	1.240381865	0.000230054	0.002804349	HMCN1
ENSBTAG00000005069	0.297484775	5.848980801	0.000232051	0.002825916	TM7SF2
ENSBTAG00000038322	-0.359524308	4.338490083	0.000233344	0.00283886	ENSBTAG00000038322
ENSBTAG00000046561	-0.375417076	4.23958714	0.00023444	0.002849396	LCORL
ENSBTAG00000001888	-0.26132034	5.798019323	0.000234703	0.002849803	MED13L
ENSBTAG00000021251	0.477171167	3.584073945	0.000235118	0.002852038	RIPK4
ENSBTAG00000007485	-0.709680277	1.950521612	0.000236117	0.00286136	GRHL1
ENSBTAG00000021143	-0.207285179	6.630291777	0.000236985	0.002869068	DNMT3A
ENSBTAG00000012623	-0.198056105	6.316196026	0.000238061	0.002879286	NDP
ENSBTAG00000013116	-0.237400857	5.587268561	0.000238809	0.002885507	PLCB4
ENSBTAG00000005009	0.190834853	7.043456863	0.00024003	0.002897181	PRELID1
ENSBTAG00000005211	0.160310769	9.482309697	0.000240243	0.002897181	RPL4
ENSBTAG00000022886	-0.877411981	1.334828392	0.000247546	0.00298235	RYR2
ENSBTAG00000019652	0.740197502	2.023065428	0.000249747	0.003005947	STK26
ENSBTAG00000001854	0.196895726	6.914382605	0.000251041	0.003018579	CIAPIN1
ENSBTAG00000004879	-0.340585129	4.320181091	0.000253592	0.003046299	FOXO4
ENSBTAG00000014043	-0.266519234	5.190105346	0.000254168	0.003050265	ERCC5
ENSBTAG00000003148	-0.190596179	6.595698849	0.000254617	0.003052696	MCM3AP
ENSBTAG00000006960	-0.256449966	5.447791154	0.000255654	0.003062158	DHX16
ENSBTAG00000020219	-1.006234565	0.850509308	0.000256229	0.003065423	MSS51
ENSBTAG00000051486	0.195914362	7.197540636	0.000256421	0.003065423	UFM1
ENSBTAG00000021227	0.215223344	6.628180097	0.000257446	0.003071492	ATP5PD
ENSBTAG00000011837	0.203592905	6.471226853	0.000257546	0.003071492	GET3
ENSBTAG00000003358	0.204947409	6.41497824	0.000257673	0.003071492	MCFD2
ENSBTAG00000020852	0.449835044	3.400744322	0.000259859	0.003094571	SLC16A11
ENSBTAG00000054228	0.286195325	5.505815723	0.000261415	0.003109958	ENSBTAG00000054228
ENSBTAG00000054678	0.199396381	7.424181566	0.000261653	0.003109958	ENSBTAG00000054678
ENSBTAG00000049252	1.083646046	0.475911134	0.000263335	0.003126944	ENSBTAG00000049252
ENSBTAG00000016133	0.323100553	4.813048479	0.00026425	0.003134801	MRPS7
ENSBTAG00000020745	-0.600333226	2.455157565	0.000270578	0.003206505	HIVEP3
ENSBTAG00000022069	-0.194547478	6.695462334	0.000270829	0.003206505	ATXN2
ENSBTAG00000015186	0.260544396	5.172478195	0.000271071	0.003206505	ILVBL
ENSBTAG00000011420	-0.539868488	2.745080626	0.000271409	0.00320696	CA9
ENSBTAG00000000417	0.225081367	6.005605581	0.000271627	0.00320696	MRPL12
ENSBTAG00000010303	0.660350405	2.305225599	0.000272995	0.003220038	ICAM1
ENSBTAG00000006630	-1.197314468	0.160801705	0.000273338	0.003221024	SLC12A3
ENSBTAG00000027924	0.176869783	7.32341895	0.000273715	0.003222393	SNX18
ENSBTAG00000014021	-0.433801039	4.396253555	0.000278347	0.003269485	UBN2
ENSBTAG00000007976	0.226042538	5.759323366	0.000278469	0.003269485	FAM3C
ENSBTAG00000025181	-0.240705928	5.571931694	0.000278507	0.003269485	CCDC85C
ENSBTAG00000040331	-1.13267478	0.202438316	0.000281415	0.003300499	ENSBTAG00000040331
ENSBTAG00000013530	-0.222781391	6.545156918	0.000281741	0.003301189	DDAH2
ENSBTAG00000051419	0.874838098	1.522530427	0.000284744	0.003333225	ENSBTAG00000051419
ENSBTAG00000015678	-0.547199963	2.778810463	0.000285565	0.003337737	NEMP2
ENSBTAG00000046358	0.14885726	9.6660807	0.000285668	0.003337737	PABPC1
ENSBTAG00000004154	-0.265624685	5.227414323	0.000286082	0.003339417	SKIL
ENSBTAG00000031185	0.268186724	5.027087315	0.000286832	0.003345028	ATRAID
ENSBTAG00000009679	-0.19865206	6.882084025	0.000287521	0.003348099	PLEKHG1
ENSBTAG00000038896	0.167419621	8.302069644	0.000287636	0.003348099	RPS26
ENSBTAG00000015166	-0.530357788	2.691759646	0.000289804	0.00337016	PNLDC1
ENSBTAG00000010729	-0.33854623	4.253653195	0.000290364	0.003373503	KRI1
ENSBTAG00000005733	-0.228700624	6.050444884	0.000292659	0.003396986	CHD6
ENSBTAG00000011041	-0.201984151	6.304287158	0.000294252	0.003412271	ZFYVE1
ENSBTAG00000011928	-0.498201697	4.413326406	0.000295526	0.003422581	ZBTB20
ENSBTAG00000010217	-0.270110548	5.661719627	0.000295693	0.003422581	ZNF318
ENSBTAG00000013725	-0.231858395	5.706333742	0.000296337	0.003426832	RBSN
ENSBTAG00000019993	-1.007221044	0.494530667	0.00029689	0.003430024	APLN
ENSBTAG00000013813	-0.426686597	3.38988601	0.000297759	0.003436859	KLHL17
ENSBTAG00000013108	-0.250884315	6.812564127	0.000298964	0.003446369	HK2
ENSBTAG00000016302	-0.414881759	3.559392136	0.00029914	0.003446369	SLC25A27
ENSBTAG00000008528	0.198499613	7.371824861	0.000299576	0.003448187	SLC25A1
ENSBTAG00000011908	0.453689948	3.182979815	0.000301842	0.003471041	CPQ
ENSBTAG00000017263	-0.311781824	5.416876099	0.00030318	0.003482213	MXI1
ENSBTAG00000001521	0.23410153	5.867845599	0.000303382	0.003482213	UQCRB
ENSBTAG00000000139	-0.25160645	5.237338949	0.000303657	0.003482213	KMT5A
ENSBTAG00000005903	-0.202505173	6.748743509	0.000306885	0.003515982	LRP5
ENSBTAG00000046037	0.190521596	6.6300821	0.000307717	0.003520745	SLC25A5
ENSBTAG00000051298	-0.189601995	9.012310321	0.00030787	0.003520745	PVR
ENSBTAG00000012351	-0.378282164	4.280210948	0.000312673	0.003572379	ARNT2
ENSBTAG00000006244	0.245966042	5.677715977	0.000315036	0.003596054	WDR83OS
ENSBTAG00000034693	-0.190721801	6.460608732	0.000315364	0.003596481	SYT1
ENSBTAG00000052577	-1.21119109	0.025744777	0.000319154	0.003636359	ENSBTAG00000052577
ENSBTAG00000010577	0.186375616	6.637250834	0.000319802	0.003639839	PAICS
ENSBTAG00000019591	-0.847124325	1.131234249	0.000320047	0.003639839	DCX
ENSBTAG00000013215	0.436340366	3.475429712	0.000320606	0.003642845	MREG
ENSBTAG00000000342	-0.167845339	7.891119491	0.000322615	0.003662313	PLOD3
ENSBTAG00000002627	-0.247131929	5.471204993	0.000324264	0.003674975	ZRANB2
ENSBTAG00000006175	-0.162375029	7.85616727	0.000324607	0.003674975	KDM5B
ENSBTAG00000000706	-0.365616522	4.092450782	0.00032462	0.003674975	ADAMTS1
ENSBTAG00000004556	-0.240387987	7.337834413	0.000326723	0.003695399	SLC2A3
ENSBTAG00000047828	-0.711624196	1.705340237	0.00032741	0.003699788	SHLD3
ENSBTAG00000000497	0.19408604	6.986661428	0.000328326	0.003706765	AKR1A1
ENSBTAG00000019733	0.425704967	3.632940757	0.000331971	0.003744499	ADGRL4
ENSBTAG00000009694	-0.422203115	3.607530802	0.000332863	0.003751144	PUS10
ENSBTAG00000000517	0.315955014	4.597891473	0.000334981	0.003771583	ANKRD29
ENSBTAG00000015655	-0.206664216	6.389900693	0.000339945	0.003823999	APBB1
ENSBTAG00000007271	0.355504976	4.108372366	0.000340886	0.003831099	TCTN2
ENSBTAG00000050527	-0.737683122	1.965785522	0.000342176	0.00384211	ENSBTAG00000050527
ENSBTAG00000032140	-0.774205831	1.410871384	0.000342901	0.003846768	SBK1
ENSBTAG00000005999	-0.28839853	5.069724069	0.000345803	0.00387581	FSD1
ENSBTAG00000001288	-0.820985451	1.46738005	0.00035148	0.003933219	MAOB
ENSBTAG00000015716	-0.336710881	5.223576879	0.00035156	0.003933219	ERO1A
ENSBTAG00000021813	0.158134683	8.756057062	0.000352752	0.003942992	AMACR
ENSBTAG00000039782	-0.397796074	3.763617965	0.000354999	0.003963111	ZNF12
ENSBTAG00000004428	0.204080362	7.200570041	0.000355362	0.003963111	H2AZ1
ENSBTAG00000052473	0.262532087	5.247001316	0.000355512	0.003963111	ENSBTAG00000052473
ENSBTAG00000012126	-0.459951588	3.246904829	0.000357217	0.00397854	PNPLA7
ENSBTAG00000007031	0.403427801	3.542035574	0.000358476	0.003988971	OXSM
ENSBTAG00000016911	-0.257081486	5.327320188	0.000360269	0.004005325	ARHGAP23
ENSBTAG00000001694	-0.151408524	9.337901542	0.000361308	0.004013277	TYRO3
ENSBTAG00000017694	-0.264874792	5.468630669	0.000365991	0.004061653	TRPS1
ENSBTAG00000017564	-0.175982482	7.026383565	0.000366353	0.004062027	CGN
ENSBTAG00000015474	-0.20599458	6.083466041	0.000366946	0.004064962	SRSF11
ENSBTAG00000014334	-0.17499529	7.362651141	0.000369186	0.004086121	ZFYVE26
ENSBTAG00000021997	-0.215267815	6.092803791	0.000369998	0.004091446	ITSN1
ENSBTAG00000007300	0.202251933	6.326795898	0.000370498	0.00409333	FHL3
ENSBTAG00000000604	0.237714669	5.651548945	0.000371602	0.004097108	GPNMB
ENSBTAG00000014779	-0.177214062	7.468597742	0.000371794	0.004097108	NISCH
ENSBTAG00000008695	-0.18821929	6.452203265	0.000371833	0.004097108	TCF3
ENSBTAG00000044112	0.309664378	4.490791933	0.000373172	0.00410704	MSRB2
ENSBTAG00000034393	0.362544951	3.895028359	0.000373646	0.00410704	FAM149A
ENSBTAG00000005987	-0.211245031	5.9351677	0.000373729	0.00410704	WDR33
ENSBTAG00000034113	-0.330786718	4.349702176	0.000374913	0.004116401	GALNT10
ENSBTAG00000006526	0.224309817	6.425345666	0.000376884	0.004134378	BCL2L1
ENSBTAG00000002950	0.253211588	5.386726101	0.000378712	0.004150754	TMEM132D
ENSBTAG00000044046	-1.010251771	0.54473925	0.000382905	0.004192997	SGCD
ENSBTAG00000049483	0.346302379	4.250048728	0.000384343	0.004205028	COPRS
ENSBTAG00000053484	-0.247714561	5.281729326	0.000386983	0.004226826	CTDP1
ENSBTAG00000026286	0.269400587	5.154554635	0.000387018	0.004226826	GTF2IRD2
ENSBTAG00000018281	0.263082099	5.345083543	0.00038753	0.004227872	GPX7
ENSBTAG00000017369	0.196145498	6.312611192	0.000387797	0.004227872	MAMDC2
ENSBTAG00000021841	-0.219808787	6.15695338	0.000388388	0.004230594	CHD7
ENSBTAG00000006531	-0.21313146	6.380357782	0.000390192	0.004246509	DIP2C
ENSBTAG00000015434	0.173200062	7.852896878	0.00039111	0.004252759	DSTN
ENSBTAG00000000993	-0.428137531	3.440188542	0.000392383	0.004262861	N4BP2L1
ENSBTAG00000005426	0.183899392	7.019804871	0.000396102	0.004299494	PSMC1
ENSBTAG00000002920	-0.215448649	6.088661036	0.00039774	0.004313491	KAT6B
ENSBTAG00000003929	-0.186836626	6.81182895	0.000399604	0.00432992	PHF10
ENSBTAG00000039727	-0.496378945	3.012106085	0.000401359	0.004345129	DCLK3
ENSBTAG00000027795	0.236652435	5.706544385	0.000402211	0.004350557	GFM1
ENSBTAG00000021651	0.194954297	6.7306813	0.000402711	0.004352157	UQCRC2
ENSBTAG00000018951	-0.168199917	7.400805532	0.000405352	0.004376878	TBC1D9
ENSBTAG00000009844	0.177611802	7.920713525	0.000410354	0.004427032	CCN1
ENSBTAG00000006326	-0.542327203	2.811655636	0.00041157	0.004436285	ALDH1L2
ENSBTAG00000005842	-0.393529989	3.685749483	0.000414651	0.004464504	ABCC10
ENSBTAG00000018936	0.184540786	7.782988959	0.000414909	0.004464504	LSS
ENSBTAG00000014440	0.230196375	5.681772828	0.000416051	0.004472912	PSMA4
ENSBTAG00000052127	-1.218502046	0.27222324	0.000416707	0.004476078	ENSBTAG00000052127
ENSBTAG00000051794	-0.495322416	3.048449376	0.000419796	0.004505352	ENSBTAG00000051794
ENSBTAG00000011027	0.208467115	6.194212904	0.000421351	0.004518126	PTGR1
ENSBTAG00000013774	-0.720744376	1.740904785	0.000421741	0.004518394	CCDC9B
ENSBTAG00000013208	0.209038604	6.376592271	0.000422909	0.004526986	SLC25A4
ENSBTAG00000009190	0.664012578	2.306281012	0.000423568	0.004530131	SLC2A4
ENSBTAG00000017490	-0.447703667	3.746239875	0.000424196	0.004532936	PLD1
ENSBTAG00000018454	-0.327036077	4.41612899	0.000424572	0.004533035	UFSP2
ENSBTAG00000053098	-0.258997995	5.182686518	0.000425382	0.004534576	ENSBTAG00000053098
ENSBTAG00000043990	-0.474608296	2.970794542	0.000425448	0.004534576	KHDRBS2
ENSBTAG00000013916	-0.201393139	7.915158306	0.000429404	0.004572804	HERC2
ENSBTAG00000002854	-0.359395385	4.347150223	0.000433317	0.004607419	TMEM63A
ENSBTAG00000004813	-0.454140531	3.328990419	0.000433399	0.004607419	SUSD1
ENSBTAG00000051491	-0.629544451	2.428920416	0.000436651	0.004638016	ENSBTAG00000051491
ENSBTAG00000004632	0.196976002	6.303973764	0.000440626	0.004674824	ASPSCR1
ENSBTAG00000051821	-0.745920557	1.464880047	0.000440872	0.004674824	ENSBTAG00000051821
ENSBTAG00000003021	-0.231391362	5.819865265	0.000442645	0.004689618	SP1
ENSBTAG00000008525	-0.298585227	4.824527605	0.000443635	0.004696087	LRIG2
ENSBTAG00000009219	1.172151493	0.020373598	0.000444388	0.004700039	CADM2
ENSBTAG00000017785	-1.139569554	0.26953405	0.000446127	0.00471394	FRMPD4
ENSBTAG00000016733	-0.203470292	6.083903036	0.000446464	0.00471394	NOL9
ENSBTAG00000009655	-0.178653294	7.183512611	0.00044741	0.004719912	TNS3
ENSBTAG00000004015	-0.202301662	6.283075539	0.000449816	0.004741206	KAT6A
ENSBTAG00000052481	-0.16539759	7.539140524	0.000450194	0.004741206	IRGQ
ENSBTAG00000001821	-0.184081793	8.35985635	0.000451021	0.004745878	PRRC2C
ENSBTAG00000016043	-0.905551603	1.085323034	0.000453279	0.00476559	GNB3
ENSBTAG00000048810	-0.316904117	4.592556387	0.000458974	0.004819435	ZEB2
ENSBTAG00000000911	-0.182042525	7.207645446	0.000459179	0.004819435	UBE2H
ENSBTAG00000009207	-0.202261462	6.597671885	0.000461054	0.004835015	KMT2E
ENSBTAG00000009928	0.321808175	4.370849424	0.000467487	0.004898331	MLST8
ENSBTAG00000013363	0.157551496	8.757634013	0.000468108	0.004900686	CAP1
ENSBTAG00000015792	-0.628689509	2.072884876	0.000468763	0.0049034	CFAP54
ENSBTAG00000054061	-0.212104267	5.905955289	0.000475386	0.004968491	RUSC1
ENSBTAG00000008008	0.701034494	2.060948361	0.000482345	0.005036968	TLR2
ENSBTAG00000013961	-0.26438056	5.078095287	0.000482757	0.005037022	MYSM1
ENSBTAG00000009547	0.193986165	6.304021578	0.000484319	0.005049069	ZDHHC4
ENSBTAG00000020050	-0.194388603	6.576164829	0.000488957	0.005093128	MLEC
ENSBTAG00000010065	-0.288960173	5.412930792	0.000490292	0.005102742	TRPC5
ENSBTAG00000026913	-0.150608427	9.383921219	0.000493059	0.00512723	HHIPL1
ENSBTAG00000045857	0.283234024	5.17163924	0.000498759	0.005178971	MCRIP2
ENSBTAG00000015013	-0.2415883	5.893902962	0.000498871	0.005178971	C2CD2L
ENSBTAG00000012193	-0.272821238	5.320584062	0.000501777	0.005204781	TTC28
ENSBTAG00000017232	-0.213934644	6.48736274	0.000502772	0.005210738	KIF13B
ENSBTAG00000010888	-0.695382046	1.780409396	0.00050663	0.005244686	VSIR
ENSBTAG00000002333	0.256318028	5.227833323	0.000506895	0.005244686	HOPX
ENSBTAG00000006784	-0.813687285	1.191557887	0.000508368	0.005251725	PLA2G4B
ENSBTAG00000010696	-0.203758297	6.020396551	0.000508486	0.005251725	DVL1
ENSBTAG00000003097	-0.198375038	8.35175716	0.000509199	0.005251725	DENND4C
ENSBTAG00000031402	-0.189442464	6.514581433	0.000509271	0.005251725	ASXL1
ENSBTAG00000005145	-0.22347263	7.030194835	0.000512325	0.005278824	PEAK1
ENSBTAG00000031335	0.228780344	5.535951503	0.000515755	0.005309751	BABAM2
ENSBTAG00000049946	-1.105432214	0.422210514	0.000516229	0.005310212	ENSBTAG00000049946
ENSBTAG00000016534	-0.930763546	1.066559965	0.000520385	0.005348521	BCL11A
ENSBTAG00000018671	-0.495726001	2.71761109	0.000521576	0.00535259	DCUN1D2
ENSBTAG00000010134	0.19611193	6.064913176	0.000521645	0.00535259	OSTM1
ENSBTAG00000015713	-0.265545491	5.115357745	0.000531272	0.005446853	TLK2
ENSBTAG00000033137	-0.254824262	5.731478457	0.00053199	0.005449706	PSD3
ENSBTAG00000039731	-0.171626424	7.327603347	0.00053415	0.005467312	RND3
ENSBTAG00000011885	0.156622711	7.848416584	0.000538141	0.005498957	NNT
ENSBTAG00000004685	-0.717660948	1.927747803	0.000538165	0.005498957	SRGAP3
ENSBTAG00000046286	0.452350392	3.243539136	0.000538574	0.005498957	CCNB3
ENSBTAG00000017380	-0.19060158	6.315910354	0.000543069	0.005540293	MYO18A
ENSBTAG00000009658	0.562441257	2.753985309	0.000543721	0.005542378	PLEK
ENSBTAG00000025385	0.392793216	3.734159023	0.000544211	0.005542804	ENSBTAG00000025385
ENSBTAG00000000874	0.150604299	8.28373088	0.000546892	0.00556554	CAST
ENSBTAG00000021798	-0.196615276	6.192275351	0.000555049	0.005643911	ERBB2
ENSBTAG00000033429	0.585502459	2.313511312	0.000556552	0.005650662	FAM229B
ENSBTAG00000022242	0.173869414	7.13836308	0.000556626	0.005650662	DPP3
ENSBTAG00000011212	0.195997664	6.680988979	0.000560932	0.00568972	EIF3K
ENSBTAG00000026309	-0.249257762	5.158222431	0.000563655	0.005712655	ZHX2
ENSBTAG00000013380	-0.289792555	4.86026994	0.000565465	0.005726319	CEP192
ENSBTAG00000017584	-0.173828592	6.804794043	0.000568757	0.005752371	PLCG1
ENSBTAG00000011313	-0.306938222	4.593254421	0.000568967	0.005752371	CASP8AP2
ENSBTAG00000017281	-0.223186695	5.774541102	0.000574644	0.005799702	OPLAH
ENSBTAG00000000711	-0.166220555	7.673381439	0.000574689	0.005799702	NDRG1
ENSBTAG00000012244	0.150087458	9.713896204	0.000575053	0.005799702	TUBA1B
ENSBTAG00000003447	-0.679508549	1.991606891	0.000578897	0.005832744	ENSBTAG00000003447
ENSBTAG00000022920	0.160115847	7.849252562	0.000579271	0.005832744	RNF128
ENSBTAG00000025788	0.290828826	4.700352071	0.000580606	0.00584143	MPV17L2
ENSBTAG00000011145	0.191086173	7.155553159	0.00058453	0.005876135	NDUFA4
ENSBTAG00000014438	-0.323943032	4.300920355	0.000591282	0.005939193	SS18L1
ENSBTAG00000032021	-0.153573895	8.338848319	0.000594734	0.005969027	RALB
ENSBTAG00000008771	-0.269584656	5.221996708	0.000595857	0.005969946	MYEF2
ENSBTAG00000003001	0.190929476	6.306670862	0.000596104	0.005969946	LAMTOR1
ENSBTAG00000039283	-1.232153581	0.262269033	0.000596272	0.005969946	ENSBTAG00000039283
ENSBTAG00000014420	-1.137455535	0.131802796	0.00060483	0.006046539	AGER
ENSBTAG00000050644	-0.420264372	3.293104747	0.000604898	0.006046539	ENSBTAG00000050644
ENSBTAG00000008409	-0.203570083	5.979716272	0.000605893	0.006051601	MYC
ENSBTAG00000001030	-0.154201086	7.928887717	0.000611506	0.006102741	MTMR3
ENSBTAG00000003222	0.219708014	5.613212174	0.000613565	0.006118355	ASNS
ENSBTAG00000000428	0.238681797	6.010566634	0.000614168	0.006119441	BAK1
ENSBTAG00000014501	0.176119292	6.781349178	0.00061643	0.006137051	FERMT2
ENSBTAG00000020931	0.206105156	5.787163827	0.000616957	0.006137362	CHN2
ENSBTAG00000014771	-0.564493525	2.996034364	0.000623124	0.006193731	RBMX2
ENSBTAG00000004145	-0.276242854	4.919277169	0.000625872	0.006213715	ANO4
ENSBTAG00000001419	0.219612771	5.737453265	0.000626138	0.006213715	MRPL4
ENSBTAG00000014782	-0.72859119	2.082255571	0.000627926	0.006226474	STAB1
ENSBTAG00000002554	-0.178862353	7.358044958	0.00062894	0.006231533	TCAF1
ENSBTAG00000002858	-0.44631239	2.967855022	0.000630434	0.006241343	ACBD7
ENSBTAG00000013929	0.341673763	4.279637731	0.000631076	0.006242713	RRAD
ENSBTAG00000010830	-0.154794972	12.05176064	0.000634269	0.006269287	LRP1
ENSBTAG00000008981	-0.800564025	1.082763611	0.000638285	0.00630343	USP49
ENSBTAG00000014601	0.192990564	6.954300683	0.000638741	0.00630343	SGCB
ENSBTAG00000052906	-0.289935103	4.897732937	0.000646039	0.006370379	ZNF8
ENSBTAG00000017932	-0.508539818	2.670516791	0.000648877	0.006393274	CCDC84
ENSBTAG00000019253	0.181983531	6.396029484	0.000653162	0.006430376	RPL36A
ENSBTAG00000049766	0.267010195	4.757101535	0.000653898	0.006432511	DUSP28
ENSBTAG00000014224	-0.407576062	3.472326849	0.000662528	0.006512228	IGSF9B
ENSBTAG00000013065	0.25345924	5.217536278	0.00066992	0.00657967	HFE
ENSBTAG00000024542	0.188051305	6.763158936	0.00067179	0.006592803	PIGC
ENSBTAG00000054870	0.914070979	0.769668896	0.000674175	0.006606231	ENSBTAG00000054870
ENSBTAG00000012353	-0.349618689	3.93836695	0.000674225	0.006606231	ZNF34
ENSBTAG00000018437	-0.23756593	5.411623819	0.000677268	0.006630805	SMC5
ENSBTAG00000017128	-0.181754841	6.469890435	0.000680116	0.006653426	NUP153
ENSBTAG00000018578	-0.22521756	5.648668307	0.000689148	0.006736463	LOXL3
ENSBTAG00000054948	-0.650668606	1.872874556	0.000689799	0.006737511	ENSBTAG00000054948
ENSBTAG00000018225	-0.189932836	6.427580497	0.000692897	0.00676243	SIPA1L3
ENSBTAG00000014762	-0.59801575	2.390913746	0.000696969	0.006796818	ISG20
ENSBTAG00000050438	0.854915348	0.887015954	0.000698725	0.006808581	ENSBTAG00000050438
ENSBTAG00000016328	-0.15950526	7.776603023	0.000703915	0.006853757	SFPQ
ENSBTAG00000009667	-0.227240971	5.565233697	0.000704468	0.006853757	SLC25A46
ENSBTAG00000017872	-0.37820165	3.621213402	0.00070947	0.006897004	ZNF304
ENSBTAG00000003111	-0.284276522	5.990789863	0.000710066	0.006897383	ATM
ENSBTAG00000003669	-0.259476835	4.920042789	0.000710993	0.00690098	BNC2
ENSBTAG00000053910	-0.674078029	1.925921175	0.000714236	0.006919944	C17orf58
ENSBTAG00000012944	-0.284967203	5.013970578	0.00071447	0.006919944	USP35
ENSBTAG00000012788	0.159937644	8.030683977	0.000714623	0.006919944	COX6A1
ENSBTAG00000004203	0.236801526	5.264466256	0.000716033	0.006928175	VPS33A
ENSBTAG00000017879	0.866518437	0.917089018	0.000716985	0.006931971	C9H6orf163
ENSBTAG00000005471	-1.191203561	0.420974735	0.000720131	0.006956963	RHCG
ENSBTAG00000000979	0.212873413	5.780417741	0.000723863	0.006985185	SMIM19
ENSBTAG00000008731	0.172021159	6.989376447	0.00072436	0.006985185	PRDX3
ENSBTAG00000003300	0.14694973	11.60671525	0.000724745	0.006985185	MFGE8
ENSBTAG00000030503	0.266729721	5.070497676	0.000730385	0.007034076	H2AJ
ENSBTAG00000011396	-0.171921492	7.164262164	0.00073517	0.007072919	HNRNPC
ENSBTAG00000019494	0.156188658	8.07770119	0.000735684	0.007072919	RPL10A
ENSBTAG00000019044	-0.440123461	3.143116272	0.000736402	0.007072919	BAIAP2
ENSBTAG00000005638	-0.65893175	1.923196325	0.000736703	0.007072919	CABYR
ENSBTAG00000015969	-0.281598133	4.649782091	0.000737285	0.007073026	STK40
ENSBTAG00000001740	0.301234771	4.565829499	0.000738229	0.007073627	HAPLN3
ENSBTAG00000010809	-0.310991946	4.439326816	0.000738726	0.007073627	HID1
ENSBTAG00000007963	-0.160227673	8.059427012	0.000739061	0.007073627	KIDINS220
ENSBTAG00000031134	0.167983855	7.885997811	0.000741474	0.007090184	YWHAH
ENSBTAG00000014454	-0.197794684	6.246436747	0.000741936	0.007090184	PRR12
ENSBTAG00000024000	-0.247445052	5.130396129	0.000743687	0.007101438	ATOH8
ENSBTAG00000023659	0.58035129	2.544412002	0.000745623	0.007110936	MT2A
ENSBTAG00000020850	0.206168231	5.851285087	0.000746351	0.007110936	MUL1
ENSBTAG00000019013	-0.194653276	6.393339298	0.000746404	0.007110936	HECTD3
ENSBTAG00000018966	-0.192792081	6.733565763	0.000749377	0.007129592	PLCE1
ENSBTAG00000013524	-0.184361008	6.32418495	0.000749514	0.007129592	CMIP
ENSBTAG00000002086	-0.21090239	6.581286676	0.000756346	0.007189058	PRPF4B
ENSBTAG00000020311	-0.203425125	5.926663085	0.000762416	0.007241198	USP20
ENSBTAG00000018105	-0.586656976	2.453101691	0.000768032	0.007287908	ACVR2B
ENSBTAG00000014373	0.272792344	4.68799039	0.000768511	0.007287908	CETN3
ENSBTAG00000033077	-0.26514968	5.465922747	0.0007713	0.00730422	NUFIP2
ENSBTAG00000008114	0.15447238	7.952017656	0.000771411	0.00730422	CD99
ENSBTAG00000018258	-0.174339563	7.77683714	0.000773495	0.007318363	SRSF2
ENSBTAG00000015086	-0.768913737	1.497902271	0.000780718	0.007381065	HSD11B1
ENSBTAG00000010047	-0.337108671	4.049265224	0.000784255	0.007408395	TIAM2
ENSBTAG00000019866	-0.183979767	6.644689477	0.000785179	0.007408395	NRP1
ENSBTAG00000011818	0.82557979	1.033392345	0.000785404	0.007408395	COL26A1
ENSBTAG00000005980	-0.180391868	6.811725899	0.000786745	0.007411704	RREB1
ENSBTAG00000016987	-0.49118913	2.795230509	0.000787462	0.007411704	WDCP
ENSBTAG00000009432	0.472484375	2.888911736	0.00078755	0.007411704	PMF1
ENSBTAG00000004278	0.18116698	7.043914864	0.000790821	0.007436838	APMAP
ENSBTAG00000002755	-0.230134038	6.174857498	0.000792339	0.007445466	ANKRD12
ENSBTAG00000048415	-1.130970454	0.103042408	0.000794004	0.007455453	GPR142
ENSBTAG00000021725	-0.277159044	4.771666499	0.000798348	0.007490557	PCID2
ENSBTAG00000015698	-0.163683353	7.256528474	0.000799074	0.007491697	FYCO1
ENSBTAG00000051756	-0.458890519	2.869057767	0.000800991	0.007503992	ENSBTAG00000051756
ENSBTAG00000002275	0.164762735	7.297857405	0.000802368	0.007511211	PTP4A1
ENSBTAG00000006117	0.306842121	4.289917098	0.000803187	0.007513198	FLYWCH1
ENSBTAG00000020944	-0.180781996	7.001409027	0.000806555	0.007539005	PIEZO1
ENSBTAG00000019216	0.157984861	7.362515555	0.000810529	0.007570443	TUFM
ENSBTAG00000054127	-0.815512417	1.021578288	0.000811845	0.007572514	ENSBTAG00000054127
ENSBTAG00000013971	-0.153750353	8.587323111	0.000811974	0.007572514	PI4KA
ENSBTAG00000007658	0.220989161	5.548702918	0.000821636	0.007656861	CTNNBL1
ENSBTAG00000005691	-0.360421539	4.148588472	0.000824422	0.007677038	FGF2
ENSBTAG00000016704	0.435123921	3.426886913	0.000827629	0.007701118	SLC37A2
ENSBTAG00000039794	-0.678874247	1.832719154	0.000828911	0.007707255	CSNK1B
ENSBTAG00000002796	-0.298144489	4.445333265	0.000831911	0.007729347	KLHL3
ENSBTAG00000009305	-0.260294004	4.946175554	0.000834726	0.00774575	ANKRD27
ENSBTAG00000023840	0.308115561	4.237365545	0.000834927	0.00774575	ABRAXAS2
ENSBTAG00000052562	-1.250402702	0.556537145	0.000835704	0.007747149	ID4
ENSBTAG00000021953	0.142800943	8.727437049	0.000836531	0.007749014	LARGE1
ENSBTAG00000026716	0.190894562	6.48222686	0.000838593	0.00776231	IBTK
ENSBTAG00000047680	0.529564308	2.508926362	0.0008394	0.007763978	IRF7
ENSBTAG00000004907	-0.149483881	8.040578993	0.00085051	0.007853092	MINK1
ENSBTAG00000001597	-0.315264836	4.363140359	0.00085073	0.007853092	PITPNM2
ENSBTAG00000020996	-0.166229451	7.264705381	0.000850937	0.007853092	CLDND1
ENSBTAG00000004553	0.144443031	9.568891645	0.000856894	0.007902186	TPM4
ENSBTAG00000022294	0.171106596	6.700533937	0.000857771	0.007904381	FADS1
ENSBTAG00000023169	0.239160559	5.462890726	0.000859456	0.007914027	ENSBTAG00000023169
ENSBTAG00000008010	-0.223848487	5.583416625	0.000861436	0.007926368	FLCN
ENSBTAG00000016580	0.180818435	6.779529629	0.00086286	0.007933572	TEF
ENSBTAG00000008482	-0.169179322	8.710018428	0.000864424	0.007940699	SON
ENSBTAG00000005351	-0.347643046	3.917732737	0.000864917	0.007940699	RFXAP
ENSBTAG00000046569	0.304976884	4.263334449	0.000865882	0.007943669	CISD3
ENSBTAG00000010763	-0.258671889	5.135768298	0.000869493	0.007970892	DUSP16
ENSBTAG00000004554	0.165662832	7.174208969	0.000871543	0.007983775	CAPZB
ENSBTAG00000012168	0.227088938	5.705615921	0.000872554	0.007987126	RANBP6
ENSBTAG00000004383	-0.211756899	5.751650708	0.000873718	0.007991876	FNBP1L
ENSBTAG00000006124	-0.259902406	4.832817825	0.000874365	0.007991892	MAU2
ENSBTAG00000008288	-0.394401161	3.732262096	0.000881855	0.008051441	ANKRD26
ENSBTAG00000002843	0.338772965	3.965836551	0.000882181	0.008051441	ACOT4
ENSBTAG00000020205	-0.690204313	1.59084406	0.000884103	0.008063044	ENSBTAG00000020205
ENSBTAG00000014478	-0.336938336	4.309103925	0.000886023	0.008074614	ZSCAN29
ENSBTAG00000014227	0.182054943	6.577483447	0.000890177	0.008106502	NDFIP2
ENSBTAG00000013391	-0.297393895	4.57176312	0.00089224	0.008119317	ANKH
ENSBTAG00000000658	-1.009767095	0.449427063	0.000896046	0.008136863	WDR97
ENSBTAG00000019512	0.158972545	7.88827948	0.000896105	0.008136863	G6PD
ENSBTAG00000017280	0.556951802	2.251002612	0.000896139	0.008136863	C3
ENSBTAG00000003155	0.326452087	4.375519014	0.000902715	0.008190572	IFI27L2
ENSBTAG00000010402	0.135556631	10.76874232	0.000904547	0.008201185	MYH9
ENSBTAG00000009516	-0.227356794	5.533755855	0.000912771	0.008267246	RNF20
ENSBTAG00000048312	-0.53050226	2.439622604	0.000913169	0.008267246	ENSBTAG00000048312
ENSBTAG00000027134	0.413085747	3.506639706	0.000913844	0.008267322	DYNC1I1
ENSBTAG00000037949	1.108781878	0.032701348	0.00091499	0.00827164	GSTA5
ENSBTAG00000037457	0.189715583	6.454956188	0.000915855	0.008273424	MBD2
ENSBTAG00000013495	-0.190966219	7.290539563	0.000921201	0.008315655	WDFY3
ENSBTAG00000004161	0.162697198	7.109380325	0.000930532	0.008393763	UBE2D2
ENSBTAG00000016218	0.197887704	6.010703191	0.000936597	0.008442325	PTGES2
ENSBTAG00000001600	-0.28125645	5.033705534	0.000937994	0.008443756	DCUN1D4
ENSBTAG00000005301	0.29105187	4.662279863	0.000938119	0.008443756	KLHL32
ENSBTAG00000020215	-0.17261472	6.665017734	0.000938804	0.008443786	EXOC2
ENSBTAG00000048982	-0.913209882	1.158706508	0.000940332	0.008451387	ENSBTAG00000048982
ENSBTAG00000011209	-0.157259777	7.633501755	0.000942003	0.008460264	SYT11
ENSBTAG00000019603	0.156819716	8.524393751	0.00094305	0.008462249	LDHB
ENSBTAG00000001889	0.533911989	2.470806901	0.00094359	0.008462249	C22H3orf14
ENSBTAG00000000560	-1.200912224	0.232305851	0.000959228	0.008596267	ENSBTAG00000000560
ENSBTAG00000012693	-0.989073473	0.62145995	0.000961922	0.008613221	ENSBTAG00000012693
ENSBTAG00000021658	-0.452942117	3.422643642	0.000962511	0.008613221	TAMALIN
ENSBTAG00000012143	-0.239251981	5.212822386	0.000966539	0.008643022	TECPR2
ENSBTAG00000003619	0.162137139	7.654012668	0.000977158	0.008726675	SEC24D
ENSBTAG00000019075	0.627444718	2.085025045	0.000977303	0.008726675	METAP1D
ENSBTAG00000012058	0.292370883	4.375130547	0.000979741	0.008742143	GMDS
ENSBTAG00000011904	-0.162992268	7.510282016	0.000981011	0.00874717	HCFC1
ENSBTAG00000005215	-0.370856723	3.547153048	0.000982851	0.008756389	IL10RA
ENSBTAG00000018385	0.300656239	4.631741938	0.000983459	0.008756389	DNAJC8
ENSBTAG00000014324	-0.168925029	6.611220926	0.000986415	0.008776397	ANTXR2
ENSBTAG00000006114	-0.28866731	4.486998851	0.000994182	0.008835873	ZCCHC8
ENSBTAG00000003290	-0.337035492	4.287768547	0.000994526	0.008835873	SLC9A7
ENSBTAG00000038316	-0.198914584	5.968827768	0.000999696	0.008875435	GPATCH8
ENSBTAG00000040543	-0.198755382	5.858557112	0.001002646	0.008895251	TMEM200A
ENSBTAG00000005089	0.21847899	5.84161977	0.001013535	0.008985417	RHBDD2
ENSBTAG00000015473	0.147413869	8.331954731	0.001016036	0.008996675	RPS27A
ENSBTAG00000001131	-0.260385881	4.796406849	0.001016257	0.008996675	SLC12A9
ENSBTAG00000011843	0.144683636	9.16907361	0.001019378	0.009017853	EEF1G
ENSBTAG00000014598	-0.222383888	6.590933864	0.001023196	0.00904517	BPTF
ENSBTAG00000053086	0.265622348	5.544455493	0.001045115	0.009231938	PHLDA3
ENSBTAG00000013555	-0.411059125	3.376407876	0.001047019	0.009231938	ACVR1B
ENSBTAG00000027728	-0.261843967	4.775631458	0.001047279	0.009231938	NUDT12
ENSBTAG00000030175	-0.196388195	5.867451608	0.001047305	0.009231938	FBF1
ENSBTAG00000027201	-0.350118632	4.44888389	0.001051666	0.009263789	RAPH1
ENSBTAG00000013491	-0.288586975	4.388998873	0.001052657	0.00926593	EML1
ENSBTAG00000009994	-0.674100672	1.716951915	0.001068279	0.009396758	EML5
ENSBTAG00000017682	-0.2272894	5.749477532	0.001072956	0.009431196	TET2
ENSBTAG00000020214	-0.265802287	5.177776933	0.001076336	0.009454201	LRRC8B
ENSBTAG00000009024	-0.302949701	4.39568123	0.001078981	0.00947072	KCND1
ENSBTAG00000011154	0.146162335	7.969543864	0.001083512	0.009503755	SDC1
ENSBTAG00000001741	-0.167500351	7.361979681	0.001095904	0.009602859	DLGAP4
ENSBTAG00000025931	-0.3596768	3.671377705	0.001097494	0.009602859	NEU3
ENSBTAG00000006342	0.193531472	7.052361386	0.00109792	0.009602859	ATP5IF1
ENSBTAG00000005205	0.168548877	6.836811746	0.001098003	0.009602859	DSE
ENSBTAG00000008116	0.181491754	6.422093307	0.001098688	0.009602859	POLDIP2
ENSBTAG00000016349	-0.220377366	5.369573061	0.001105031	0.009651491	TEAD2
ENSBTAG00000000642	-0.159269438	7.056807377	0.001109751	0.009685884	INTS1
ENSBTAG00000016516	0.149134522	8.77599939	0.001115232	0.009726869	CYB5R3
ENSBTAG00000055145	0.179788472	6.718730346	0.001123593	0.009782311	ENSBTAG00000055145
ENSBTAG00000011456	-0.291498361	4.415618731	0.001123956	0.009782311	NT5C3B
ENSBTAG00000021015	-0.519433797	2.495286133	0.001124595	0.009782311	INSYN2A
ENSBTAG00000014861	-0.14722825	8.577884128	0.001124749	0.009782311	SLC20A2
ENSBTAG00000039684	0.136578312	9.260869156	0.00113141	0.009831088	CAVIN1
ENSBTAG00000001023	-0.240418208	5.793884531	0.001131944	0.009831088	ZNF598
ENSBTAG00000016334	-0.536318793	2.284619167	0.001143393	0.009923562	SATB2
ENSBTAG00000010793	0.133662463	11.74875014	0.00114825	0.009958736	CCDC80
ENSBTAG00000001086	0.213244909	5.745077997	0.001155035	0.010010572	FHL2
ENSBTAG00000013976	-0.830066421	0.925327786	0.00115679	0.010018775	AGBL3
ENSBTAG00000004138	-0.359093749	4.070764002	0.001166815	0.010098536	BICRA
ENSBTAG00000012100	-1.179429817	0.159889395	0.001170882	0.010126661	PDE1A
ENSBTAG00000003894	-0.193915741	6.197288664	0.001182527	0.010217576	NDRG4
ENSBTAG00000054719	0.293733606	4.466125009	0.001183664	0.010217576	TRNP1
ENSBTAG00000052708	-0.298944681	5.148613725	0.001183869	0.010217576	RC3H1
ENSBTAG00000021614	0.375177147	3.73692448	0.001186433	0.01023257	TASP1
ENSBTAG00000030258	-0.164816195	7.276769746	0.001187763	0.010236917	CDC42EP1
ENSBTAG00000016174	0.141481289	8.477161392	0.001188941	0.010239943	NCL
ENSBTAG00000050848	-0.417004574	3.184888218	0.001190306	0.010244568	ZCCHC2
ENSBTAG00000007921	0.442521426	2.87023189	0.001193978	0.010269043	DAPP1
ENSBTAG00000012702	0.259322022	4.744230734	0.001196243	0.010281379	ZDHHC16
ENSBTAG00000011322	-0.191983678	6.268517875	0.001197316	0.010283471	HIPK1
ENSBTAG00000000650	-0.218368129	5.578306419	0.001204749	0.010331005	TUBGCP6
ENSBTAG00000046223	-0.207332512	5.901985549	0.001205157	0.010331005	ANAPC2
ENSBTAG00000053726	-0.148593229	8.559342305	0.001205456	0.010331005	EIF4EBP2
ENSBTAG00000037566	-0.704868158	1.588727691	0.001206244	0.010331005	ZNF500
ENSBTAG00000003634	0.292914687	4.706274335	0.001207022	0.010331005	CISD1
ENSBTAG00000001414	-0.744558621	1.492442619	0.001209884	0.010348349	KCTD12
ENSBTAG00000008022	0.144070225	8.08347674	0.001217263	0.010404279	PTGFRN
ENSBTAG00000040001	-0.216141772	5.529544864	0.001219557	0.010410006	MARVELD2
ENSBTAG00000012059	0.207442115	5.868846681	0.001219614	0.010410006	MVD
ENSBTAG00000007566	-0.203040304	6.134078449	0.001224983	0.010448632	CEP170
ENSBTAG00000046328	0.725079743	1.377476982	0.001234064	0.010518847	XG
ENSBTAG00000051080	-0.26534272	4.940894034	0.001237077	0.010537275	ENSBTAG00000051080
ENSBTAG00000020989	0.367910216	3.794343356	0.00123875	0.010544272	SUSD4
ENSBTAG00000013573	0.226711752	5.331612355	0.001241637	0.010561586	BIRC5
ENSBTAG00000054062	0.45634716	3.529567698	0.001244638	0.010579852	CNGA3
ENSBTAG00000002055	-0.25632427	5.16727014	0.001248492	0.01060502	ZFP28
ENSBTAG00000019555	-0.433327341	2.952276283	0.001249312	0.01060502	ZSCAN20
ENSBTAG00000005909	0.177861236	6.871227917	0.001252094	0.010617185	LEPROT
ENSBTAG00000055296	0.197549599	5.81617695	0.00125275	0.010617185	LGALSL
ENSBTAG00000021857	-0.154632075	7.351876654	0.001253317	0.010617185	ARHGAP21
ENSBTAG00000001855	0.200509285	5.810754249	0.001257493	0.010645285	COQ9
ENSBTAG00000010976	-0.160622977	7.812747899	0.001266435	0.010713657	KANK1
ENSBTAG00000015011	-0.302864137	4.175161224	0.001270045	0.010736865	MAP11
ENSBTAG00000015938	-0.296427606	4.996784776	0.001275809	0.010778239	ARAP3
ENSBTAG00000013071	-0.361462878	3.703386011	0.001279075	0.010798458	GPR153
ENSBTAG00000006346	0.154102819	7.486452471	0.001286352	0.010847668	DAP
ENSBTAG00000021231	-0.250288268	4.805175895	0.001286655	0.010847668	KCTD2
ENSBTAG00000003804	0.214399398	5.774092001	0.001298107	0.010936772	SCCPDH
ENSBTAG00000000899	0.305332822	4.539051784	0.001300301	0.010947808	TMEM17
ENSBTAG00000020403	-0.158679651	7.168449881	0.001306878	0.010995709	ZMYM2
ENSBTAG00000014026	-0.638660939	1.789779096	0.001309603	0.011011157	PAG1
ENSBTAG00000031793	0.45534365	2.983890662	0.001311392	0.01101872	NUDT2
ENSBTAG00000021302	-0.825948555	0.681314132	0.00131297	0.011024497	CHAD
ENSBTAG00000006008	-0.164970728	6.831915124	0.001314931	0.011033484	CAMSAP1
ENSBTAG00000006593	-0.338452759	4.213029559	0.001319113	0.011061082	ANKS3
ENSBTAG00000015559	0.206282798	5.682180858	0.001320829	0.011067973	ERI3
ENSBTAG00000004651	0.269719751	4.844459716	0.001323818	0.011085522	NME1
ENSBTAG00000013238	-0.199131469	5.79719144	0.001331925	0.011145875	CDK12
ENSBTAG00000005225	-0.318987529	4.005147147	0.001336776	0.011178917	RAD52
ENSBTAG00000018768	0.185684274	6.427391606	0.001340866	0.011205546	HMGN1
ENSBTAG00000014958	-0.144823814	8.074523921	0.001345815	0.011239328	PRKAR2B
ENSBTAG00000016937	-0.260616376	4.819070703	0.001348277	0.011252302	C7H19orf67
ENSBTAG00000002392	-0.341539919	3.653115094	0.001356909	0.011316714	ENSBTAG00000002392
ENSBTAG00000013825	0.389253639	3.329229473	0.001367415	0.011396662	BCAT1
ENSBTAG00000015580	-0.338525395	4.065666113	0.001374898	0.011451321	TLE3
ENSBTAG00000043960	0.484670188	2.671752772	0.001380034	0.011486374	MTHFD2L
ENSBTAG00000011575	-0.224195614	5.586021375	0.001384814	0.011518414	RFNG
ENSBTAG00000017370	-0.461927575	3.261251109	0.001398785	0.011626817	ARFGEF3
ENSBTAG00000047418	0.148718701	9.019739481	0.001399985	0.011628985	SLC25A6
ENSBTAG00000013168	0.263319753	4.7210232	0.00141129	0.011715035	RPA3
ENSBTAG00000024555	-0.898119498	0.505787417	0.001424336	0.01181541	EFCAB2
ENSBTAG00000021250	-0.174618722	6.263743648	0.001436073	0.011904793	RALBP1
ENSBTAG00000011454	0.14835483	8.148886861	0.001438454	0.011909876	FKBP10
ENSBTAG00000027625	-0.655077685	1.831949801	0.001438609	0.011909876	SFRP1
ENSBTAG00000015119	-0.177883292	6.487317549	0.001440903	0.011920899	SIK3
ENSBTAG00000038107	0.181157366	6.141021207	0.001452443	0.012008351	MAPKAPK2
ENSBTAG00000032829	0.152659901	8.153477984	0.001456254	0.012031826	GHITM
ENSBTAG00000012675	-0.218514855	5.512883924	0.001457788	0.012034924	MYO19
ENSBTAG00000014558	0.183553814	6.505428949	0.001458573	0.012034924	DDX21
ENSBTAG00000012980	0.299878457	4.45385823	0.001462368	0.012058204	RRAGB
ENSBTAG00000000782	-1.053392358	0.018750397	0.001465795	0.012078423	KDR
ENSBTAG00000009302	0.204659273	5.730311589	0.00146728	0.012082621	RCAN2
ENSBTAG00000014017	-0.187164417	5.986636501	0.001474975	0.012137913	PCGF3
ENSBTAG00000011684	-0.163740108	6.735973668	0.001478995	0.012159329	RAB11FIP1
ENSBTAG00000026327	0.150676282	9.084105045	0.001479541	0.012159329	RPL8
ENSBTAG00000025526	-0.195269072	6.15073494	0.001484407	0.012189775	MDC1
ENSBTAG00000020781	-0.221197899	5.301113743	0.001486078	0.012189775	SETD6
ENSBTAG00000017616	0.529540032	2.478791515	0.001486198	0.012189775	ADSS1
ENSBTAG00000019587	-0.270981188	5.726793687	0.001516438	0.01242957	PI15
ENSBTAG00000003237	-0.225735077	5.24926343	0.001518703	0.012432603	IQSEC1
ENSBTAG00000031441	0.206234635	5.658428219	0.001519586	0.012432603	FXYD5
ENSBTAG00000002688	0.142528049	9.135086954	0.001520108	0.012432603	ATP1B1
ENSBTAG00000047991	-0.280251361	4.475952369	0.001520823	0.012432603	TAF4
ENSBTAG00000022847	-0.190699512	5.957650139	0.001524211	0.012447875	HEATR5A
ENSBTAG00000014943	-0.14541763	8.014461411	0.001524701	0.012447875	KDM5C
ENSBTAG00000017783	0.304783942	4.179008805	0.001528064	0.012467109	TSPYL2
ENSBTAG00000025140	-1.077882258	0.290115167	0.001538225	0.012541752	DOC2B
ENSBTAG00000015026	-0.313961007	4.712511753	0.001544513	0.01257908	ABL2
ENSBTAG00000000770	-0.432485903	3.048429156	0.001544835	0.01257908	PGM2L1
ENSBTAG00000002203	0.159201783	8.089135916	0.001547147	0.012589626	NDUFS2
ENSBTAG00000002391	0.240493226	5.405831283	0.001551786	0.012619084	TGFB1I1
ENSBTAG00000012317	0.166075726	6.866866971	0.001556721	0.012650911	PNP
ENSBTAG00000009124	-0.16500352	6.891632582	0.001559099	0.012655736	FEZ1
ENSBTAG00000000098	-0.22703991	5.304871183	0.001559443	0.012655736	SETDB1
ENSBTAG00000014151	0.279652767	4.637515859	0.00156038	0.012655736	RCSD1
ENSBTAG00000022013	0.180336498	6.11423478	0.001564286	0.012679115	CBR4
ENSBTAG00000026403	-0.174336972	7.006434693	0.001568175	0.012702322	CREBBP
ENSBTAG00000053998	-0.762690647	1.34318488	0.001574037	0.012741467	ENSBTAG00000053998
ENSBTAG00000009506	0.15119589	7.895039379	0.001575503	0.012745008	NAGA
ENSBTAG00000025644	0.133223895	9.59532228	0.001578613	0.012759365	CALM1
ENSBTAG00000021191	0.141772387	7.801987838	0.001579338	0.012759365	EHD2
ENSBTAG00000018431	-0.15209708	7.252755323	0.001584966	0.012796484	NAV2
ENSBTAG00000009517	0.161588346	7.238315973	0.001591102	0.01283765	DBI
ENSBTAG00000032527	-0.359236915	3.951401696	0.001605885	0.012942507	ERCC6
ENSBTAG00000016307	0.252438578	4.794625639	0.001606188	0.012942507	CDC7
ENSBTAG00000020644	0.16505927	7.128187186	0.001608603	0.012953545	GPC4
ENSBTAG00000030710	0.669208265	1.597043057	0.001612191	0.012973997	ITGB3BP
ENSBTAG00000021396	-0.270282619	5.105043819	0.001616793	0.012999104	HEG1
ENSBTAG00000014947	-0.155553182	7.592241314	0.00161741	0.012999104	PTPN13
ENSBTAG00000008839	-0.30129813	4.331375477	0.001619487	0.01300736	AMER1
ENSBTAG00000016024	0.163477743	7.977093224	0.001621684	0.013016565	MYL12A
ENSBTAG00000040061	-0.157032494	7.891636569	0.00162306	0.01301917	ZBTB38
ENSBTAG00000044083	-0.235976145	5.220774675	0.001627969	0.013042061	LIMK1
ENSBTAG00000004861	0.156743353	7.016524654	0.00162802	0.013042061	EIF3F
ENSBTAG00000014376	0.159468691	6.822899014	0.001629359	0.013044349	ANKRD13A
ENSBTAG00000004622	-0.258308067	5.150610139	0.00163454	0.013071536	DZANK1
ENSBTAG00000008817	0.488511132	2.622307685	0.00163521	0.013071536	LAMA4
ENSBTAG00000000147	-0.236674126	5.05371808	0.001635921	0.013071536	RIC8B
ENSBTAG00000010497	-0.264551559	4.849585517	0.001651189	0.013185026	TRAF2
ENSBTAG00000016800	-0.152478556	8.789401652	0.001657133	0.013218557	SEMA6D
ENSBTAG00000018656	0.149094376	7.367983722	0.001657523	0.013218557	HP1BP3
ENSBTAG00000008730	0.364501247	3.391098107	0.001663558	0.013258148	SFXN4
ENSBTAG00000032617	-0.769339806	1.211314886	0.001673887	0.013331894	FBXO44
ENSBTAG00000048552	0.317149155	3.864028844	0.001681674	0.013385305	ENSBTAG00000048552
ENSBTAG00000013824	-0.171879567	6.617256151	0.001683358	0.013390104	WWC3
ENSBTAG00000012022	-0.241379391	4.960004141	0.001687483	0.013410973	TBC1D2B
ENSBTAG00000015255	0.317837794	3.904478652	0.001688147	0.013410973	ST6GALNAC2
ENSBTAG00000044074	-0.233086108	5.130803338	0.00169226	0.013435023	MLLT10
ENSBTAG00000014975	-0.333604888	4.087936263	0.001704206	0.013521201	SLC4A3
ENSBTAG00000015734	0.245305116	4.881184842	0.001708116	0.013543541	RMDN1
ENSBTAG00000021062	0.171007368	6.4083292	0.001711823	0.013564256	SMARCD2
ENSBTAG00000015408	0.305250498	4.203795688	0.001728722	0.013689403	DTYMK
ENSBTAG00000007446	-0.418621125	3.079989789	0.001738291	0.013756381	NGF
ENSBTAG00000010566	0.237503011	5.241917014	0.001743068	0.013785377	TMEM11
ENSBTAG00000011913	0.137285203	8.653549357	0.001750487	0.013835218	CKAP4
ENSBTAG00000003758	0.144486096	7.671203696	0.001760915	0.01390876	TKT
ENSBTAG00000008535	-0.357002148	3.566450885	0.001774435	0.014006614	SOCS7
ENSBTAG00000008721	0.192669721	5.899215064	0.001781249	0.014051447	MANSC1
ENSBTAG00000016470	-0.236199702	5.014257659	0.001785191	0.01407358	NADSYN1
ENSBTAG00000012016	-0.296458315	4.281528193	0.001790423	0.014105847	LMTK3
ENSBTAG00000015614	-0.213513381	5.584336185	0.001795718	0.014138569	LNX2
ENSBTAG00000002699	-0.157247581	7.397377233	0.001798892	0.014154561	KIT
ENSBTAG00000017618	-0.24752074	4.852511742	0.001800104	0.014155106	MAP3K10
ENSBTAG00000053854	0.285728325	4.3226046	0.001805344	0.014187302	ABHD14A
ENSBTAG00000017816	0.30286304	4.309992581	0.001810194	0.014216391	FXYD1
ENSBTAG00000012382	0.296070254	4.219874093	0.001812629	0.014226498	KCTD9
ENSBTAG00000012622	-0.182119672	6.157482599	0.001815343	0.014238775	TRA2A
ENSBTAG00000003986	-0.14022256	7.956908967	0.001818245	0.014246786	CXXC5
ENSBTAG00000012987	-0.170058937	7.223225837	0.001818665	0.014246786	ULK1
ENSBTAG00000054195	-0.157540681	6.919174162	0.001820096	0.014248982	GPX1
ENSBTAG00000020698	-0.367338476	3.455141031	0.001827653	0.014299102	MTHFR
ENSBTAG00000022927	-0.393891602	3.09424823	0.001833201	0.014333455	RAC3
ENSBTAG00000001823	0.247556776	4.987390435	0.001838498	0.014365801	STC2
ENSBTAG00000013478	0.137456402	8.095010477	0.001842226	0.014385857	MARVELD1
ENSBTAG00000034366	-0.760777909	1.298220523	0.001847149	0.014415209	ENSBTAG00000034366
ENSBTAG00000017837	-0.313938838	4.67170041	0.001853053	0.014452183	GABRB1
ENSBTAG00000014459	-0.730894226	1.076295834	0.00185509	0.01445896	MAP6D1
ENSBTAG00000015874	0.163904995	6.723672334	0.00186624	0.014536719	CASP3
ENSBTAG00000009714	-0.687449536	1.40536437	0.001874068	0.014588517	ARHGAP33
ENSBTAG00000003679	0.305520069	4.622990954	0.001878361	0.014612754	PAAF1
ENSBTAG00000002953	0.154816175	6.950823592	0.001884296	0.014649719	TXN
ENSBTAG00000039313	-0.389212096	3.419312715	0.001894624	0.01471729	ZNF341
ENSBTAG00000012067	-0.215519373	5.452645491	0.001895364	0.01471729	EPG5
ENSBTAG00000030933	-0.346591963	3.778203919	0.001896666	0.014718174	ZNF576
ENSBTAG00000003953	-0.226553207	5.28943269	0.001898473	0.014722977	ZNF316
ENSBTAG00000013057	-0.184395701	6.053696218	0.001900562	0.01472995	CBLB
ENSBTAG00000007272	-0.225811472	5.352940026	0.001916285	0.014842519	ATP6V0A2
ENSBTAG00000014358	0.282521069	4.48823405	0.001919631	0.014859145	EVA1B
ENSBTAG00000019545	-1.018412487	0.225287549	0.001922119	0.014869106	ENSBTAG00000019545
ENSBTAG00000021469	-0.446993636	2.854363911	0.001932446	0.014934319	CTTNBP2
ENSBTAG00000005093	0.565227256	2.250399349	0.00193296	0.014934319	CES2
ENSBTAG00000005371	-0.246803014	4.869113144	0.001939524	0.014975687	DPAGT1
ENSBTAG00000010835	-0.232583148	5.301870988	0.001941872	0.014984473	CRELD1
ENSBTAG00000005969	0.161444351	6.555582359	0.001952258	0.015055243	EIF2S2
ENSBTAG00000002863	0.170437501	6.382244462	0.001953949	0.015058905	ACAA2
ENSBTAG00000013949	-0.189156009	6.242703807	0.001955229	0.015059398	AHCTF1
ENSBTAG00000008840	0.162031646	6.856239859	0.001964362	0.015120339	HM13
ENSBTAG00000002685	-0.183394183	6.385926639	0.001968741	0.015144633	PITRM1
ENSBTAG00000004330	0.450679284	2.629693109	0.001973026	0.015168171	ENO4
ENSBTAG00000025612	0.168836395	6.285356551	0.001979769	0.015206997	URM1
ENSBTAG00000000253	-0.154363345	8.520003859	0.001980532	0.015206997	PTPRF
ENSBTAG00000038794	-0.235068371	5.06238342	0.001986981	0.01524706	TMEM245
ENSBTAG00000020387	-0.168784907	6.568770288	0.002012379	0.015432395	MARF1
ENSBTAG00000025756	-0.274387753	4.467377275	0.002017396	0.01545608	FBXW12
ENSBTAG00000008761	-0.161418256	6.728833608	0.002017964	0.01545608	TRAFD1
ENSBTAG00000018272	-0.15451485	6.941818149	0.002025586	0.015501493	RERE
ENSBTAG00000009513	-0.158421673	7.66014168	0.002026396	0.015501493	TGFBI
ENSBTAG00000017468	0.244225157	5.21358755	0.002031164	0.015528373	NUCB2
ENSBTAG00000011634	-0.564129265	2.327841068	0.002037766	0.015556991	ACP3
ENSBTAG00000043584	0.133513181	11.47098541	0.002038159	0.015556991	ATP6
ENSBTAG00000023372	-0.412543358	3.096748799	0.002038676	0.015556991	MYCN
ENSBTAG00000019272	0.31681696	4.325865768	0.002053005	0.015656691	LPCAT2
ENSBTAG00000030932	0.957485889	0.103943735	0.002055834	0.015663688	IFI44L
ENSBTAG00000002816	-0.550755473	2.587147378	0.002056452	0.015663688	SARM1
ENSBTAG00000007685	0.154281039	7.019443634	0.00206104	0.015688984	PSMB1
ENSBTAG00000012319	0.223842707	5.202769171	0.0020672	0.015726215	KCNE5
ENSBTAG00000008309	-0.166515365	6.672668204	0.002080061	0.015814336	ATP13A2
ENSBTAG00000009441	-0.201601858	5.950002877	0.002089766	0.015878378	RBBP6
ENSBTAG00000013620	0.235148445	4.896622762	0.002097559	0.015927815	UCHL5
ENSBTAG00000016230	-0.277359184	4.671559242	0.002112221	0.016029321	BRWD3
ENSBTAG00000002564	-0.237009387	5.043263475	0.002114255	0.016030619	DLG4
ENSBTAG00000018423	-0.131655171	9.294448313	0.00211498	0.016030619	DDX5
ENSBTAG00000017469	-0.208768151	7.29953598	0.002122762	0.016076396	CCDC88A
ENSBTAG00000019011	0.148132729	7.245919449	0.002124838	0.016076396	PGM1
ENSBTAG00000014734	-0.131639115	9.220697902	0.002124914	0.016076396	CHD4
ENSBTAG00000001481	-0.828378622	0.710887434	0.002130756	0.01611075	IGSF9
ENSBTAG00000005970	-0.169328674	6.352936395	0.002134375	0.016128274	XBP1
ENSBTAG00000011860	-0.264807503	4.847694914	0.002138041	0.016146121	SUPT20H
ENSBTAG00000021846	-0.403384429	3.083481479	0.002144396	0.016184242	CELSR3
ENSBTAG00000019556	-0.304096938	4.220670481	0.002146507	0.016190311	MIIP
ENSBTAG00000047083	0.246743079	4.957088611	0.002148385	0.016194611	FJX1
ENSBTAG00000011304	0.175282611	6.402516931	0.002150507	0.016200745	XRN2
ENSBTAG00000021880	0.241989228	5.175681566	0.002163144	0.016286039	COQ8A
ENSBTAG00000011257	0.148525493	7.547734259	0.002173899	0.01635707	ASAH1
ENSBTAG00000018424	0.250525292	5.169034259	0.002178012	0.01637807	ACKR3
ENSBTAG00000049383	0.351053038	3.928656117	0.00218267	0.016403133	LSAMP
ENSBTAG00000020079	-0.169052079	6.434888977	0.00219286	0.016469719	MAP3K4
ENSBTAG00000030529	-0.138583042	7.734371735	0.002195524	0.016479736	FAM53C
ENSBTAG00000011572	-0.27282829	4.277010721	0.002208275	0.01656433	TSPYL5
ENSBTAG00000009649	0.944069577	0.172753437	0.002209611	0.01656433	DRC1
ENSBTAG00000018905	-0.149798274	7.167231071	0.002210806	0.01656433	MAN2A2
ENSBTAG00000019358	-0.288645749	4.439600397	0.002219264	0.016617644	RNF214
ENSBTAG00000021776	0.155955036	7.291007531	0.002221593	0.016625032	NDUFV1
ENSBTAG00000003446	-0.184563145	5.965324432	0.002226907	0.016654738	EPHB4
ENSBTAG00000045776	0.252870251	4.728209479	0.00224073	0.016748002	C3H1orf122
ENSBTAG00000017459	-0.338407807	3.966550632	0.002246495	0.016780962	DUSP18
ENSBTAG00000018527	-0.162669753	6.980217945	0.002254339	0.01682941	HDGFL3
ENSBTAG00000007003	0.190302181	5.828975143	0.002260637	0.01686626	TYMS
ENSBTAG00000015413	-0.305092853	3.882938083	0.002265413	0.016883184	RASA2
ENSBTAG00000015005	-0.275703765	4.384922002	0.002265632	0.016883184	FANCG
ENSBTAG00000010548	-0.704486127	1.385077989	0.002273273	0.016929937	LRRC6
ENSBTAG00000008025	-0.161946121	6.865014617	0.0022873	0.017022956	UBE3C
ENSBTAG00000013412	-0.303362752	5.520841666	0.002288512	0.017022956	NFAT5
ENSBTAG00000033107	0.540299958	2.03374215	0.002296592	0.017072806	OSMR
ENSBTAG00000009309	-0.242090571	4.819919676	0.002305917	0.017131842	PEX10
ENSBTAG00000020979	-0.328087233	4.045672317	0.002317745	0.017209392	NGFR
ENSBTAG00000021540	-0.199073178	5.674698426	0.002320834	0.017222007	WDR11
ENSBTAG00000021289	-0.213655531	5.83721805	0.002325035	0.017242849	POGZ
ENSBTAG00000011224	0.145567267	7.355449823	0.002332034	0.017284405	CITED2
ENSBTAG00000021588	-0.323676259	4.126183512	0.002333604	0.0172857	SCG2
ENSBTAG00000013462	-0.161457423	6.551023502	0.002348327	0.01738436	L1CAM
ENSBTAG00000017056	-0.693699567	1.426423578	0.0023545	0.017419642	PKLR
ENSBTAG00000001580	0.196957181	5.670390505	0.002359251	0.017444373	CLGN
ENSBTAG00000032369	0.247565408	4.640278092	0.002367503	0.017494947	NMI
ENSBTAG00000053271	-1.02169782	0.01751914	0.002373092	0.01750842	ENSBTAG00000053271
ENSBTAG00000023369	-0.88462645	0.315622229	0.002373168	0.01750842	GRIN2D
ENSBTAG00000012855	0.413695327	3.68066902	0.002373568	0.01750842	LPL
ENSBTAG00000018478	0.183238287	6.213316991	0.002382873	0.017566595	RPL7L1
ENSBTAG00000006017	-0.175056267	6.362147633	0.002385656	0.017576653	NFKB2
ENSBTAG00000019495	0.224819771	5.278180524	0.002392342	0.01761543	TEAD3
ENSBTAG00000003949	-0.148199371	7.416228107	0.002400242	0.017663101	RBM39
ENSBTAG00000007620	0.17647219	6.236072532	0.002410856	0.01773067	INTS11
ENSBTAG00000002980	-0.254386104	4.779055479	0.002417243	0.017767095	GPT2
ENSBTAG00000023907	0.14476343	8.573453925	0.00242419	0.017807584	COL18A1
ENSBTAG00000002615	-0.368347196	3.24648032	0.002428783	0.017830754	LONRF3
ENSBTAG00000020750	-0.173204281	6.56517515	0.002431152	0.017837571	AFF2
ENSBTAG00000007979	-0.193398629	7.202162027	0.002436915	0.017866488	TNPO1
ENSBTAG00000045509	0.638250641	1.713522272	0.002437979	0.017866488	FAM217B
ENSBTAG00000021501	-0.696823595	2.363412101	0.002443425	0.017895809	ENSBTAG00000021501
ENSBTAG00000001773	0.279696576	4.448028619	0.002455991	0.017977217	CYREN
ENSBTAG00000003776	-1.016165283	0.012856381	0.002461778	0.018008928	MSANTD1
ENSBTAG00000007651	-0.5580265	2.292910671	0.002464643	0.018019249	TARS3
ENSBTAG00000001081	0.161957419	7.756183614	0.002489053	0.018186974	PALLD
ENSBTAG00000009265	-0.15433025	7.842927185	0.002505926	0.018299467	NR5A2
ENSBTAG00000048798	-0.177143798	7.339361335	0.002522094	0.01840668	ENSBTAG00000048798
ENSBTAG00000019167	-0.132242962	8.147511445	0.002531061	0.018461243	INPPL1
ENSBTAG00000020059	-0.599655629	2.268740831	0.002547198	0.018567849	GEN1
ENSBTAG00000010138	-0.347317863	3.648656497	0.002548675	0.018567849	SEMA3B
ENSBTAG00000018883	0.176426605	5.945735958	0.002566589	0.018686204	DCTN3
ENSBTAG00000054331	-0.801382641	0.889664905	0.002567939	0.018686204	COLEC10
ENSBTAG00000049889	-0.229080606	5.142022701	0.002576332	0.018734826	ZBED4
ENSBTAG00000018349	0.206402037	5.374367296	0.002577646	0.018734826	IFI30
ENSBTAG00000020143	-0.482006219	2.701147401	0.002585273	0.01877924	RDH10
ENSBTAG00000012490	0.173356959	6.21543796	0.002590187	0.018801378	ETFA
ENSBTAG00000005761	-0.318479833	3.962435683	0.002591357	0.018801378	DEDD2
ENSBTAG00000054242	-0.252083166	4.944131835	0.002614449	0.018957817	AKAP17A
ENSBTAG00000013282	0.159926829	6.491158231	0.002621769	0.018993714	NECAP2
ENSBTAG00000033690	0.493241783	2.423067082	0.002622467	0.018993714	BARD1
ENSBTAG00000015254	0.154257217	7.490467252	0.002631766	0.019049924	GLB1
ENSBTAG00000000662	-0.174864455	6.337308102	0.002636617	0.019062878	TCF20
ENSBTAG00000047731	0.168687691	6.371868419	0.002636634	0.019062878	FAM189B
ENSBTAG00000048273	0.136040229	8.566233474	0.002640297	0.019075806	C6H4orf3
ENSBTAG00000016279	1.058504106	0.13548265	0.002641502	0.019075806	EMILIN3
ENSBTAG00000002462	0.289844204	3.99395785	0.002649188	0.019115845	MRPL47
ENSBTAG00000015338	0.476411154	2.38685895	0.002651043	0.019115845	DSCC1
ENSBTAG00000011324	0.470512164	3.100910536	0.002651677	0.019115845	EMILIN1
ENSBTAG00000010657	-0.446520638	2.883471147	0.002661817	0.019177778	ADGRB2
ENSBTAG00000022583	0.224432827	5.163508694	0.002667306	0.019206156	SHC4
ENSBTAG00000045822	-0.44511423	2.633538125	0.002682812	0.019306582	C15H11orf96
ENSBTAG00000015361	-0.558370424	2.224814436	0.002691674	0.019359106	CNTFR
ENSBTAG00000005119	0.141113442	7.437332551	0.002695632	0.019376319	PSMD1
ENSBTAG00000011580	0.125482595	9.623982885	0.002698422	0.019385129	DAG1
ENSBTAG00000021039	0.137839421	8.413836551	0.002701509	0.019396054	HNRNPM
ENSBTAG00000033891	0.194336704	5.99089574	0.002703183	0.019396662	MGAT2
ENSBTAG00000002468	-0.240402227	7.679635717	0.002704726	0.019396662	RPS28
ENSBTAG00000001368	0.132655496	9.203567875	0.002708393	0.019411716	LGALS3BP
ENSBTAG00000009188	0.182903755	6.169561394	0.002711657	0.019416666	GART
ENSBTAG00000003914	0.209623921	5.585875586	0.002712219	0.019416666	MVB12A
ENSBTAG00000002323	-0.194200719	5.63744902	0.002715734	0.019430601	USP28
ENSBTAG00000010701	0.143084015	7.442658967	0.002717617	0.019432843	NACA
ENSBTAG00000008613	-0.307441134	3.997234279	0.002720146	0.019439705	TCP11L1
ENSBTAG00000014855	-0.142805066	8.301159999	0.002733337	0.01951999	MICAL2
ENSBTAG00000014719	-0.304169948	4.264290741	0.002735485	0.01951999	TMOD1
ENSBTAG00000009194	0.172440924	6.310426487	0.002736108	0.01951999	OSBPL10
ENSBTAG00000025564	0.191250006	5.652492146	0.00274432	0.019567304	RPL36AL
ENSBTAG00000009534	0.195050325	5.782740863	0.002768005	0.019724822	NDUFB10
ENSBTAG00000014103	-0.726667139	0.986737192	0.002774523	0.019759899	SH3GL2
ENSBTAG00000005464	-0.14613534	6.9767516	0.002788266	0.019845487	ADCY6
ENSBTAG00000003550	0.254074297	4.771158475	0.002789745	0.019845487	C29H11orf54
ENSBTAG00000002012	0.224026007	5.026654419	0.002799902	0.01990631	CIAO2A
ENSBTAG00000009127	0.206690734	5.723515286	0.002803828	0.019917843	TSPYL4
ENSBTAG00000018188	0.183723136	6.11228782	0.002805473	0.019917843	NDUFC2
ENSBTAG00000013271	-0.149629596	8.011980636	0.002806349	0.019917843	NCOR1
ENSBTAG00000018227	-0.275639305	4.843762203	0.002811806	0.019945143	SLC4A7
ENSBTAG00000013914	0.221957713	5.220400349	0.002818412	0.019971091	GATB
ENSBTAG00000033313	0.241202427	4.728724155	0.002818689	0.019971091	SLC38A9
ENSBTAG00000016939	-0.427151379	3.038854575	0.002845185	0.020147294	C11H2orf42
ENSBTAG00000009439	-0.279823679	4.327203533	0.00285079	0.020175446	EDRF1
ENSBTAG00000020416	-0.635478598	2.265533005	0.002855312	0.020195908	PGAP1
ENSBTAG00000006941	-0.37516056	3.217999451	0.002857368	0.020198917	ATAT1
ENSBTAG00000038635	-0.23919344	4.809688268	0.002865548	0.020232767	ENSBTAG00000038635
ENSBTAG00000000369	0.167801726	6.094886511	0.00286633	0.020232767	EPS8
ENSBTAG00000053836	-0.30964471	3.949035598	0.002867057	0.020232767	CCDC71L
ENSBTAG00000040063	-0.620431098	1.954483366	0.002883064	0.02033414	ENSBTAG00000040063
ENSBTAG00000003307	0.148033189	6.988194089	0.002888078	0.020346682	IMMT
ENSBTAG00000023675	-0.264188024	4.874997157	0.002889157	0.020346682	ZNF654
ENSBTAG00000006609	-0.280001561	4.323099921	0.002889771	0.020346682	ERRFI1
ENSBTAG00000011287	-0.26193125	4.513129045	0.002913176	0.02049982	ATXN7
ENSBTAG00000006111	-0.235295051	4.779975224	0.002919291	0.020531188	EXOC8
ENSBTAG00000025752	0.144410356	7.292490277	0.002933582	0.020619987	P3H4
ENSBTAG00000043961	-0.16435388	6.94549364	0.002936196	0.02062665	MPDZ
ENSBTAG00000016269	-0.148420331	7.171626495	0.002943231	0.020664352	ME2
ENSBTAG00000016388	-1.02166797	0.232271733	0.002946822	0.020677841	SLCO4A1
ENSBTAG00000034373	0.143980523	7.469743358	0.002950499	0.020691891	CDH13
ENSBTAG00000000109	-0.342158785	3.609500174	0.002952861	0.020691891	NPTXR
ENSBTAG00000015487	-0.164897735	7.114653021	0.002954406	0.020691891	KDM4B
ENSBTAG00000006697	-0.229130247	5.314922192	0.002955507	0.020691891	RICTOR
ENSBTAG00000018928	0.16617001	7.048925986	0.00296123	0.020720243	QARS1
ENSBTAG00000037650	0.775941354	0.945947117	0.0029729	0.020790156	RTL9
ENSBTAG00000017500	-0.205669905	6.516626185	0.002975549	0.020796935	KCNK12
ENSBTAG00000018973	0.170824161	6.325531265	0.00298385	0.020840592	COPS3
ENSBTAG00000017530	0.197781936	5.438014227	0.00298516	0.020840592	PLGRKT
ENSBTAG00000048875	-0.28061504	4.180217008	0.002994741	0.020895697	ENSBTAG00000048875
ENSBTAG00000017368	0.129483504	8.844866866	0.003022167	0.021075194	YBX1
ENSBTAG00000006506	-0.164570856	6.252341831	0.003046008	0.021229491	GIT2
ENSBTAG00000054306	0.277144906	4.268434908	0.003052348	0.021261713	ENSBTAG00000054306
ENSBTAG00000003366	0.28435645	4.202171803	0.003073624	0.021397884	DDX58
ENSBTAG00000009125	-0.552559055	2.374536635	0.00309388	0.021518326	ALDH1A3
ENSBTAG00000014610	0.141344666	7.378077381	0.0030944	0.021518326	GPAA1
ENSBTAG00000017894	-0.205419759	5.394322613	0.003098136	0.021521223	CAD
ENSBTAG00000006894	0.945678096	0.161463113	0.003098291	0.021521223	NOS2
ENSBTAG00000008579	-0.145604685	6.91199623	0.003121231	0.021668409	RCC2
ENSBTAG00000014102	0.303780138	4.221891224	0.003123561	0.021672441	WDR77
ENSBTAG00000008916	-0.386248742	3.008540484	0.003145157	0.021810061	CYFIP2
ENSBTAG00000007334	-0.704743393	1.426831558	0.003147418	0.021813529	NFKBID
ENSBTAG00000003225	0.259523565	4.723670873	0.003151345	0.021828529	IMP4
ENSBTAG00000018347	-0.958682332	0.842451721	0.003155347	0.021844029	IL33
ENSBTAG00000002484	-0.218266596	5.138588316	0.003161243	0.021870621	CIAO3
ENSBTAG00000000943	-0.273310197	4.33300842	0.00316272	0.021870621	ZNF286A
ENSBTAG00000021061	0.160535849	6.685878368	0.003166174	0.021882294	PSMC5
ENSBTAG00000006695	-0.192414285	5.725549257	0.003173406	0.021920038	VCPIP1
ENSBTAG00000008428	1.122510844	0.064170144	0.003177876	0.021925095	UPP1
ENSBTAG00000018229	0.424199011	2.772243426	0.00317816	0.021925095	NFIX
ENSBTAG00000015944	0.203523834	5.44983362	0.003179449	0.021925095	WDR61
ENSBTAG00000009987	0.155223898	7.180769142	0.003194019	0.022013316	ITGB3
ENSBTAG00000010481	0.215915499	5.746025127	0.003203986	0.022069537	UBXN1
ENSBTAG00000016506	-0.136084312	7.574803208	0.003205741	0.022069537	ST3GAL4
ENSBTAG00000013544	0.188250575	5.751651485	0.003209771	0.022085004	LGALS8
ENSBTAG00000002562	-0.179977419	6.144617854	0.0032276	0.022195353	PRAF2
ENSBTAG00000006101	0.153855332	7.054983104	0.003253479	0.022360897	PSMD4
ENSBTAG00000021291	0.4800112	2.591766978	0.003258223	0.02238108	STXBP6
ENSBTAG00000001640	-0.19041751	5.613897747	0.00327099	0.022456327	EPB41L1
ENSBTAG00000015164	-0.961241956	0.485334901	0.003285613	0.022544221	SLC27A5
ENSBTAG00000016254	-0.14216649	7.276247953	0.003307957	0.022684967	HDAC5
ENSBTAG00000001792	0.253477896	4.794915881	0.003311283	0.022695204	MICOS13
ENSBTAG00000019888	-0.180487423	6.078512898	0.003365853	0.023056467	HIRA
ENSBTAG00000030335	0.162805597	6.904615889	0.003368719	0.023063343	ALDH4A1
ENSBTAG00000012858	0.207908926	5.707846398	0.00337942	0.023123823	NT5C2
ENSBTAG00000023970	0.987017984	0.301640022	0.003384662	0.02313007	ENSBTAG00000023970
ENSBTAG00000002571	-0.4207294	2.779515956	0.003384723	0.02313007	PDCD2L
ENSBTAG00000020115	-0.153267739	6.731586907	0.003385936	0.02313007	UBE2O
ENSBTAG00000006862	-0.307534721	4.113784501	0.003394427	0.023174455	MEIS3
ENSBTAG00000012632	0.173929964	6.737416361	0.003396176	0.023174455	TECR
ENSBTAG00000019369	-0.256446284	4.638985009	0.003401242	0.023196244	TSPAN4
ENSBTAG00000017761	-0.207208563	5.509341747	0.003403785	0.02320081	SMC1A
ENSBTAG00000008925	-0.27781849	4.606105075	0.003408418	0.023219612	MRE11
ENSBTAG00000010812	0.167138841	6.106869232	0.003411339	0.023226738	P2RX4
ENSBTAG00000021992	-0.674933885	1.206193236	0.00341997	0.023272706	CAVIN4
ENSBTAG00000003665	-1.066801351	0.50895761	0.00342622	0.023302436	NUP210
ENSBTAG00000002706	0.394345881	3.178525392	0.003429073	0.02330904	GSTZ1
ENSBTAG00000003601	-0.915615758	0.111027037	0.003439221	0.023365195	ZMAT1
ENSBTAG00000016775	-0.174605091	6.077038287	0.003441707	0.023369264	SLC27A1
ENSBTAG00000022622	-0.893957004	0.418616795	0.003450906	0.023412047	CISH
ENSBTAG00000025434	-0.138877456	8.208509209	0.003451788	0.023412047	ZFP36L1
ENSBTAG00000031327	0.235540131	5.247977132	0.003459167	0.02344925	TRMT61A
ENSBTAG00000004498	-0.364325396	3.434007782	0.003461571	0.023452714	ESR2
ENSBTAG00000005012	-0.148904147	7.410807207	0.003470847	0.023502698	HSPH1
ENSBTAG00000048331	-0.416473913	2.895716221	0.003476248	0.023526412	ENSBTAG00000048331
ENSBTAG00000009263	0.147891244	6.843290262	0.003486799	0.023584928	MFSD1
ENSBTAG00000021187	-0.1569759	6.660183367	0.003491144	0.023601426	ID2
ENSBTAG00000014249	-0.134798205	8.671932011	0.003501973	0.023661718	IVNS1ABP
ENSBTAG00000016266	0.178640025	6.106676887	0.003510958	0.023709493	SDHD
ENSBTAG00000011578	0.154925978	6.713268073	0.003514993	0.023723807	CD44
ENSBTAG00000009785	-0.153607928	6.685211587	0.003525137	0.023779315	SAMD4B
ENSBTAG00000015943	0.15648899	6.5244277	0.003546818	0.023912545	MICU2
ENSBTAG00000003192	-0.270550495	4.18322404	0.003554439	0.023950885	TBC1D16
ENSBTAG00000019704	0.149750762	8.234020895	0.003563013	0.023995605	HLTF
ENSBTAG00000031998	0.255742468	4.680098519	0.003579395	0.024092827	CXCL16
ENSBTAG00000025258	-0.386607022	3.29455802	0.003581734	0.024095479	ENSBTAG00000025258
ENSBTAG00000000040	-0.23669566	5.086666812	0.003595501	0.024174961	MAFG
ENSBTAG00000019336	-0.157168322	6.459117777	0.003631539	0.024390842	DVL3
ENSBTAG00000007115	0.175853555	5.923514358	0.003631547	0.024390842	GSR
ENSBTAG00000012926	-0.239079413	4.814179648	0.003634372	0.024396582	TM6SF1
ENSBTAG00000011876	-0.393161622	3.543743263	0.003642157	0.024435599	MORC3
ENSBTAG00000002480	0.489502838	2.577800611	0.003645731	0.024446333	NUDT1
ENSBTAG00000013651	0.233423628	4.886897282	0.003652657	0.024467432	DNAJB12
ENSBTAG00000010107	-0.651516019	1.277632555	0.003653754	0.024467432	WHRN
ENSBTAG00000017527	-0.171031122	6.224175525	0.003654804	0.024467432	CRYBG1
ENSBTAG00000040360	-0.937975917	0.180828073	0.003669127	0.024548183	CCDC166
ENSBTAG00000001353	0.1507311	7.396376792	0.00367083	0.024548183	PMPCA
ENSBTAG00000017812	-0.25876384	4.781226262	0.003677083	0.024576728	ALS2CL
ENSBTAG00000049718	-0.409054539	2.75210166	0.003691931	0.024662655	ENSBTAG00000049718
ENSBTAG00000046239	-0.341068984	4.046051241	0.00369407	0.024663641	LCOR
ENSBTAG00000018479	0.252889194	4.669872296	0.003707847	0.024742289	PTPMT1
ENSBTAG00000012630	0.315147771	3.7784573	0.003711562	0.024747126	PAMR1
ENSBTAG00000000713	0.180039996	6.676190764	0.003712568	0.024747126	AGFG2
ENSBTAG00000049130	0.852651222	0.479222278	0.003723329	0.024805505	ENSBTAG00000049130
ENSBTAG00000020447	0.152524514	6.549251716	0.003728553	0.024826949	VSIG10L
ENSBTAG00000016147	0.338567153	3.763069981	0.003752621	0.024973783	CETN4
ENSBTAG00000007520	0.212550449	5.28252039	0.003761654	0.025020453	MAPRE2
ENSBTAG00000051726	0.749910521	0.96281084	0.003770416	0.025065275	ENSBTAG00000051726
ENSBTAG00000021636	-0.237862842	5.326514896	0.003778371	0.025102257	GPR155
ENSBTAG00000015000	0.124381814	9.547798997	0.003780033	0.025102257	VCP
ENSBTAG00000003727	0.14886543	6.793447676	0.003784325	0.025117291	SH3KBP1
ENSBTAG00000011482	-0.133916655	7.842876988	0.003793841	0.025166961	SLC43A2
ENSBTAG00000001579	-0.229776312	4.992248353	0.003798159	0.025182117	AGO2
ENSBTAG00000013946	-0.242525402	4.968113572	0.003813511	0.025270376	PRPF3
ENSBTAG00000050396	0.367917139	3.1626009	0.003832257	0.025381019	ENSBTAG00000050396
ENSBTAG00000050061	-0.226294416	5.020025641	0.003836212	0.025393632	INCENP
ENSBTAG00000010720	-0.166419632	6.552378359	0.003839907	0.025397846	MIB2
ENSBTAG00000000671	-0.36023885	3.285258888	0.00384095	0.025397846	PARP3
ENSBTAG00000003751	-0.909920924	0.195644134	0.003845332	0.025403351	MACC1
ENSBTAG00000007634	-0.242399012	6.211100597	0.003845885	0.025403351	HOOK3
ENSBTAG00000010243	-0.200059472	5.397912865	0.003850963	0.025423338	RBM33
ENSBTAG00000024605	-0.210823815	6.087109609	0.00385738	0.025452134	DYNLL1
ENSBTAG00000021310	-0.240928399	4.742678759	0.003860919	0.025461916	COL4A4
ENSBTAG00000004193	-0.166725634	6.184586725	0.003865975	0.025481692	VEZF1
ENSBTAG00000054639	-0.742158633	0.877712018	0.003868186	0.025482701	ENSBTAG00000054639
ENSBTAG00000003947	0.229635219	5.277433521	0.003893003	0.025632556	SSBP4
ENSBTAG00000052369	0.213973474	6.133322399	0.003913404	0.025753191	ENSBTAG00000052369
ENSBTAG00000018274	0.234551447	4.960913017	0.003923296	0.02580458	FADD
ENSBTAG00000012470	0.253680377	4.338317562	0.003940406	0.025903356	SNAPIN
ENSBTAG00000024378	0.235234687	4.818089633	0.003954807	0.025984234	MRPS21
ENSBTAG00000010423	-0.518721577	2.304352972	0.003964253	0.026025024	LIFR
ENSBTAG00000011268	-0.280406494	4.042111049	0.003965218	0.026025024	TMEM64
ENSBTAG00000000250	0.243789718	4.818478213	0.003979927	0.02610022	HDHD3
ENSBTAG00000043553	-0.208416665	5.160737252	0.003980889	0.02610022	GPX3
ENSBTAG00000011857	0.332443084	3.565743203	0.003984083	0.026107337	PPM1H
ENSBTAG00000001573	-0.192112446	6.092926167	0.003987964	0.026118952	JMJD1C
ENSBTAG00000004291	-0.180670258	6.019454911	0.00399682	0.026163119	SEPTIN6
ENSBTAG00000038181	-0.177821886	5.930123952	0.004002684	0.026180735	FOCAD
ENSBTAG00000015955	0.131491362	7.834173368	0.004003739	0.026180735	ERGIC1
ENSBTAG00000018711	-0.199242208	5.393643042	0.00400941	0.026194553	DENND4B
ENSBTAG00000027064	-0.156296192	6.454716956	0.004010083	0.026194553	BTBD11
ENSBTAG00000010772	0.214994101	5.581833115	0.004012779	0.026198352	TPGS1
ENSBTAG00000010030	-0.245136888	4.696933583	0.004018955	0.026224847	EPHA4
ENSBTAG00000002408	0.326269709	3.693862697	0.00402342	0.026240158	FHAD1
ENSBTAG00000047874	-0.197993009	5.419937429	0.004046577	0.026377291	PRPF38B
ENSBTAG00000018589	0.242174196	4.744486834	0.004064019	0.026477049	RFC2
ENSBTAG00000052987	-0.67740694	2.748875946	0.004067965	0.026488828	ENSBTAG00000052987
ENSBTAG00000012064	-0.377130379	3.385838464	0.004076198	0.026528485	ZNF473
ENSBTAG00000026993	0.146725381	7.222965999	0.004080908	0.02653534	TMBIM4
ENSBTAG00000038990	-0.215925547	4.952010485	0.004081536	0.02653534	TRAF4
ENSBTAG00000011351	0.134692007	8.01894672	0.004086697	0.026554956	TMEM259
ENSBTAG00000014737	-0.251270033	4.606906027	0.004094441	0.026556601	VEGFC
ENSBTAG00000005863	-0.283210176	4.175357069	0.004094479	0.026556601	ATF7
ENSBTAG00000019692	-0.153621406	6.543072775	0.004094902	0.026556601	BCL2L2
ENSBTAG00000010531	-0.894092874	0.83020659	0.004097502	0.026556601	CYP1B1
ENSBTAG00000021204	-0.182150348	5.766249772	0.004097672	0.026556601	TES
ENSBTAG00000020806	-0.33358352	3.473447019	0.004100141	0.026558709	HELB
ENSBTAG00000008082	-0.19624512	6.562016715	0.004113225	0.026614352	CEP350
ENSBTAG00000050453	-0.311928658	3.666968789	0.004115036	0.026614352	ENSBTAG00000050453
ENSBTAG00000008453	0.335749934	3.467741951	0.004115178	0.026614352	LBR
ENSBTAG00000013114	-0.166275763	6.430144071	0.004120077	0.026625131	ZMYND8
ENSBTAG00000000827	-0.235476107	5.482790068	0.004121872	0.026625131	TAOK1
ENSBTAG00000002069	0.179276533	5.940529261	0.004123294	0.026625131	BOLA
ENSBTAG00000039161	0.144247607	7.259660081	0.004126912	0.026633811	ALDH3A2
ENSBTAG00000012448	0.1873828	5.543044294	0.004130125	0.026633811	CCDC91
ENSBTAG00000049552	-0.931509667	0.00445804	0.00413109	0.026633811	ENSBTAG00000049552
ENSBTAG00000005296	0.1326023	9.496004195	0.004137999	0.026664474	RPL13A
ENSBTAG00000000281	0.584509363	1.614262356	0.00415022	0.026716584	MND1
ENSBTAG00000011934	0.383655809	3.063640988	0.0041504	0.026716584	PCK2
ENSBTAG00000013030	-0.147209146	7.154205873	0.004162516	0.026767088	LRRC8A
ENSBTAG00000011498	-0.304997317	4.088807615	0.004162569	0.026767088	ZNF184
ENSBTAG00000005816	0.248018467	4.529606603	0.004185139	0.026898261	IRF9
ENSBTAG00000049676	-0.83414143	0.784715075	0.004188075	0.026903167	ENSBTAG00000049676
ENSBTAG00000016592	-0.205174982	5.468444769	0.004200584	0.026957096	CAPN15
ENSBTAG00000015428	-0.314889833	3.542942701	0.004200823	0.026957096	TMEM170A
ENSBTAG00000049173	-0.555600564	2.184457703	0.004208158	0.026976388	ENSBTAG00000049173
ENSBTAG00000032436	-0.260023269	7.268826086	0.004208186	0.026976388	UBC
ENSBTAG00000002378	0.123011554	9.175529589	0.004233708	0.027125956	NUCB1
ENSBTAG00000008109	0.188517896	5.767693284	0.00424396	0.027177583	TMEM97
ENSBTAG00000005660	0.125006043	8.632899605	0.004248736	0.027190269	PSMD2
ENSBTAG00000012962	0.160890024	6.401274585	0.004250332	0.027190269	SARS1
ENSBTAG00000048107	-0.117430711	9.910915237	0.004283679	0.027389448	CANX
ENSBTAG00000009087	0.165002098	6.271677758	0.004287422	0.027399235	GNG10
ENSBTAG00000018888	-0.290011668	4.001657919	0.004300477	0.027468491	DPH2
ENSBTAG00000021879	0.124814309	9.57270518	0.004311836	0.027526853	VCL
ENSBTAG00000017721	0.276431772	4.273975657	0.004328286	0.027617633	EEF1AKNMT
ENSBTAG00000016827	0.149381377	6.781765352	0.00434208	0.027686944	RGL2
ENSBTAG00000001721	0.209317784	5.37809079	0.00434362	0.027686944	GYG1
ENSBTAG00000010736	0.391195188	3.306947091	0.004346511	0.027691123	BBS5
ENSBTAG00000049995	-1.095145827	0.553861481	0.004428076	0.028196256	ENSBTAG00000049995
ENSBTAG00000016725	0.310302658	3.962103964	0.004437589	0.028242314	KIAA1143
ENSBTAG00000009159	-0.136389422	7.790010507	0.004455067	0.028338988	PLXNA1
ENSBTAG00000003644	0.205341699	5.305219608	0.004470901	0.02842511	HSPBP1
ENSBTAG00000002026	0.12385765	8.803249612	0.004479125	0.028461971	RPL5
ENSBTAG00000025903	-0.152375446	7.257844872	0.004481592	0.028461971	GLDC
ENSBTAG00000013047	-0.504970819	2.297620292	0.004483594	0.028461971	GRM7
ENSBTAG00000007097	-0.304023976	3.739566991	0.004486496	0.028465806	THTPA
ENSBTAG00000010928	-0.238704148	4.660806706	0.004501397	0.028545723	CSRNP2
ENSBTAG00000014576	-0.23534649	5.104809978	0.004509427	0.028582016	GUCY1A1
ENSBTAG00000046840	0.210064162	5.479743051	0.00451421	0.028586779	DEXI
ENSBTAG00000001212	0.159425785	7.539113798	0.004515314	0.028586779	SSR2
ENSBTAG00000009256	-0.204808564	5.885100313	0.004520512	0.028586779	ITGA4
ENSBTAG00000003051	-0.263141916	4.320730152	0.004521101	0.028586779	FER
ENSBTAG00000021102	0.162743104	7.029826617	0.00452172	0.028586779	GALM
ENSBTAG00000010956	0.119289688	9.661361112	0.004527299	0.028607447	SCARB2
ENSBTAG00000020552	-0.188231718	5.653981599	0.004535887	0.028647101	PRDM2
ENSBTAG00000040569	0.215277084	5.318293885	0.004539516	0.028655403	NLRX1
ENSBTAG00000039922	-0.951061821	0.101837357	0.004542912	0.028662235	ARAP2
ENSBTAG00000022238	-0.192357498	5.488288949	0.004556594	0.028733916	B4GAT1
ENSBTAG00000023997	0.217777169	5.032356498	0.004579839	0.028865802	VAMP8
ENSBTAG00000006878	-0.204008881	5.26639888	0.004588926	0.028908367	ENSBTAG00000006878
ENSBTAG00000050602	-0.500205977	2.432746403	0.00459433	0.028916747	HAS3
ENSBTAG00000051225	-0.473189603	2.627772104	0.004594926	0.028916747	ENSBTAG00000051225
ENSBTAG00000002539	-0.146141381	6.689925327	0.004601029	0.02894045	TRIOBP
ENSBTAG00000001748	-0.366122974	3.079982179	0.004604475	0.02894742	TRIM45
ENSBTAG00000007814	0.238331314	4.702936579	0.004623039	0.029049386	WWTR1
ENSBTAG00000010799	0.126333045	9.15800674	0.004645118	0.029173319	MYL6
ENSBTAG00000004881	0.247443093	4.731022247	0.004659828	0.029250874	MTHFD2
ENSBTAG00000006869	-0.18485114	5.810447545	0.004663581	0.029259601	PHF20L1
ENSBTAG00000006963	0.138193943	7.583354617	0.004669759	0.029283529	RPL12
ENSBTAG00000019722	0.567601149	1.98599399	0.004678872	0.029321386	GUCY2C
ENSBTAG00000011626	-0.160016378	6.770783842	0.004680531	0.029321386	ATP2C1
ENSBTAG00000009078	0.522955202	1.929923326	0.004686243	0.029342324	MIA
ENSBTAG00000026684	0.147773019	6.694578866	0.00468962	0.029348632	SYNC
ENSBTAG00000021259	-0.346351114	3.431122035	0.004697078	0.02938046	C2CD2
ENSBTAG00000046708	0.395835724	3.127350296	0.004712782	0.029463809	PDP2
ENSBTAG00000047582	-0.18146608	5.560327157	0.004730079	0.029548191	CSNK1E
ENSBTAG00000004464	-0.573111109	1.628605569	0.004732051	0.029548191	HROB
ENSBTAG00000024021	-0.904426501	0.117631817	0.004733437	0.029548191	NRXN1
ENSBTAG00000008886	-0.251512328	4.498871823	0.004736715	0.029553759	STOX2
ENSBTAG00000047450	0.511041184	2.048930078	0.004776791	0.029788802	SFR1
ENSBTAG00000003820	-0.18775271	5.518788264	0.004783155	0.029813477	GRAMD1A
ENSBTAG00000012790	0.314845947	3.548221379	0.004789422	0.029837522	TRIAP1
ENSBTAG00000035907	-0.124630493	8.245777227	0.00479411	0.029851711	DDX3X
ENSBTAG00000033749	-0.807812366	0.410851971	0.004810292	0.029937417	ENSBTAG00000033749
ENSBTAG00000052143	-0.405342751	2.897188695	0.004821978	0.029977879	ENSBTAG00000052143
ENSBTAG00000025767	-0.473853526	2.369143273	0.004822118	0.029977879	ENSBTAG00000025767
ENSBTAG00000027426	0.703604553	1.784514225	0.004824054	0.029977879	ENSBTAG00000027426
ENSBTAG00000013218	0.138866884	7.109150929	0.00482878	0.029992196	GORASP2
ENSBTAG00000018825	-0.300678877	3.934823282	0.004870798	0.030230366	SSH1
ENSBTAG00000015572	-0.174391631	6.013854682	0.004872007	0.030230366	YTHDC1
ENSBTAG00000021421	0.153549968	6.830947648	0.004875408	0.030236316	SSR4
ENSBTAG00000006551	0.454171208	2.437431681	0.004904323	0.030400419	ESCO2
[truncated: 10,387 more rows]
