# Supplementary material for: Transcriptome Reveals Granulosa Cells Coping through Redox, Inflammatory and Metabolic Mechanisms under Acute Heat Stress
Source: Cells. 2022 Apr 25;11(9):1443. doi: 10.3390/cells11091443 (PMC9105522; doi:10.3390/cells11091443)
Supplement: Supplementary file 1 [file cells-11-01443-s001.zip › Supplementary Table S3.csv]

Supplementary Table S3: List of all significant (p < 0.05) differentially expressed (DEGs) in response to heat stress in granulosa cells.
Name	logFC	logCPM	PValue	FDR	Description	threshold
ENSBTAG00000025848	1.664540088	8.161048389	1.73E-260	2.15E-256	RBM3	Up
ENSBTAG00000011689	-0.905251713	7.452750508	9.18E-45	5.69E-41	LENG8	Down
ENSBTAG00000050495	0.716663875	6.912422414	1.28E-41	5.29E-38	GREM1	Up
ENSBTAG00000014614	0.801902499	7.0982792	1.70E-40	5.26E-37	ACTA2	Up
ENSBTAG00000015405	-0.968415946	5.882808257	2.12E-39	5.24E-36	DCHS1	Down
ENSBTAG00000051191	-1.411486828	6.698962192	7.35E-38	1.52E-34	ENSBTAG00000051191	Down
ENSBTAG00000011002	-1.213934732	4.187717252	3.60E-35	6.36E-32	CCDC136	Down
ENSBTAG00000001173	-0.631710457	6.685462406	1.33E-34	2.06E-31	PLXNA2	Down
ENSBTAG00000002128	-0.947690481	4.997729539	1.08E-33	1.22E-30	MPPE1	Down
ENSBTAG00000048958	-0.764595396	6.498302025	2.69E-33	2.77E-30	ENSBTAG00000048958	Down
ENSBTAG00000018161	-0.652300717	6.369464326	6.59E-30	5.10E-27	TBX18	Down
ENSBTAG00000000625	-0.776459643	5.606222901	1.30E-29	9.51E-27	SMAD6	Down
ENSBTAG00000017666	-0.736575831	5.414250068	6.78E-28	4.42E-25	ABCC5	Down
ENSBTAG00000002425	-1.003460888	4.030520868	3.53E-25	2.08E-22	SCN9A	Down
ENSBTAG00000049375	-0.78690861	5.348435284	5.95E-24	2.95E-21	ENSBTAG00000049375	Down
ENSBTAG00000015222	-1.069810679	4.167745601	5.89E-21	1.97E-18	RSRP1	Down
ENSBTAG00000003822	-0.698932541	5.301509143	1.05E-20	3.42E-18	CROCC	Down
ENSBTAG00000003152	0.736913454	5.160980056	1.84E-20	5.70E-18	IFI27	Up
ENSBTAG00000016991	-0.805377972	4.554796541	1.65E-19	4.75E-17	EFNB2	Down
ENSBTAG00000005339	-0.710218254	8.519812875	1.05E-18	2.82E-16	VEGFA	Down
ENSBTAG00000004046	-1.678774412	1.963829778	1.29E-17	3.02E-15	DTX4	Down
ENSBTAG00000007079	0.597040486	5.669620355	1.84E-17	4.23E-15	LCP1	Up
ENSBTAG00000044097	-0.744979234	4.374699734	8.78E-16	1.81E-13	KLF7	Down
ENSBTAG00000002299	-0.728315304	4.703211061	1.01E-15	2.04E-13	SEL1L3	Down
ENSBTAG00000011772	-0.841897388	3.814175951	3.66E-15	6.76E-13	PPP1R12B	Down
ENSBTAG00000017751	-1.092553284	3.030531113	4.76E-15	8.68E-13	RGS9	Down
ENSBTAG00000051239	-1.076368497	3.099659549	7.52E-15	1.33E-12	ENSBTAG00000051239	Down
ENSBTAG00000007753	-0.692966775	4.629626403	2.05E-14	3.44E-12	KIFC2	Down
ENSBTAG00000006039	0.860883226	3.495737848	3.37E-13	4.97E-11	ARHGDIB	Up
ENSBTAG00000051385	-1.051880501	2.991380717	1.06E-12	1.39E-10	ENSBTAG00000051385	Down
ENSBTAG00000017239	-0.626265899	4.31159869	1.44E-12	1.86E-10	GABBR1	Down
ENSBTAG00000020975	-0.643126309	4.525883226	3.68E-12	4.52E-10	SYNGAP1	Down
ENSBTAG00000051406	-2.73043307	-0.376213554	5.16E-12	6.26E-10	ENSBTAG00000051406	Down
ENSBTAG00000003921	-0.884448063	3.340403945	1.02E-11	1.16E-09	ENSBTAG00000003921	Down
ENSBTAG00000010987	-0.750521604	4.092869192	1.04E-11	1.17E-09	NFKBIZ	Down
ENSBTAG00000004797	-0.629165054	4.372052955	1.14E-11	1.26E-09	TRMT44	Down
ENSBTAG00000053319	-1.543033533	1.619923216	1.17E-11	1.29E-09	ENSBTAG00000053319	Down
ENSBTAG00000013697	-0.629371995	4.24871998	1.36E-11	1.45E-09	CLASRP	Down
ENSBTAG00000051139	-1.644314347	1.011133848	3.08E-11	3.02E-09	ENSBTAG00000051139	Down
ENSBTAG00000017461	-0.60128334	6.855352727	5.12E-11	4.80E-09	SLC16A3	Down
ENSBTAG00000001796	-0.834401715	3.170636284	8.23E-11	7.44E-09	CATSPERD	Down
ENSBTAG00000009691	-0.649532224	4.021865404	8.37E-11	7.45E-09	SH2B2	Down
ENSBTAG00000023179	-0.923864599	2.749675423	2.68E-10	2.19E-08	TRIB1	Down
ENSBTAG00000048204	-1.63030858	0.883883855	3.32E-10	2.69E-08	SPACA6	Down
ENSBTAG00000044092	0.97618311	2.536761363	4.55E-10	3.60E-08	IQCK	Up
ENSBTAG00000006805	-1.010858688	2.701757456	5.18E-10	4.01E-08	ZNF180	Down
ENSBTAG00000002878	-1.225382268	2.055998355	5.77E-10	4.38E-08	CHRD	Down
ENSBTAG00000050861	-2.095963372	-0.007587125	6.36E-10	4.80E-08	ENSBTAG00000050861	Down
ENSBTAG00000008778	-1.756572794	0.590713883	9.94E-10	7.32E-08	CHST13	Down
ENSBTAG00000004835	-1.027934648	2.271953358	1.66E-09	1.16E-07	HOXD3	Down
ENSBTAG00000007156	-0.912768854	2.742128397	2.31E-09	1.52E-07	AGAP2	Down
ENSBTAG00000020843	0.616208372	3.984262076	2.99E-09	1.94E-07	PCSK1	Up
ENSBTAG00000019901	-0.739203127	3.362941143	3.09E-09	2.00E-07	RAD54L	Down
ENSBTAG00000053553	-2.02988822	-0.041120424	3.79E-09	2.37E-07	ENSBTAG00000053553	Down
ENSBTAG00000014270	-0.625009328	4.181450566	4.13E-09	2.57E-07	UNC5B	Down
ENSBTAG00000006541	-1.504974562	0.799466697	4.57E-09	2.79E-07	ATP2A1	Down
ENSBTAG00000006255	-0.682578867	3.600953542	7.87E-09	4.55E-07	MDM4	Down
ENSBTAG00000010947	-1.278829833	2.248219065	7.90E-09	4.55E-07	PHYHIPL	Down
ENSBTAG00000048486	-0.718521332	3.580392472	7.96E-09	4.56E-07	IQANK1	Down
ENSBTAG00000011844	-0.913340012	2.781820534	1.38E-08	7.52E-07	ENSBTAG00000011844	Down
ENSBTAG00000040361	-0.616171793	4.300953441	1.45E-08	7.78E-07	LFNG	Down
ENSBTAG00000018142	0.612463185	3.740395899	1.46E-08	7.82E-07	DTL	Up
ENSBTAG00000002036	-0.810153834	3.067367409	1.60E-08	8.49E-07	CACNB1	Down
ENSBTAG00000000621	-0.59497623	4.044693488	1.65E-08	8.65E-07	CATSPERG	Down
ENSBTAG00000020489	-0.724011351	3.072357885	1.98E-08	1.03E-06	SEMA6A	Down
ENSBTAG00000006991	0.767238927	3.044017775	2.05E-08	1.06E-06	ADH6	Up
ENSBTAG00000051412	-1.962408816	1.194334058	2.41E-08	1.21E-06	HBA	Down
ENSBTAG00000003919	-0.679554153	3.445326181	2.41E-08	1.21E-06	KIAA0408	Down
ENSBTAG00000020997	-1.464369764	0.816687598	3.12E-08	1.55E-06	GPR15	Down
ENSBTAG00000001032	1.908202458	-0.084013314	6.16E-08	2.80E-06	PYGM	Up
ENSBTAG00000021862	-1.560635246	0.461745506	7.44E-08	3.31E-06	SLC27A3	Down
ENSBTAG00000019741	0.748157181	2.903010426	8.16E-08	3.60E-06	C3AR1	Up
ENSBTAG00000021685	-0.842354102	2.893001415	1.02E-07	4.32E-06	EEF1A2	Down
ENSBTAG00000047648	-1.64203742	0.38422933	1.11E-07	4.64E-06	SYT2	Down
ENSBTAG00000001139	-0.602260861	3.538928995	1.12E-07	4.67E-06	ACHE	Down
ENSBTAG00000022169	0.839854914	3.250974482	1.26E-07	5.12E-06	PREX2	Up
ENSBTAG00000020538	0.728943375	3.173337289	1.39E-07	5.59E-06	HERC5	Up
ENSBTAG00000004094	0.657333746	3.377067143	1.71E-07	6.68E-06	SPARCL1	Up
ENSBTAG00000047254	-0.587638664	3.990761631	1.89E-07	7.20E-06	ABCA2	Down
ENSBTAG00000053453	-1.639358042	0.324573926	2.15E-07	8.03E-06	ENSBTAG00000053453	Down
ENSBTAG00000014543	-1.122404364	1.804239345	2.35E-07	8.70E-06	PLXNA4	Down
ENSBTAG00000009725	0.636511077	3.640356287	2.70E-07	9.81E-06	AOX1	Up
ENSBTAG00000003622	-0.927097301	2.027092096	2.86E-07	1.03E-05	ZKSCAN7	Down
ENSBTAG00000002321	-0.663876151	3.838974819	3.25E-07	1.16E-05	AMT	Down
ENSBTAG00000006835	-0.607890028	3.362710686	4.21E-07	1.45E-05	MCAM	Down
ENSBTAG00000045625	-2.044754363	-0.63452167	4.31E-07	1.48E-05	NTN3	Down
ENSBTAG00000001123	-0.674544801	2.927458273	4.57E-07	1.55E-05	SNRNP48	Down
ENSBTAG00000000395	1.806806762	-0.242552583	5.24E-07	1.74E-05	ADAMTS20	Up
ENSBTAG00000008614	1.83540171	-0.326576897	5.45E-07	1.80E-05	KASH5	Up
ENSBTAG00000054512	-1.126056709	1.342381987	5.97E-07	1.95E-05	IGSF1	Down
ENSBTAG00000014229	-1.122853369	1.35638535	6.33E-07	2.03E-05	SYT17	Down
ENSBTAG00000020895	0.802708832	2.886383845	6.37E-07	2.04E-05	LOXL4	Up
ENSBTAG00000019210	-0.732863649	2.833872549	6.96E-07	2.20E-05	ADCY2	Down
ENSBTAG00000025775	-1.403627854	0.403575528	8.06E-07	2.50E-05	INSL3	Down
ENSBTAG00000018723	-1.093501262	1.371823081	8.24E-07	2.55E-05	SLC25A34	Down
ENSBTAG00000034220	0.669514963	3.417234947	1.01E-06	3.03E-05	ENSBTAG00000034220	Up
ENSBTAG00000010509	-0.924949007	1.888690796	1.21E-06	3.56E-05	CDK3	Down
ENSBTAG00000011483	-0.911208603	2.085995937	1.25E-06	3.68E-05	SCARF1	Down
ENSBTAG00000011590	0.724448041	2.69966204	1.77E-06	4.96E-05	GLIPR1	Up
ENSBTAG00000017701	-1.656394389	-0.195797203	1.89E-06	5.28E-05	CYP2W1	Down
ENSBTAG00000010820	-1.057068572	1.823591265	1.94E-06	5.38E-05	WNT11	Down
ENSBTAG00000050986	-0.776171795	2.557863733	1.96E-06	5.41E-05	PXDN	Down
ENSBTAG00000011327	0.772514842	2.861090259	2.13E-06	5.79E-05	OLFML3	Up
ENSBTAG00000009924	0.600398804	3.222395928	2.13E-06	5.79E-05	MR1	Up
ENSBTAG00000018125	-0.749465401	2.553211151	2.20E-06	5.96E-05	KIF5C	Down
ENSBTAG00000012036	-1.158570067	1.289380626	2.23E-06	6.00E-05	HR	Down
ENSBTAG00000021576	0.925654627	2.195085742	2.25E-06	6.02E-05	LMOD1	Up
ENSBTAG00000033642	-0.831418884	2.242544952	2.35E-06	6.26E-05	ENSBTAG00000033642	Down
ENSBTAG00000012854	-1.779914843	-0.430053938	2.70E-06	7.00E-05	GSDMB	Down
ENSBTAG00000052909	-0.683040818	2.761904083	3.19E-06	8.04E-05	C8G	Down
ENSBTAG00000046266	0.941062746	1.789329067	3.27E-06	8.21E-05	TNFSF9	Up
ENSBTAG00000046110	-0.906007695	1.835152968	3.57E-06	8.84E-05	CLCF1	Down
ENSBTAG00000049435	-0.70863345	2.61188472	3.60E-06	8.87E-05	C21H14orf132	Down
ENSBTAG00000054495	-1.807983517	-0.397084383	4.01E-06	9.73E-05	ENSBTAG00000054495	Down
ENSBTAG00000011447	-1.172773095	1.025154751	5.74E-06	0.000132709	FAM171A2	Down
ENSBTAG00000054728	-0.990929793	1.343940829	6.05E-06	0.000138562	ENSBTAG00000054728	Down
ENSBTAG00000046957	-1.844753658	-0.542160117	6.14E-06	0.000140396	DOK6	Down
ENSBTAG00000021252	-1.014485473	1.741475164	6.20E-06	0.000141424	TMEM35A	Down
ENSBTAG00000012348	-0.867188559	2.187035082	7.25E-06	0.000162635	LRRC71	Down
ENSBTAG00000051311	-1.033691113	1.517352083	7.26E-06	0.000162657	ENSBTAG00000051311	Down
ENSBTAG00000030599	-0.594768332	3.176570349	7.97E-06	0.000175631	SMOC1	Down
ENSBTAG00000039861	0.683784239	2.952768529	8.08E-06	0.000176712	OAS1Y	Up
ENSBTAG00000008026	-1.508322416	-0.13466693	8.90E-06	0.000192701	OXT	Down
ENSBTAG00000030334	-0.907636317	1.680960312	1.01E-05	0.000217942	AOC2	Down
ENSBTAG00000039688	0.63082037	2.728647081	1.15E-05	0.00024098	RFLNA	Up
ENSBTAG00000008373	-1.17142095	1.245324096	1.19E-05	0.000248436	ITGA10	Down
ENSBTAG00000011956	1.112218767	1.078964462	1.49E-05	0.0003029	CNNM1	Up
ENSBTAG00000051775	-1.211892448	0.555774197	1.61E-05	0.000323882	ENSBTAG00000051775	Down
ENSBTAG00000015251	-0.719543057	2.301860408	2.01E-05	0.000386275	ENSBTAG00000015251	Down
ENSBTAG00000038889	-0.667397455	2.837666464	2.60E-05	0.000478815	RILP	Down
ENSBTAG00000037375	-0.606952202	2.871605946	2.69E-05	0.000490923	ENSBTAG00000037375	Down
ENSBTAG00000021991	-0.78691887	2.243404819	2.72E-05	0.000495452	TMEFF1	Down
ENSBTAG00000009800	-1.29757956	0.133477921	2.78E-05	0.000505669	MSI1	Down
ENSBTAG00000039594	-0.681572477	2.527957009	2.99E-05	0.000535291	ZNF862	Down
ENSBTAG00000027770	-1.394657118	-0.243286278	3.04E-05	0.000543438	ENSBTAG00000027770	Down
ENSBTAG00000013973	-1.76452867	-0.686799022	3.20E-05	0.000567389	SERPIND1	Down
ENSBTAG00000009643	-0.615616873	3.187256578	3.76E-05	0.00065099	ZBTB25	Down
ENSBTAG00000007372	-1.35728947	-0.168569024	4.26E-05	0.000725233	ANKRD61	Down
ENSBTAG00000049855	-1.258510694	0.067203732	4.64E-05	0.000778211	ENSBTAG00000049855	Down
ENSBTAG00000008739	-0.680209588	2.44890665	5.02E-05	0.000832273	SAMD11	Down
ENSBTAG00000009797	-1.222482585	0.478073592	5.40E-05	0.000886738	RIMBP2	Down
ENSBTAG00000000920	-0.769993509	2.202224112	5.63E-05	0.000916838	DNAH17	Down
ENSBTAG00000012182	0.863574644	1.732316057	5.80E-05	0.000939951	DIRAS3	Up
ENSBTAG00000049787	-1.184076761	0.196902088	6.41E-05	0.001019169	ENSBTAG00000049787	Down
ENSBTAG00000001937	1.131018027	0.681069839	6.50E-05	0.001028888	ANAPC11	Up
ENSBTAG00000020148	-0.967099148	1.217872863	6.70E-05	0.001052736	TEK	Down
ENSBTAG00000051596	-1.315484638	-0.017604197	6.93E-05	0.001082845	ENSBTAG00000051596	Down
ENSBTAG00000003054	-1.227056214	0.412224523	6.99E-05	0.001090253	INSRR	Down
ENSBTAG00000001514	-0.856472132	1.373599552	7.50E-05	0.001152364	ASB11	Down
ENSBTAG00000055174	-1.256724295	0.074561495	7.86E-05	0.00119296	ENSBTAG00000055174	Down
ENSBTAG00000019060	-0.635466124	2.566478577	7.86E-05	0.00119296	CLDN11	Down
ENSBTAG00000012074	-0.895121275	1.408743243	7.89E-05	0.001195956	MYB	Down
ENSBTAG00000009772	1.109935637	0.601502205	8.18E-05	0.00123157	LIX1	Up
ENSBTAG00000035544	-0.592392786	3.486037907	8.67E-05	0.001287512	CYP46A1	Down
ENSBTAG00000053620	-1.353023314	-0.359328453	8.74E-05	0.001295246	ENSBTAG00000053620	Down
ENSBTAG00000017242	-0.775837029	1.995062263	8.77E-05	0.001298278	FADS6	Down
ENSBTAG00000048857	-0.983485757	0.994890136	9.27E-05	0.001354277	ENSBTAG00000048857	Down
ENSBTAG00000054238	-0.965388089	1.039631252	9.63E-05	0.001395873	ENSBTAG00000054238	Down
ENSBTAG00000039815	-0.618641987	2.423968877	0.00010108	0.00145229	ZBTB6	Down
ENSBTAG00000005685	-1.009553187	1.034528616	0.000101829	0.001460351	HSD11B2	Down
ENSBTAG00000019093	-0.662702759	2.297015009	0.000106022	0.001507563	AMY2B	Down
ENSBTAG00000000601	-0.928929088	1.31513485	0.000109621	0.0015516	COL11A2	Down
ENSBTAG00000015309	0.748304613	1.890271126	0.000109801	0.001552384	CFAP300	Up
ENSBTAG00000053235	-1.320443814	-0.26172695	0.000113298	0.001594537	ENSBTAG00000053235	Down
ENSBTAG00000054302	-1.028418893	1.169308887	0.000116109	0.001624867	TCF23	Down
ENSBTAG00000018297	-0.729035917	2.256377794	0.000121249	0.00168349	PLEKHH1	Down
ENSBTAG00000004293	0.98744733	1.029751045	0.000122554	0.001697793	CLEC12B	Up
ENSBTAG00000019961	1.123901306	1.420171448	0.000129992	0.00177895	ATP4B	Up
ENSBTAG00000008176	-1.231948021	0.097025554	0.000133592	0.001816032	KCNRG	Down
ENSBTAG00000014707	1.073907502	1.923609024	0.000138964	0.001876848	ISG15	Up
ENSBTAG00000039929	-1.17046051	0.169052466	0.000139386	0.001880503	RXFP3	Down
ENSBTAG00000007835	-0.811236525	2.08312995	0.000149193	0.001982566	GPT	Down
ENSBTAG00000044073	1.318299295	0.423536738	0.00015005	0.001989687	CD248	Up
ENSBTAG00000021189	-0.858124795	1.184428156	0.000175899	0.002259861	ARHGAP36	Down
ENSBTAG00000016732	0.862265248	1.515541941	0.000178341	0.002281775	DNAI2	Up
ENSBTAG00000016963	-0.730311845	1.676859959	0.00019266	0.002422434	ADAMTS6	Down
ENSBTAG00000049557	-0.812928683	1.407351761	0.000205296	0.00256178	ENSBTAG00000049557	Down
ENSBTAG00000017200	1.005563013	1.137574758	0.000213924	0.002652104	RHOJ	Up
ENSBTAG00000012808	-0.728719399	1.783984315	0.000220355	0.002710131	MASP2	Down
ENSBTAG00000018031	-0.587357934	2.439749819	0.000220905	0.002711506	PODXL2	Down
ENSBTAG00000015235	-0.983886822	1.240381865	0.000230054	0.002804349	HMCN1	Down
ENSBTAG00000007485	-0.709680277	1.950521612	0.000236117	0.00286136	GRHL1	Down
ENSBTAG00000022886	-0.877411981	1.334828392	0.000247546	0.00298235	RYR2	Down
ENSBTAG00000019652	0.740197502	2.023065428	0.000249747	0.003005947	STK26	Up
ENSBTAG00000020219	-1.006234565	0.850509308	0.000256229	0.003065423	MSS51	Down
ENSBTAG00000049252	1.083646046	0.475911134	0.000263335	0.003126944	ENSBTAG00000049252	Up
ENSBTAG00000020745	-0.600333226	2.455157565	0.000270578	0.003206505	HIVEP3	Down
ENSBTAG00000010303	0.660350405	2.305225599	0.000272995	0.003220038	ICAM1	Up
ENSBTAG00000006630	-1.197314468	-0.160801705	0.000273338	0.003221024	SLC12A3	Down
ENSBTAG00000040331	-1.13267478	0.202438316	0.000281415	0.003300499	ENSBTAG00000040331	Down
ENSBTAG00000051419	0.874838098	1.522530427	0.000284744	0.003333225	ENSBTAG00000051419	Up
ENSBTAG00000019993	-1.007221044	0.494530667	0.00029689	0.003430024	APLN	Down
ENSBTAG00000052577	-1.21119109	-0.025744777	0.000319154	0.003636359	ENSBTAG00000052577	Down
ENSBTAG00000019591	-0.847124325	1.131234249	0.000320047	0.003639839	DCX	Down
ENSBTAG00000047828	-0.711624196	1.705340237	0.00032741	0.003699788	SHLD3	Down
ENSBTAG00000050527	-0.737683122	1.965785522	0.000342176	0.00384211	ENSBTAG00000050527	Down
ENSBTAG00000032140	-0.774205831	1.410871384	0.000342901	0.003846768	SBK1	Down
ENSBTAG00000001288	-0.820985451	1.46738005	0.00035148	0.003933219	MAOB	Down
ENSBTAG00000044046	-1.010251771	0.54473925	0.000382905	0.004192997	SGCD	Down
ENSBTAG00000052127	-1.218502046	-0.27222324	0.000416707	0.004476078	ENSBTAG00000052127	Down
ENSBTAG00000013774	-0.720744376	1.740904785	0.000421741	0.004518394	CCDC9B	Down
ENSBTAG00000009190	0.664012578	2.306281012	0.000423568	0.004530131	SLC2A4	Up
ENSBTAG00000051491	-0.629544451	2.428920416	0.000436651	0.004638016	ENSBTAG00000051491	Down
ENSBTAG00000051821	-0.745920557	1.464880047	0.000440872	0.004674824	ENSBTAG00000051821	Down
ENSBTAG00000009219	1.172151493	0.020373598	0.000444388	0.004700039	CADM2	Up
ENSBTAG00000017785	-1.139569554	0.26953405	0.000446127	0.00471394	FRMPD4	Down
ENSBTAG00000016043	-0.905551603	1.085323034	0.000453279	0.00476559	GNB3	Down
ENSBTAG00000015792	-0.628689509	2.072884876	0.000468763	0.0049034	CFAP54	Down
ENSBTAG00000008008	0.701034494	2.060948361	0.000482345	0.005036968	TLR2	Up
ENSBTAG00000010888	-0.695382046	1.780409396	0.00050663	0.005244686	VSIR	Down
ENSBTAG00000006784	-0.813687285	1.191557887	0.000508368	0.005251725	PLA2G4B	Down
ENSBTAG00000049946	-1.105432214	0.422210514	0.000516229	0.005310212	ENSBTAG00000049946	Down
ENSBTAG00000016534	-0.930763546	1.066559965	0.000520385	0.005348521	BCL11A	Down
ENSBTAG00000004685	-0.717660948	1.927747803	0.000538165	0.005498957	SRGAP3	Down
ENSBTAG00000033429	0.585502459	2.313511312	0.000556552	0.005650662	FAM229B	Up
ENSBTAG00000003447	-0.679508549	1.991606891	0.000578897	0.005832744	ENSBTAG00000003447	Down
ENSBTAG00000039283	-1.232153581	-0.262269033	0.000596272	0.005969946	ENSBTAG00000039283	Down
ENSBTAG00000014420	-1.137455535	0.131802796	0.00060483	0.006046539	AGER	Down
ENSBTAG00000014782	-0.72859119	2.082255571	0.000627926	0.006226474	STAB1	Down
ENSBTAG00000008981	-0.800564025	1.082763611	0.000638285	0.00630343	USP49	Down
ENSBTAG00000054870	0.914070979	0.769668896	0.000674175	0.006606231	ENSBTAG00000054870	Up
ENSBTAG00000054948	-0.650668606	1.872874556	0.000689799	0.006737511	ENSBTAG00000054948	Down
ENSBTAG00000014762	-0.59801575	2.390913746	0.000696969	0.006796818	ISG20	Down
ENSBTAG00000050438	0.854915348	0.887015954	0.000698725	0.006808581	ENSBTAG00000050438	Up
ENSBTAG00000053910	-0.674078029	1.925921175	0.000714236	0.006919944	C17orf58	Down
ENSBTAG00000017879	0.866518437	0.917089018	0.000716985	0.006931971	C9H6orf163	Up
ENSBTAG00000005471	-1.191203561	-0.420974735	0.000720131	0.006956963	RHCG	Down
ENSBTAG00000005638	-0.65893175	1.923196325	0.000736703	0.007072919	CABYR	Down
ENSBTAG00000018105	-0.586656976	2.453101691	0.000768032	0.007287908	ACVR2B	Down
ENSBTAG00000015086	-0.768913737	1.497902271	0.000780718	0.007381065	HSD11B1	Down
ENSBTAG00000011818	0.82557979	1.033392345	0.000785404	0.007408395	COL26A1	Up
ENSBTAG00000048415	-1.130970454	0.103042408	0.000794004	0.007455453	GPR142	Down
ENSBTAG00000054127	-0.815512417	1.021578288	0.000811845	0.007572514	ENSBTAG00000054127	Down
ENSBTAG00000039794	-0.678874247	1.832719154	0.000828911	0.007707255	CSNK1B	Down
ENSBTAG00000052562	-1.250402702	0.556537145	0.000835704	0.007747149	ID4	Down
ENSBTAG00000020205	-0.690204313	1.59084406	0.000884103	0.008063044	ENSBTAG00000020205	Down
ENSBTAG00000000658	-1.009767095	0.449427063	0.000896046	0.008136863	WDR97	Down
ENSBTAG00000037949	1.108781878	-0.032701348	0.00091499	0.00827164	GSTA5	Up
ENSBTAG00000048982	-0.913209882	1.158706508	0.000940332	0.008451387	ENSBTAG00000048982	Down
ENSBTAG00000000560	-1.200912224	-0.232305851	0.000959228	0.008596267	ENSBTAG00000000560	Down
ENSBTAG00000012693	-0.989073473	0.62145995	0.000961922	0.008613221	ENSBTAG00000012693	Down
ENSBTAG00000019075	0.627444718	2.085025045	0.000977303	0.008726675	METAP1D	Up
ENSBTAG00000009994	-0.674100672	1.716951915	0.001068279	0.009396758	EML5	Down
ENSBTAG00000013976	-0.830066421	0.925327786	0.00115679	0.010018775	AGBL3	Down
ENSBTAG00000012100	-1.179429817	-0.159889395	0.001170882	0.010126661	PDE1A	Down
ENSBTAG00000037566	-0.704868158	1.588727691	0.001206244	0.010331005	ZNF500	Down
ENSBTAG00000001414	-0.744558621	1.492442619	0.001209884	0.010348349	KCTD12	Down
ENSBTAG00000046328	0.725079743	1.377476982	0.001234064	0.010518847	XG	Up
ENSBTAG00000014026	-0.638660939	1.789779096	0.001309603	0.011011157	PAG1	Down
ENSBTAG00000021302	-0.825948555	0.681314132	0.00131297	0.011024497	CHAD	Down
ENSBTAG00000024555	-0.898119498	0.505787417	0.001424336	0.01181541	EFCAB2	Down
ENSBTAG00000027625	-0.655077685	1.831949801	0.001438609	0.011909876	SFRP1	Down
ENSBTAG00000000782	-1.053392358	-0.018750397	0.001465795	0.012078423	KDR	Down
ENSBTAG00000025140	-1.077882258	-0.290115167	0.001538225	0.012541752	DOC2B	Down
ENSBTAG00000053998	-0.762690647	1.34318488	0.001574037	0.012741467	ENSBTAG00000053998	Down
ENSBTAG00000030710	0.669208265	1.597043057	0.001612191	0.012973997	ITGB3BP	Up
ENSBTAG00000032617	-0.769339806	1.211314886	0.001673887	0.013331894	FBXO44	Down
ENSBTAG00000034366	-0.760777909	1.298220523	0.001847149	0.014415209	ENSBTAG00000034366	Down
ENSBTAG00000014459	-0.730894226	1.076295834	0.00185509	0.01445896	MAP6D1	Down
ENSBTAG00000009714	-0.687449536	1.40536437	0.001874068	0.014588517	ARHGAP33	Down
ENSBTAG00000019545	-1.018412487	-0.225287549	0.001922119	0.014869106	ENSBTAG00000019545	Down
ENSBTAG00000030932	0.957485889	0.103943735	0.002055834	0.015663688	IFI44L	Up
ENSBTAG00000001481	-0.828378622	0.710887434	0.002130756	0.01611075	IGSF9	Down
ENSBTAG00000009649	0.944069577	0.172753437	0.002209611	0.01656433	DRC1	Up
ENSBTAG00000010548	-0.704486127	1.385077989	0.002273273	0.016929937	LRRC6	Down
ENSBTAG00000017056	-0.693699567	1.426423578	0.0023545	0.017419642	PKLR	Down
ENSBTAG00000053271	-1.02169782	-0.01751914	0.002373092	0.01750842	ENSBTAG00000053271	Down
ENSBTAG00000023369	-0.88462645	0.315622229	0.002373168	0.01750842	GRIN2D	Down
ENSBTAG00000045509	0.638250641	1.713522272	0.002437979	0.017866488	FAM217B	Up
ENSBTAG00000021501	-0.696823595	2.363412101	0.002443425	0.017895809	ENSBTAG00000021501	Down
ENSBTAG00000003776	-1.016165283	0.012856381	0.002461778	0.018008928	MSANTD1	Down
ENSBTAG00000020059	-0.599655629	2.268740831	0.002547198	0.018567849	GEN1	Down
ENSBTAG00000054331	-0.801382641	0.889664905	0.002567939	0.018686204	COLEC10	Down
ENSBTAG00000016279	1.058504106	-0.13548265	0.002641502	0.019075806	EMILIN3	Up
ENSBTAG00000014103	-0.726667139	0.986737192	0.002774523	0.019759899	SH3GL2	Down
ENSBTAG00000020416	-0.635478598	2.265533005	0.002855312	0.020195908	PGAP1	Down
ENSBTAG00000040063	-0.620431098	1.954483366	0.002883064	0.02033414	ENSBTAG00000040063	Down
ENSBTAG00000016388	-1.02166797	-0.232271733	0.002946822	0.020677841	SLCO4A1	Down
ENSBTAG00000037650	0.775941354	0.945947117	0.0029729	0.020790156	RTL9	Up
ENSBTAG00000006894	0.945678096	0.161463113	0.003098291	0.021521223	NOS2	Up
ENSBTAG00000007334	-0.704743393	1.426831558	0.003147418	0.021813529	NFKBID	Down
ENSBTAG00000018347	-0.958682332	0.842451721	0.003155347	0.021844029	IL33	Down
ENSBTAG00000008428	1.122510844	-0.064170144	0.003177876	0.021925095	UPP1	Up
ENSBTAG00000015164	-0.961241956	0.485334901	0.003285613	0.022544221	SLC27A5	Down
ENSBTAG00000023970	0.987017984	0.301640022	0.003384662	0.02313007	ENSBTAG00000023970	Up
ENSBTAG00000021992	-0.674933885	1.206193236	0.00341997	0.023272706	CAVIN4	Down
ENSBTAG00000003665	-1.066801351	-0.50895761	0.00342622	0.023302436	NUP210	Down
ENSBTAG00000003601	-0.915615758	0.111027037	0.003439221	0.023365195	ZMAT1	Down
ENSBTAG00000022622	-0.893957004	0.418616795	0.003450906	0.023412047	CISH	Down
ENSBTAG00000010107	-0.651516019	1.277632555	0.003653754	0.024467432	WHRN	Down
ENSBTAG00000040360	-0.937975917	-0.180828073	0.003669127	0.024548183	CCDC166	Down
ENSBTAG00000049130	0.852651222	0.479222278	0.003723329	0.024805505	ENSBTAG00000049130	Up
ENSBTAG00000051726	0.749910521	0.96281084	0.003770416	0.025065275	ENSBTAG00000051726	Up
ENSBTAG00000003751	-0.909920924	0.195644134	0.003845332	0.025403351	MACC1	Down
ENSBTAG00000054639	-0.742158633	0.877712018	0.003868186	0.025482701	ENSBTAG00000054639	Down
ENSBTAG00000052987	-0.67740694	2.748875946	0.004067965	0.026488828	ENSBTAG00000052987	Down
ENSBTAG00000010531	-0.894092874	0.83020659	0.004097502	0.026556601	CYP1B1	Down
ENSBTAG00000049552	-0.931509667	0.00445804	0.00413109	0.026633811	ENSBTAG00000049552	Down
ENSBTAG00000049676	-0.83414143	0.784715075	0.004188075	0.026903167	ENSBTAG00000049676	Down
ENSBTAG00000049995	-1.095145827	-0.553861481	0.004428076	0.028196256	ENSBTAG00000049995	Down
ENSBTAG00000039922	-0.951061821	-0.101837357	0.004542912	0.028662235	ARAP2	Down
ENSBTAG00000024021	-0.904426501	0.117631817	0.004733437	0.029548191	NRXN1	Down
ENSBTAG00000033749	-0.807812366	0.410851971	0.004810292	0.029937417	ENSBTAG00000033749	Down
ENSBTAG00000027426	0.703604553	1.784514225	0.004824054	0.029977879	ENSBTAG00000027426	Up
ENSBTAG00000015341	-0.609831663	1.484754838	0.005249823	0.031966105	DEPTOR	Down
ENSBTAG00000018575	0.789279387	0.47913651	0.005365166	0.032476825	TRHDE	Up
ENSBTAG00000037964	-0.875006133	0.050506378	0.005441365	0.032809787	H2AW	Down
ENSBTAG00000027425	0.629963667	1.678994633	0.005452648	0.032845839	CCDC190	Up
ENSBTAG00000038700	0.851337489	0.433063712	0.005607689	0.03355132	FAM124B	Up
ENSBTAG00000011655	-0.887621848	0.082067567	0.005719239	0.034005174	SAMD10	Down
ENSBTAG00000051719	-0.783804033	0.479763191	0.005730938	0.034058381	ENSBTAG00000051719	Down
ENSBTAG00000015551	0.778587113	1.245124033	0.005847544	0.034701406	ENSBTAG00000015551	Up
ENSBTAG00000019473	-0.923039382	-0.125760963	0.006002369	0.035349187	IGLON5	Down
ENSBTAG00000048996	-0.663232026	1.063526747	0.006203463	0.036138235	ENSBTAG00000048996	Down
ENSBTAG00000014012	0.798358723	0.306893664	0.006584031	0.037839081	CLUL1	Up
ENSBTAG00000006031	-0.833044367	0.66152567	0.00678256	0.038710603	ADGRV1	Down
ENSBTAG00000047643	0.763321115	1.076536016	0.00718832	0.040577641	C27H8orf48	Up
ENSBTAG00000013942	-0.655009953	1.232983826	0.007287641	0.041007469	DAGLA	Down
ENSBTAG00000011910	0.819097727	0.435299205	0.007662426	0.042632142	STK33	Up
ENSBTAG00000025803	-0.805005584	0.404847952	0.007720123	0.042895346	INSYN1	Down
ENSBTAG00000039601	-0.960324212	-0.252454288	0.00811634	0.044675944	SAP25	Down
ENSBTAG00000034384	0.836659445	0.16063299	0.008288848	0.04544373	VWA3B	Up
ENSBTAG00000016603	-0.790270459	0.188844795	0.008451032	0.046088083	ENSBTAG00000016603	Down
ENSBTAG00000009686	0.613838195	1.145618974	0.008494253	0.046262677	FBXO15	Up
ENSBTAG00000021286	-0.80857081	0.429370357	0.008516035	0.046360918	SLC37A1	Down
ENSBTAG00000039571	-0.654484708	1.024130573	0.008739793	0.047267199	PROSER2	Down
ENSBTAG00000020032	0.719921369	0.808987546	0.008837803	0.047589648	CEP126	Up
ENSBTAG00000009065	-0.765994038	0.332614118	0.009066002	0.048502134	MAP3K5	Down
ENSBTAG00000012681	-0.850565577	-0.043484924	0.009241459	0.049206997	CORO2B	Down
ENSBTAG00000013066	-0.9751319	0.196603834	0.009364299	0.049754117	IGF2	Down
