# Supplementary material for: Transcriptome Reveals Granulosa Cells Coping through Redox, Inflammatory and Metabolic Mechanisms under Acute Heat Stress
Source: Cells. 2022 Apr 25;11(9):1443. doi: 10.3390/cells11091443 (PMC9105522; doi:10.3390/cells11091443)
Supplement: Supplementary file 1 [file cells-11-01443-s001.zip › Supplementary Table S4.csv]

Supplementary Table S4: Kyoto encyclopedia of genes and genomes (KEGG) based pathway analysis of differentially expressed genes (DEGs) in response to heat stress granulosa cells. All the significantly (p < 0.05) regulated pathways and DEGs enrichment ratios are illustrated.
ID	Description	GeneRatio	BgRatio	pvalue	p.adjust	qvalue	geneID	Count	gene name
bta04610	Complement and coagulation cascades	6/124	93/9004	0.001734619	0.138937267	0.131185402	505819/100125764/540702/112441462/781663/517356	6	MASP2/SERPIND1/C3AR1/SERPINA5/LOC781663/C8G
bta00350	Tyrosine metabolism	4/124	39/9004	0.001941716	0.138937267	0.131185402	338445/510551/338074/100336082	4	MAOB/ADH6/AOX1/AOC2
bta04926	Relaxin signaling pathway	7/124	131/9004	0.002159556	0.138937267	0.131185402	281572/282876/515610/513340/510708/281870/539509	7	VEGFA/NOS2/ACTA2/GNB3/ADCY2/INSL3/RXFP3
bta05414	Dilated cardiomyopathy	6/124	99/9004	0.002385189	0.138937267	0.131185402	327703/518117/506526/510708/537376/517059	6	CACNB1/ATP2A1/ITGA10/ADCY2/RYR2/SGCD
bta05412	Arrhythmogenic right ventricular cardiomyopathy	5/124	76/9004	0.0038707	0.180374638	0.170310817	327703/518117/506526/537376/517059	5	CACNB1/ATP2A1/ITGA10/RYR2/SGCD
bta04921	Oxytocin signaling pathway	7/124	153/9004	0.005117085	0.198713484	0.187626466	327703/505485/280888/107131237/510708/537376/100848920	7	CACNB1/PLA2G4B/OXT/PPP1R12B/ADCY2/RYR2/RGS2
bta05032	Morphine addiction	5/124	92/9004	0.00866052	0.224302066	0.211787359	281969/513340/513785/510708/107131388	5	PDE1A/GNB3/GABBR1/ADCY2/PDE8B
bta05410	Hypertrophic cardiomyopathy	5/124	92/9004	0.00866052	0.224302066	0.211787359	327703/518117/506526/537376/517059	5	CACNB1/ATP2A1/ITGA10/RYR2/SGCD
bta04350	TGF-beta signaling pathway	5/124	93/9004	0.009054037	0.224302066	0.211787359	511279/509942/282131/539079/100848012	5	SMAD6/CHRD/ACVR2B/GREM1/ID4
bta00982	Drug metabolism - cytochrome P450	4/124	62/9004	0.010335959	0.224302066	0.211787359	338445/510551/338074/521685	4	MAOB/ADH6/AOX1/GSTA5
bta04360	Axon guidance	7/124	179/9004	0.011705029	0.224302066	0.211787359	407770/512892/524942/407104/100139818/516019/787961	7	PLXNA2/SRGAP3/UNC5B/PLXNA4/EFNB2/SEMA6A/NTN3
bta04371	Apelin signaling pathway	6/124	141/9004	0.013099357	0.224302066	0.211787359	282876/515610/513340/510708/282143/537376	6	NOS2/ACTA2/GNB3/ADCY2/APLN/RYR2
bta04972	Pancreatic secretion	5/124	102/9004	0.013165263	0.224302066	0.211787359	518117/505049/510708/784768/537376	5	ATP2A1/AMY2B/ADCY2/LOC784768/RYR2
bta00980	Metabolism of xenobiotics by cytochrome P450	4/124	67/9004	0.013477377	0.224302066	0.211787359	510551/511470/282589/521685	4	ADH6/CYP1B1/HSD11B1/GSTA5
bta05418	Fluid shear stress and atherosclerosis	6/124	145/9004	0.014870094	0.230982128	0.218094713	407170/281572/537380/281839/282131/521685	6	KDR/VEGFA/MAP3K5/ICAM1/ACVR2B/GSTA5
bta00120	Primary bile acid biosynthesis	2/124	17/9004	0.022354312	0.307677066	0.290510534	533016/506438	2	SLC27A5/CYP46A1
bta04020	Calcium signaling pathway	8/124	252/9004	0.022898649	0.307677066	0.290510534	407170/281572/518117/282876/281969/510708/537376/618181	8	KDR/VEGFA/ATP2A1/NOS2/PDE1A/ADCY2/RYR2/GRIN2D
bta00260	Glycine, serine and threonine metabolism	3/124	45/9004	0.023769044	0.307677066	0.290510534	338445/280719/100336082	3	MAOB/AMT/AOC2
bta04742	Taste transduction	4/124	83/9004	0.027350398	0.312081323	0.29466906	533065/281969/513340/513785	4	SCN9A/PDE1A/GNB3/GABBR1
bta00380	Tryptophan metabolism	3/124	48/9004	0.028127501	0.312081323	0.29466906	338445/338074/511470	3	MAOB/AOX1/CYP1B1
bta05030	Cocaine addiction	3/124	48/9004	0.028127501	0.312081323	0.29466906	338445/281453/618181	3	MAOB/RGS9/GRIN2D
bta00220	Arginine biosynthesis	2/124	20/9004	0.030405718	0.322024195	0.30405718	282876/539188	2	NOS2/GPT
bta00360	Phenylalanine metabolism	2/124	24/9004	0.042626271	0.431822663	0.407729553	338445/100336082	2	MAOB/AOC2
bta04370	VEGF signaling pathway	3/124	58/9004	0.045489008	0.439282837	0.414773494	407170/281572/505485	3	KDR/VEGFA/PLA2G4B
