# Supplementary material for: Transcriptome Reveals Granulosa Cells Coping through Redox, Inflammatory and Metabolic Mechanisms under Acute Heat Stress
Source: Cells. 2022 Apr 25;11(9):1443. doi: 10.3390/cells11091443 (PMC9105522; doi:10.3390/cells11091443)
Supplement: Supplementary file 1 [file cells-11-01443-s001.zip › Supplementary Table S5.csv]

Supplementary Table S5: Detailed annotation of gene ontology (GO) terms (p > 0.05) of significant differentially expressed genes in control versus acute heat stress treatment groups. GO terms including biological process (BP), cellular components (CC), and molecular functions (MF) enrichment ratios are given.
ONTOLOGY	ID	Description	GeneRatio	BgRatio	pvalue	p.adjust	qvalue	geneID	Count	gene symbol
BP	GO:0150117	positive regulation of cell-substrate junction organization	Mar-52	3-Oct	0.000164667	0.058725916	0.056320618	281572/280939/282068	3	VEGFA/TEK/SFRP1
BP	GO:0001954	positive regulation of cell-matrix adhesion	Mar-52	3-Nov	0.000224573	0.058725916	0.056320618	281572/280939/282068	3	VEGFA/TEK/SFRP1
BP	GO:0051893	regulation of focal adhesion assembly	Mar-52	3-Nov	0.000224573	0.058725916	0.056320618	281572/280939/282068	3	VEGFA/TEK/SFRP1
BP	GO:0090109	regulation of cell-substrate junction assembly	Mar-52	3-Nov	0.000224573	0.058725916	0.056320618	281572/280939/282068	3	VEGFA/TEK/SFRP1
BP	GO:0048041	focal adhesion assembly	Mar-52	13/4503	0.000382949	0.072237337	0.069278637	281572/280939/282068	3	VEGFA/TEK/SFRP1
BP	GO:0007044	cell-substrate junction assembly	Mar-52	14/4503	0.000483424	0.072237337	0.069278637	281572/280939/282068	3	VEGFA/TEK/SFRP1
BP	GO:0150116	regulation of cell-substrate junction organization	Mar-52	14/4503	0.000483424	0.072237337	0.069278637	281572/280939/282068	3	VEGFA/TEK/SFRP1
BP	GO:0043550	regulation of lipid kinase activity	Mar-52	15/4503	0.000599365	0.07836703	0.075157271	280939/515233/616753	3	TEK/EEF1A2/CISH
BP	GO:0150115	cell-substrate junction organization	Mar-52	17/4503	0.000881253	0.102421172	0.098226202	281572/280939/282068	3	VEGFA/TEK/SFRP1
BP	GO:0001952	regulation of cell-matrix adhesion	Mar-52	18/4503	0.001048913	0.109716328	0.105222563	281572/280939/282068	3	VEGFA/TEK/SFRP1
BP	GO:0010811	positive regulation of cell-substrate adhesion	Mar-52	19/4503	0.00123547	0.11748201	0.112670177	281572/280939/282068	3	VEGFA/TEK/SFRP1
BP	GO:1901890	positive regulation of cell junction assembly	Mar-52	20/4503	0.001441697	0.125667928	0.120520817	281572/280939/282068	3	VEGFA/TEK/SFRP1
BP	GO:0007389	pattern specification process	Apr-52	54/4503	0.003266428	0.262821841	0.252057174	509524/527979/282068/516209	4	DRC1/LRRC6/SFRP1/LFNG
BP	GO:0007160	cell-matrix adhesion	Mar-52	28/4503	0.003881941	0.290036426	0.278157104	281572/280939/282068	3	VEGFA/TEK/SFRP1
BP	GO:0010810	regulation of cell-substrate adhesion	Mar-52	30/4503	0.004733468	0.302077685	0.289705177	281572/280939/282068	3	VEGFA/TEK/SFRP1
BP	GO:0001539	cilium or flagellum-dependent cell motility	Mar-52	31/4503	0.005198278	0.302077685	0.289705177	617472/509524/527979	3	CATSPERD/DRC1/LRRC6
BP	GO:0060285	cilium-dependent cell motility	Mar-52	31/4503	0.005198278	0.302077685	0.289705177	617472/509524/527979	3	CATSPERD/DRC1/LRRC6
BP	GO:1901888	regulation of cell junction assembly	Mar-52	31/4503	0.005198278	0.302077685	0.289705177	281572/280939/282068	3	VEGFA/TEK/SFRP1
BP	GO:0010634	positive regulation of epithelial cell migration	Mar-52	34/4503	0.006753973	0.371824001	0.356594821	281572/280939/281870	3	VEGFA/TEK/INSL3
BP	GO:0030098	lymphocyte differentiation	Apr-52	69/4503	0.007863377	0.38119667	0.365583604	506206/282713/282068/516209	4	MR1/NFKBIZ/SFRP1/LFNG
BP	GO:0035282	segmentation	Feb-52	3-Dec	0.008017521	0.38119667	0.365583604	282068/516209	2	SFRP1/LFNG
BP	GO:0043551	regulation of phosphatidylinositol 3-kinase activity	Feb-52	3-Dec	0.008017521	0.38119667	0.365583604	280939/616753	2	TEK/CISH
BP	GO:0032970	regulation of actin filament-based process	Apr-52	72/4503	0.00912335	0.397626008	0.381340028	327676/518117/280939/282068	4	ARHGDIB/ATP2A1/TEK/SFRP1
BP	GO:0090130	tissue migration	Apr-52	72/4503	0.00912335	0.397626008	0.381340028	281572/515610/280939/281870	4	VEGFA/ACTA2/TEK/INSL3
BP	GO:0051240	positive regulation of multicellular organismal process	Aug-52	264/4503	0.009935781	0.415713084	0.398686293	281572/518117/282876/280888/282713/281871/282143/280939	8	VEGFA/ATP2A1/NOS2/OXT/NFKBIZ/ISG15/APLN/TEK
BP	GO:1903131	mononuclear cell differentiation	Apr-52	78/4503	0.012024556	0.466076749	0.446987161	506206/282713/282068/516209	4	MR1/NFKBIZ/SFRP1/LFNG
BP	GO:0007368	determination of left/right symmetry	Feb-52	15/4503	0.012476242	0.466076749	0.446987161	509524/527979	2	DRC1/LRRC6
BP	GO:0018198	peptidyl-cysteine modification	Feb-52	15/4503	0.012476242	0.466076749	0.446987161	282876/614904	2	NOS2/MAP6D1
BP	GO:0031589	cell-substrate adhesion	Mar-52	44/4503	0.013787245	0.493504051	0.473291094	281572/280939/282068	3	VEGFA/TEK/SFRP1
BP	GO:0009855	determination of bilateral symmetry	Feb-52	16/4503	0.014154036	0.493504051	0.473291094	509524/527979	2	DRC1/LRRC6
BP	GO:0045785	positive regulation of cell adhesion	Apr-52	83/4503	0.014851202	0.498831912	0.478400737	281572/282713/280939/282068	4	VEGFA/NFKBIZ/TEK/SFRP1
BP	GO:0009799	specification of symmetry	Feb-52	17/4503	0.01592374	0.498831912	0.478400737	509524/527979	2	DRC1/LRRC6
BP	GO:0034446	substrate adhesion-dependent cell spreading	Feb-52	17/4503	0.01592374	0.498831912	0.478400737	280939/282068	2	TEK/SFRP1
BP	GO:0035023	regulation of Rho protein signal transduction	Feb-52	18/4503	0.017783094	0.498831912	0.478400737	327676/528386	2	ARHGDIB/CAVIN4
BP	GO:0031532	actin cytoskeleton reorganization	Feb-52	19/4503	0.019729873	0.498831912	0.478400737	327676/280939	2	ARHGDIB/TEK
BP	GO:0035082	axoneme assembly	Feb-52	19/4503	0.019729873	0.498831912	0.478400737	509524/527979	2	DRC1/LRRC6
BP	GO:0030029	actin filament-based process	May-52	139/4503	0.021176391	0.498831912	0.478400737	327676/518117/515610/280939/282068	5	ARHGDIB/ATP2A1/ACTA2/TEK/SFRP1
BP	GO:0043549	regulation of kinase activity	May-52	139/4503	0.021176391	0.498831912	0.478400737	281240/280939/515233/616753/282068	5	IGF2/TEK/EEF1A2/CISH/SFRP1
BP	GO:0071456	cellular response to hypoxia	Feb-52	20/4503	0.021761892	0.498831912	0.478400737	281572/282068	2	VEGFA/SFRP1
BP	GO:0051239	regulation of multicellular organismal process	Nov-52	494/4503	0.022976639	0.498831912	0.478400737	281572/518117/282876/281534/280888/282713/281871/282143/280939/281870/282068	11	VEGFA/ATP2A1/NOS2/TLR2/OXT/NFKBIZ/ISG15/APLN/TEK/INSL3/SFRP1
BP	GO:0018193	peptidyl-amino acid modification	Jul-52	249/4503	0.02304208	0.498831912	0.478400737	281572/282876/527479/614904/280939/282068/785423	7	VEGFA/NOS2/AGBL3/MAP6D1/TEK/SFRP1/CSNK1B
BP	GO:0010632	regulation of epithelial cell migration	Mar-52	54/4503	0.023824529	0.498831912	0.478400737	281572/280939/281870	3	VEGFA/TEK/INSL3
BP	GO:0030217	T cell differentiation	Mar-52	54/4503	0.023824529	0.498831912	0.478400737	506206/282713/516209	3	MR1/NFKBIZ/LFNG
BP	GO:0009952	anterior/posterior pattern specification	Feb-52	21/4503	0.023877004	0.498831912	0.478400737	282068/516209	2	SFRP1/LFNG
BP	GO:0030183	B cell differentiation	Feb-52	21/4503	0.023877004	0.498831912	0.478400737	282068/516209	2	SFRP1/LFNG
BP	GO:0035148	tube formation	Feb-52	21/4503	0.023877004	0.498831912	0.478400737	281572/282068	2	VEGFA/SFRP1
BP	GO:0036294	cellular response to decreased oxygen levels	Feb-52	21/4503	0.023877004	0.498831912	0.478400737	281572/282068	2	VEGFA/SFRP1
BP	GO:0045765	regulation of angiogenesis	Mar-52	55/4503	0.024997511	0.498831912	0.478400737	281572/280939/282068	3	VEGFA/TEK/SFRP1
BP	GO:0043009	chordate embryonic development	Apr-52	98/4503	0.025732883	0.498831912	0.478400737	281240/515553/282068/516209	4	IGF2/SLC25A34/SFRP1/LFNG
BP	GO:0048646	anatomical structure formation involved in morphogenesis	Jun-52	199/4503	0.025856198	0.498831912	0.478400737	281572/515610/282143/280939/282068/516209	6	VEGFA/ACTA2/APLN/TEK/SFRP1/LFNG
BP	GO:0018108	peptidyl-tyrosine phosphorylation	Mar-52	56/4503	0.026201346	0.498831912	0.478400737	281572/280939/282068	3	VEGFA/TEK/SFRP1
BP	GO:0018212	peptidyl-tyrosine modification	Mar-52	57/4503	0.027436013	0.498831912	0.478400737	281572/280939/282068	3	VEGFA/TEK/SFRP1
BP	GO:1901342	regulation of vasculature development	Mar-52	57/4503	0.027436013	0.498831912	0.478400737	281572/280939/282068	3	VEGFA/TEK/SFRP1
BP	GO:0044089	positive regulation of cellular component biogenesis	Apr-52	100/4503	0.027468762	0.498831912	0.478400737	281572/281871/280939/282068	4	VEGFA/ISG15/TEK/SFRP1
BP	GO:0001568	blood vessel development	May-52	150/4503	0.028341839	0.498831912	0.478400737	281572/515610/282143/280939/282068	5	VEGFA/ACTA2/APLN/TEK/SFRP1
BP	GO:0010595	positive regulation of endothelial cell migration	Feb-52	23/4503	0.028348092	0.498831912	0.478400737	281572/280939	2	VEGFA/TEK
BP	GO:0009792	embryo development ending in birth or egg hatching	Apr-52	101/4503	0.028362558	0.498831912	0.478400737	281240/515553/282068/516209	4	IGF2/SLC25A34/SFRP1/LFNG
BP	GO:0034329	cell junction assembly	Mar-52	58/4503	0.028701473	0.498831912	0.478400737	281572/280939/282068	3	VEGFA/TEK/SFRP1
BP	GO:0072359	circulatory system development	Jun-52	204/4503	0.028778346	0.498831912	0.478400737	281572/509524/515610/282143/280939/282068	6	VEGFA/DRC1/ACTA2/APLN/TEK/SFRP1
BP	GO:0002521	leukocyte differentiation	Apr-52	102/4503	0.02927367	0.498831912	0.478400737	506206/282713/282068/516209	4	MR1/NFKBIZ/SFRP1/LFNG
BP	GO:0051493	regulation of cytoskeleton organization	Apr-52	102/4503	0.02927367	0.498831912	0.478400737	327676/614904/280939/282068	4	ARHGDIB/MAP6D1/TEK/SFRP1
BP	GO:0002821	positive regulation of adaptive immune response	Feb-52	24/4503	0.030699952	0.498831912	0.478400737	506206/282713	2	MR1/NFKBIZ
BP	GO:0007010	cytoskeleton organization	Jul-52	266/4503	0.031662469	0.498831912	0.478400737	327676/509524/527979/614904/515610/280939/282068	7	ARHGDIB/DRC1/LRRC6/MAP6D1/ACTA2/TEK/SFRP1
BP	GO:0001944	vasculature development	May-52	155/4503	0.032055711	0.498831912	0.478400737	281572/515610/282143/280939/282068	5	VEGFA/ACTA2/APLN/TEK/SFRP1
BP	GO:0051272	positive regulation of cellular component movement	Apr-52	105/4503	0.032111432	0.498831912	0.478400737	281572/518117/280939/281870	4	VEGFA/ATP2A1/TEK/INSL3
BP	GO:0007266	Rho protein signal transduction	Feb-52	25/4503	0.033126671	0.498831912	0.478400737	327676/528386	2	ARHGDIB/CAVIN4
BP	GO:0030278	regulation of ossification	Feb-52	25/4503	0.033126671	0.498831912	0.478400737	281871/282068	2	ISG15/SFRP1
BP	GO:0009790	embryo development	May-52	159/4503	0.035238782	0.498831912	0.478400737	281240/515553/282143/282068/516209	5	IGF2/SLC25A34/APLN/SFRP1/LFNG
BP	GO:0007517	muscle organ development	Mar-52	63/4503	0.035488624	0.498831912	0.478400737	515610/528386/616841	3	ACTA2/CAVIN4/TCF23
BP	GO:0001578	microtubule bundle formation	Feb-52	26/4503	0.035626279	0.498831912	0.478400737	509524/527979	2	DRC1/LRRC6
BP	GO:0030317	flagellated sperm motility	Feb-52	26/4503	0.035626279	0.498831912	0.478400737	617472/527979	2	CATSPERD/LRRC6
BP	GO:0097722	sperm motility	Feb-52	26/4503	0.035626279	0.498831912	0.478400737	617472/527979	2	CATSPERD/LRRC6
BP	GO:0030097	hemopoiesis	May-52	160/4503	0.036064363	0.498831912	0.478400737	506206/282713/281871/282068/516209	5	MR1/NFKBIZ/ISG15/SFRP1/LFNG
BP	GO:0051781	positive regulation of cell division	Feb-52	27/4503	0.038196838	0.498831912	0.478400737	281572/281240	2	VEGFA/IGF2
BP	GO:0032956	regulation of actin cytoskeleton organization	Mar-52	65/4503	0.03841651	0.498831912	0.478400737	327676/280939/282068	3	ARHGDIB/TEK/SFRP1
BP	GO:0061061	muscle structure development	Apr-52	112/4503	0.039347254	0.498831912	0.478400737	281240/515610/528386/616841	4	IGF2/ACTA2/CAVIN4/TCF23
BP	GO:0051338	regulation of transferase activity	May-52	164/4503	0.0394871	0.498831912	0.478400737	281240/280939/515233/616753/282068	5	IGF2/TEK/EEF1A2/CISH/SFRP1
BP	GO:0006928	movement of cell or subcellular component	Aug-52	341/4503	0.039842676	0.498831912	0.478400737	617472/281572/518117/509524/527979/280939/281870/282068	8	CATSPERD/VEGFA/ATP2A1/DRC1/LRRC6/TEK/INSL3/SFRP1
BP	GO:0007369	gastrulation	Feb-52	28/4503	0.040836445	0.498831912	0.478400737	282143/282068	2	APLN/SFRP1
BP	GO:0045766	positive regulation of angiogenesis	Feb-52	28/4503	0.040836445	0.498831912	0.478400737	281572/280939	2	VEGFA/TEK
BP	GO:0060294	cilium movement involved in cell motility	Feb-52	28/4503	0.040836445	0.498831912	0.478400737	617472/527979	2	CATSPERD/LRRC6
BP	GO:1904018	positive regulation of vasculature development	Feb-52	28/4503	0.040836445	0.498831912	0.478400737	281572/280939	2	VEGFA/TEK
BP	GO:0001525	angiogenesis	Apr-52	115/4503	0.042713399	0.498831912	0.478400737	281572/282143/280939/282068	4	VEGFA/APLN/TEK/SFRP1
BP	GO:0010631	epithelial cell migration	Mar-52	68/4503	0.043033779	0.498831912	0.478400737	281572/280939/281870	3	VEGFA/TEK/INSL3
BP	GO:0090132	epithelium migration	Mar-52	68/4503	0.043033779	0.498831912	0.478400737	281572/280939/281870	3	VEGFA/TEK/INSL3
BP	GO:0048534	hematopoietic or lymphoid organ development	May-52	168/4503	0.043104102	0.498831912	0.478400737	506206/282713/281871/282068/516209	5	MR1/NFKBIZ/ISG15/SFRP1/LFNG
BP	GO:0009968	negative regulation of signal transduction	Jun-52	225/4503	0.043431894	0.498831912	0.478400737	281871/281453/282143/616753/282068/516209	6	ISG15/RGS9/APLN/CISH/SFRP1/LFNG
BP	GO:0042325	regulation of phosphorylation	Jun-52	227/4503	0.045035642	0.498831912	0.478400737	281572/281240/280939/515233/616753/282068	6	VEGFA/IGF2/TEK/EEF1A2/CISH/SFRP1
BP	GO:0048870	cell motility	Jul-52	288/4503	0.045769421	0.498831912	0.478400737	617472/281572/509524/527979/280939/281870/282068	7	CATSPERD/VEGFA/DRC1/LRRC6/TEK/INSL3/SFRP1
BP	GO:0051674	localization of cell	Jul-52	288/4503	0.045769421	0.498831912	0.478400737	617472/281572/509524/527979/280939/281870/282068	7	CATSPERD/VEGFA/DRC1/LRRC6/TEK/INSL3/SFRP1
BP	GO:0071453	cellular response to oxygen levels	Feb-52	30/4503	0.046315357	0.498831912	0.478400737	281572/282068	2	VEGFA/SFRP1
BP	GO:0071356	cellular response to tumor necrosis factor	Feb-52	31/4503	0.049151018	0.498831912	0.478400737	282359/282068	2	SLC2A4/SFRP1
CC	GO:0031514	motile cilium	Apr-55	49/4786	0.002254478	0.203977398	0.201656176	617472/509524/527979/617430	4	CATSPERD/DRC1/LRRC6/CFAP300
CC	GO:0042383	sarcolemma	Mar-55	34/4786	0.006680468	0.203977398	0.201656176	327703/282359/528386	3	CACNB1/SLC2A4/CAVIN4
CC	GO:0001725	stress fiber	Feb-55	Dec-86	0.007949946	0.203977398	0.201656176	515610/280939	2	ACTA2/TEK
CC	GO:0097517	contractile actin filament bundle	Feb-55	Dec-86	0.007949946	0.203977398	0.201656176	515610/280939	2	ACTA2/TEK
CC	GO:0032432	actin filament bundle	Feb-55	13/4786	0.009326543	0.203977398	0.201656176	515610/280939	2	ACTA2/TEK
CC	GO:0042641	actomyosin	Feb-55	13/4786	0.009326543	0.203977398	0.201656176	515610/280939	2	ACTA2/TEK
CC	GO:0005884	actin filament	Feb-55	15/4786	0.012371852	0.203977398	0.201656176	515610/280939	2	ACTA2/TEK
CC	GO:0045121	membrane raft	Apr-55	79/4786	0.012404031	0.203977398	0.201656176	281534/282359/280939/528386	4	TLR2/SLC2A4/TEK/CAVIN4
CC	GO:0098857	membrane microdomain	Apr-55	79/4786	0.012404031	0.203977398	0.201656176	281534/282359/280939/528386	4	TLR2/SLC2A4/TEK/CAVIN4
MF	GO:0030545	signaling receptor regulator activity	Jul-46	134/3916	0.000823454	0.10704898	0.102281617	616085/281572/280888/281240/282143/533337/281870	7	CLEC12B/VEGFA/OXT/IGF2/APLN/TMEM35A/INSL3
MF	GO:0005179	hormone activity	Apr-46	52/3916	0.002989437	0.194313433	0.185659798	280888/281240/282143/281870	4	OXT/IGF2/APLN/INSL3
MF	GO:0008483	transaminase activity	Feb-46	16-Dec	0.008267633	0.264737524	0.252947594	280719/539188	2	AMT/GPT
MF	GO:0016769	transferase activity, transferring nitrogenous groups	Feb-46	13/3916	0.00969817	0.264737524	0.252947594	280719/539188	2	AMT/GPT
MF	GO:0005102	signaling receptor binding	Aug-46	267/3916	0.011317814	0.264737524	0.252947594	281572/280888/506206/281240/281871/282143/281870/282068	8	VEGFA/OXT/MR1/IGF2/ISG15/APLN/INSL3/SFRP1
MF	GO:0048018	receptor ligand activity	May-46	129/3916	0.016672458	0.264737524	0.252947594	281572/280888/281240/282143/281870	5	VEGFA/OXT/IGF2/APLN/INSL3
MF	GO:0030546	signaling receptor activator activity	May-46	130/3916	0.017189322	0.264737524	0.252947594	281572/280888/281240/282143/281870	5	VEGFA/OXT/IGF2/APLN/INSL3
MF	GO:0005178	integrin binding	Feb-46	18/3916	0.018327982	0.264737524	0.252947594	281240/281871	2	IGF2/ISG15
MF	GO:0015085	calcium ion transmembrane transporter activity	Feb-46	18/3916	0.018327982	0.264737524	0.252947594	327703/518117	2	CACNB1/ATP2A1
MF	GO:0005516	calmodulin binding	Mar-46	51/3916	0.021321237	0.27717608	0.264832206	282876/281969/614904	3	NOS2/PDE1A/MAP6D1
MF	GO:0050660	flavin adenine dinucleotide binding	Feb-46	28/3916	0.042049924	0.475563277	0.454384345	282876/338074	2	NOS2/AOX1
MF	GO:0098772	molecular function regulator	Sep-46	407/3916	0.043898149	0.475563277	0.454384345	616085/281572/327676/280888/281240/282143/514137/533337/281870	9	CLEC12B/VEGFA/ARHGDIB/OXT/IGF2/APLN/ARHGAP36/TMEM35A/INSL3
