# Supplementary material for: Transcriptome Reveals Granulosa Cells Coping through Redox, Inflammatory and Metabolic Mechanisms under Acute Heat Stress
Source: Cells. 2022 Apr 25;11(9):1443. doi: 10.3390/cells11091443 (PMC9105522; doi:10.3390/cells11091443)
Supplement: Supplementary file 1 [file cells-11-01443-s001.zip › Supplementary Table S6.xlsx]

## Sheet: Supplementary Table S6
Supplementary Table S6: List containing differentially expressed genes and their statistical parametrs involved in PPI interaction network analysis at the confidence score of 0.9.
#node1	node2	node1_string_id	node2_string_id	homology	coexpression	experimentally_determined_interaction	database_annotated	automated_textmining	combined_score
ADH6	MAOB	ENSBTAP00000009191	ENSBTAP00000001698	0	0	0	0.964	0.207	0.97
AKT1S1	RPTOR	ENSBTAP00000007575	ENSBTAP00000003739	0	0.061	0.951	0.919	0.989	0.999
AKT1S1	DEPTOR	ENSBTAP00000007575	ENSBTAP00000020394	0	0	0	0.919	0.989	0.999
AMY2B	PYGM	ENSBTAP00000025421	ENSBTAP00000001373	0	0.18	0.16	0.921	0.246	0.956
AOC2	MAOB	ENSBTAP00000040444	ENSBTAP00000001698	0	0.052	0	0.8	0.643	0.926
AOX1	MAOB	ENSBTAP00000012827	ENSBTAP00000001698	0	0.062	0	0.9	0.147	0.913
ARHGAP33	RHOJ	ENSBTAP00000012813	ENSBTAP00000022858	0	0	0.174	0.917	0.079	0.931
ARHGAP36	RHOJ	ENSBTAP00000028237	ENSBTAP00000022858	0	0	0.184	0.928	0.116	0.943
CDKN2A	TP53	ENSBTAP00000051503	ENSBTAP00000001420	0	0	0.814	0.616	0.86	0.989
DEPTOR	RPTOR	ENSBTAP00000020394	ENSBTAP00000003739	0	0	0.218	0.919	0.985	0.999
DEPTOR	AKT1S1	ENSBTAP00000020394	ENSBTAP00000007575	0	0	0	0.919	0.989	0.999
DFNB31	GPR98	ENSBTAP00000013333	ENSBTAP00000007926	0	0	0.045	0	0.962	0.962
ENSBTAP00000007026	KDR	ENSBTAP00000007026	ENSBTAP00000001038	0	0.062	0.924	0.591	0.272	0.975
FKBP1B	RYR2	ENSBTAP00000004419	ENSBTAP00000053650	0	0.061	0.956	0	0.985	0.999
GNB5	RGS9	ENSBTAP00000004896	ENSBTAP00000023605	0	0	0.996	0.612	0.75	0.999
GPR98	DFNB31	ENSBTAP00000007926	ENSBTAP00000013333	0	0	0.045	0	0.962	0.962
IFI27	ISG15	ENSBTAP00000004093	ENSBTAP00000019573	0	0.864	0	0	0.671	0.953
IFI44L	OAS1Y	ENSBTAP00000031029	ENSBTAP00000016856	0	0.821	0	0	0.527	0.912
INSL3	RXFP3	ENSBTAP00000027848	ENSBTAP00000048885	0	0	0	0.8	0.817	0.961
ISG15	IFI27	ENSBTAP00000019573	ENSBTAP00000004093	0	0.864	0	0	0.671	0.953
ISG15	OAS1Y	ENSBTAP00000019573	ENSBTAP00000016856	0	0.934	0	0	0.729	0.981
KDR	ENSBTAP00000007026	ENSBTAP00000001038	ENSBTAP00000007026	0	0.062	0.924	0.591	0.272	0.975
MAOB	AOX1	ENSBTAP00000001698	ENSBTAP00000012827	0	0.062	0	0.9	0.147	0.913
MAOB	AOC2	ENSBTAP00000001698	ENSBTAP00000040444	0	0.052	0	0.8	0.643	0.926
MAOB	ADH6	ENSBTAP00000001698	ENSBTAP00000009191	0	0	0	0.964	0.207	0.97
MDM4	TP53	ENSBTAP00000008209	ENSBTAP00000001420	0	0.143	0.997	0.91	0.855	0.999
OAS1Y	IFI44L	ENSBTAP00000016856	ENSBTAP00000031029	0	0.821	0	0	0.527	0.912
OAS1Y	ISG15	ENSBTAP00000016856	ENSBTAP00000019573	0	0.934	0	0	0.729	0.981
PLXNA2	PLXNA4	ENSBTAP00000001558	ENSBTAP00000019327	0.949	0.062	0	0.9	0.828	0.906
PLXNA2	SEMA6A	ENSBTAP00000001558	ENSBTAP00000041442	0	0.062	0.948	0.196	0.916	0.996
PLXNA4	PLXNA2	ENSBTAP00000019327	ENSBTAP00000001558	0.949	0.062	0	0.9	0.828	0.906
PYGM	AMY2B	ENSBTAP00000001373	ENSBTAP00000025421	0	0.18	0.16	0.921	0.246	0.956
RGS9	GNB5	ENSBTAP00000023605	ENSBTAP00000004896	0	0	0.996	0.612	0.75	0.999
RHOJ	ARHGAP33	ENSBTAP00000022858	ENSBTAP00000012813	0	0	0.174	0.917	0.079	0.931
RHOJ	ARHGAP36	ENSBTAP00000022858	ENSBTAP00000028237	0	0	0.184	0.928	0.116	0.943
RPTOR	DEPTOR	ENSBTAP00000003739	ENSBTAP00000020394	0	0	0.218	0.919	0.985	0.999
RPTOR	AKT1S1	ENSBTAP00000003739	ENSBTAP00000007575	0	0.061	0.951	0.919	0.989	0.999
RXFP3	INSL3	ENSBTAP00000048885	ENSBTAP00000027848	0	0	0	0.8	0.817	0.961
RYR2	FKBP1B	ENSBTAP00000053650	ENSBTAP00000004419	0	0.061	0.956	0	0.985	0.999
SEMA6A	PLXNA2	ENSBTAP00000041442	ENSBTAP00000001558	0	0.062	0.948	0.196	0.916	0.996
TP53	CDKN2A	ENSBTAP00000001420	ENSBTAP00000051503	0	0	0.814	0.616	0.86	0.989
TP53	MDM4	ENSBTAP00000001420	ENSBTAP00000008209	0	0.143	0.997	0.91	0.855	0.999
